# Supplementary material for: An untargeted metabolomics approach to determine component differences and variation in their in vivo distribution between Kuqin and Ziqin, two commercial specifications of Scutellaria Radix
Source: Royal Society of Chemistry journal article supplement (doi:10.1039/c7ra10705f), 2017-01-01
Supplement: c7ra10705f1.pdf [file c7ra10705f1.pdf]

## Electronic Supplementary Information (ESI)

### **An untargeted metabolomics approach to determine component differences and variation in their *in vivo* distribution between Kuqin and Ziqin, two commercial specifications of *Scutellaria Radix*<sup>†</sup>**

Zhi-Wei Yang<sup>a</sup>, Feng Xu<sup>b,\*</sup>, Xin Liu<sup>c</sup>, Yi Cao<sup>a</sup>, Qi Tang<sup>a</sup>, Qian-Yu Chen<sup>a</sup>, Ming-Ying Shang<sup>b</sup>, Guang-Xue Liu<sup>b</sup>, Xuan Wang<sup>a,\*</sup>, Shao-Qing Cai<sup>b</sup>

<sup>a</sup> Department of Chemical Biology, School of Pharmaceutical Sciences, Peking University, No. 38 Xueyuan Road, Beijing 100191, PR China.

<sup>b</sup> State Key Laboratory of Natural and Biomimetic Drugs, Peking University, No. 38 Xueyuan Road, Beijing 100191, PR China.

<sup>c</sup> Technical Center, Beijing Entry-Exit Inspection and Quarantine Bureau, No. 6 Tianshuiyuan Street, Beijing, 100026, PR China.

<sup>†</sup>Electronic supplementary information (ESI) available.

#### **\* Corresponding author:**

**Dr. Feng Xu.** State Key Laboratory of Natural and Biomimetic Drugs, Peking University, No. 38 Xueyuan Road, Haidian District, Beijing 100191, PR China. Tel: +86-10-82802534; E-mail: xufeng76@bjmu.edu.cn.

**Dr. Xuan Wang (responsible for all correspondence during review and processing of the manuscript),** Department of Chemical Biology, School of Pharmaceutical Sciences, Peking University, No. 38 Xueyuan Road, Haidian District, Beijing 100191, PR China. Tel: +86-10-82806818; E-mail: xuanwang6818@bjmu.edu.cn.

## Contents

| <b>Part A</b>    |                                                                                                                                          | <b>Pages</b> |
|------------------|------------------------------------------------------------------------------------------------------------------------------------------|--------------|
| <b>Table S1</b>  | Information of 51 Kuqin (KQ) and Ziqin (ZQ) samples                                                                                      | <b>6</b>     |
| <b>Table S2</b>  | Peak areas of the main active constituents in six batches of KQ and ZQ crude drug samples                                                | <b>8</b>     |
| <b>Figure S1</b> | Pattern analysis scores scatter plots between KQ and ZQ in colon and lungs                                                               | <b>9</b>     |
| <b>Figure S2</b> | Pattern analysis scores scatter plots between KQ and ZQ crude drug samples                                                               | <b>10</b>    |
| <b>Figure S3</b> | Extracted ion chromatograms of the constituents of <i>Scutellariae Radix</i>                                                             | <b>11</b>    |
| <b>Figure S4</b> | Chemical difference between KQ and ZQ samples in negative ion modes for group one                                                        | <b>12</b>    |
| <b>Figure S5</b> | Chemical difference between KQ and ZQ in positive ion modes for group one                                                                | <b>13</b>    |
| <b>Table S3</b>  | Characterization of constituents with content difference between KQ and ZQ                                                               | <b>14</b>    |
| <b>Table S4</b>  | Literature reported biological activities of anti-inflammation, inhibiting of lungs and colon related diseases of 114 constituents in SR | <b>23</b>    |
| <b>Table S5</b>  | Peak area ratios of different constituents of KQ and ZQ samples                                                                          | <b>24</b>    |
| <b>Table S6</b>  | Peak areas of the main active constituents in colon calculated from extracted ion chromatograms in six repeated experiments              | <b>26</b>    |
| <b>Table S7</b>  | Peak areas of the main active constituents in lungs calculated from extracted ion chromatograms in six repeated experiments              | <b>27</b>    |

**Part B: MS<sup>2</sup> and proposed fragmentation pathways of constituents in SR, colon and lungs tissues**

|                                              |    |
|----------------------------------------------|----|
| <u>S2</u> .....                              | 28 |
| <u>S3, and S4</u> .....                      | 29 |
| <u>S5</u> .....                              | 31 |
| <u>S6, S21, and S25</u> .....                | 32 |
| <u>S7, S13, S17, S20, S29, and S39</u> ..... | 35 |
| <u>S8</u> .....                              | 39 |
| <u>S9</u> .....                              | 40 |
| <u>S10</u> .....                             | 41 |
| <u>S11</u> .....                             | 42 |
| <u>S12, and S32</u> .....                    | 43 |
| <u>S14</u> .....                             | 44 |
| <u>S15</u> .....                             | 44 |
| <u>S16</u> .....                             | 45 |
| <u>S18</u> .....                             | 46 |
| <u>S19</u> .....                             | 46 |
| <u>S22</u> .....                             | 47 |
| <u>S23</u> .....                             | 48 |
| <u>S24</u> .....                             | 49 |
| <u>S26, S27, S36, and S37</u> .....          | 50 |
| <u>S28</u> .....                             | 52 |
| <u>S30</u> .....                             | 53 |
| <u>S31, S44, S48, and S101</u> .....         | 54 |
| <u>S32</u> .....                             | 57 |
| <u>S33</u> .....                             | 58 |
| <u>S34</u> .....                             | 59 |
| <u>S35</u> .....                             | 59 |
| <u>S38</u> .....                             | 60 |
| <u>S41, S42, and S43</u> .....               | 61 |
| <u>S45</u> .....                             | 63 |
| <u>S47</u> .....                             | 64 |
| <u>S49</u> .....                             | 64 |
| <u>S50</u> .....                             | 65 |
| <u>S51, S53, S54, and S82</u> .....          | 66 |

|                                               |     |
|-----------------------------------------------|-----|
| <u>S52, S55, S61, S63, and S69</u> .....      | 69  |
| <u>S56</u> .....                              | 73  |
| <u>S60, S62, S68, S74, S79, and S81</u> ..... | 74  |
| <u>S64, S71</u> .....                         | 78  |
| <u>S65, S73, and S76</u> .....                | 80  |
| <u>S66</u> .....                              | 83  |
| <u>S70</u> .....                              | 84  |
| <u>S72</u> .....                              | 85  |
| <u>S75</u> .....                              | 86  |
| <u>S77</u> .....                              | 87  |
| <u>S80</u> .....                              | 88  |
| <u>S83, S84</u> .....                         | 89  |
| <u>S85</u> .....                              | 91  |
| <u>S86</u> .....                              | 92  |
| <u>S87</u> .....                              | 93  |
| <u>S88</u> .....                              | 93  |
| <u>S89</u> .....                              | 94  |
| <u>S90</u> .....                              | 94  |
| <u>S91</u> .....                              | 95  |
| <u>S92</u> .....                              | 96  |
| <u>S93</u> .....                              | 97  |
| <u>S94</u> .....                              | 98  |
| <u>S95</u> .....                              | 99  |
| <u>S96</u> .....                              | 99  |
| <u>S57, S97</u> .....                         | 100 |
| <u>S98</u> .....                              | 102 |
| <u>S99</u> .....                              | 103 |
| <u>S100</u> .....                             | 104 |
| <u>S102</u> .....                             | 104 |
| <u>S103, and S106</u> .....                   | 105 |
| <u>S104, and S108</u> .....                   | 107 |
| <u>S105</u> .....                             | 108 |
| <u>S107</u> .....                             | 109 |
| <u>S108</u> .....                             | 109 |

|                   |     |
|-------------------|-----|
| <u>S109</u> ..... | 110 |
| <u>S110</u> ..... | 110 |
| <u>S111</u> ..... | 111 |
| <u>S112</u> ..... | 111 |
| <u>S113</u> ..... | 112 |
| <u>S114</u> ..... | 113 |
| <u>M1</u> .....   | 114 |
| <u>M3</u> .....   | 115 |
| <u>M4</u> .....   | 115 |
| <u>M5</u> .....   | 116 |
| <u>M6</u> .....   | 116 |
| <u>M7</u> .....   | 117 |
| <u>M8</u> .....   | 117 |
| <u>M9</u> .....   | 118 |
| <u>M10</u> .....  | 119 |
| <u>M11</u> .....  | 120 |
| <u>M12</u> .....  | 121 |
| <u>M13</u> .....  | 122 |
| <u>M14</u> .....  | 123 |
| <u>M15</u> .....  | 124 |
| <u>M16</u> .....  | 125 |

**PART A**

**Table S1** Information of 51 Kuqin (KQ) and Ziqin (ZQ) samples

| <b>NO.</b> | <b>Sample ID</b> | <b>Specification</b> | <b>Collection Date</b> | <b>Region</b>           |
|------------|------------------|----------------------|------------------------|-------------------------|
| 1          | KQ-6590          | Kuqin                | 2010/10                | Inner Mongolia          |
| 2          | KQ-6613          | Kuqin                | 2010/11                | Hebei province          |
| 3          | KQ-6616-1        | Kuqin                | 2010/11                | Hebei province          |
| 4          | KQ-6616-2        | Kuqin                | 2010/11                | Hebei province          |
| 5          | KQ-6618          | Kuqin                | 2010/11                | Hebei province          |
| 6          | KQ-6620          | Kuqin                | 2010/11                | Hebei province          |
| 7          | KQ-6626-1        | Kuqin                | 2010/11                | Hebei province          |
| 8          | KQ-6626-2        | Kuqin                | 2010/11                | Hebei province          |
| 9          | KQ-6628          | Kuqin                | 2010/11                | Hebei province          |
| 10         | KQ-6629          | Kuqin                | 2010/11                | Hebei province          |
| 11         | KQ-6697          | Kuqin                | 2010/12                | Shandong Province       |
| 12         | KQ-70002         | Kuqin                | 2014/10                | Inner Mongolia          |
| 13         | KQ-7486-1        | Kuqin                | 2014/07                | Inner Mongolia          |
| 14         | KQ-7486-2        | Kuqin                | 2014/07                | Inner Mongolia          |
| 15         | KQ-7486-3        | Kuqin                | 2014/07                | Inner Mongolia          |
| 16         | KQ-7591          | Kuqin                | 2014/09                | Inner Mongolia          |
| 17         | KQ-7591-1        | Kuqin                | 2014/09                | Inner Mongolia          |
| 18         | KQ-7591-L1       | Kuqin                | 2014/09                | Inner Mongolia          |
| 19         | KQ-7591-L2       | Kuqin                | 2014/09                | Inner Mongolia          |
| 20         | KQ-7591-L3       | Kuqin                | 2014/09                | Inner Mongolia          |
| 21         | KQ-7591-M1       | Kuqin                | 2014/09                | Inner Mongolia          |
| 22         | KQ-7591-M2       | Kuqin                | 2014/09                | Inner Mongolia          |
| 23         | KQ-7591-M3       | Kuqin                | 2014/09                | Inner Mongolia          |
| 24         | KQ-7591-PS-1     | Kuqin                | 2014/09                | Inner Mongolia          |
| 25         | KQ-7591-PS-2     | Kuqin                | 2014/09                | Inner Mongolia          |
| 26         | KQ-7591-PS-3     | Kuqin                | 2014/09                | Inner Mongolia          |
| 27         | KQ-7591-PS-4     | Kuqin                | 2014/09                | Inner Mongolia          |
| 28         | KQ-7591-PS-5     | Kuqin                | 2014/09                | Inner Mongolia          |
| 29         | ZQ-5773          | Ziqin                | 2007/07                | Shandong Province       |
| 30         | ZQ-5797          | Ziqin                | 2007/10                | Gansu province          |
| 31         | ZQ-6580          | Ziqin                | 2010/10                | Gansu province          |
| 32         | ZQ-6596          | Ziqin                | 2010/10                | Inner Mongolia          |
| 33         | ZQ-6614          | Ziqin                | 2010/11                | Hebei province          |
| 34         | ZQ-6619          | Ziqin                | 2010/11                | Hebei province          |
| 35         | ZQ-6624          | Ziqin                | 2010/11                | Hebei province          |
| 36         | ZQ-6630          | Ziqin                | 2010/11                | Hebei province          |
| 37         | ZQ-6633          | Ziqin                | 2010/11                | Yanqing County, Beijing |
| 38         | ZQ-6636          | Ziqin                | 2010/11                | Hebei Province          |
| 39         | ZQ-6697          | Ziqin                | 2010/12                | Shandong Province       |
| 40         | ZQ-6701          | Ziqin                | 2010/01                | Henan province          |

|    |            |       |         |                |
|----|------------|-------|---------|----------------|
| 41 | ZQ-70001   | Ziqin | 2014/10 | Inner Mongolia |
| 42 | ZQ-7487-1  | Ziqin | 2014/07 | Inner Mongolia |
| 43 | ZQ-7487-2  | Ziqin | 2014/07 | Inner Mongolia |
| 44 | ZQ-7593    | Ziqin | 2014/09 | Inner Mongolia |
| 45 | ZQ-7593-1  | Ziqin | 2014/09 | Inner Mongolia |
| 46 | ZQ-7593-L1 | Ziqin | 2014/09 | Inner Mongolia |
| 47 | ZQ-7593-L2 | Ziqin | 2014/09 | Inner Mongolia |
| 48 | ZQ-7593-L3 | Ziqin | 2014/09 | Inner Mongolia |
| 49 | ZQ-7593-M1 | Ziqin | 2014/09 | Inner Mongolia |
| 50 | ZQ-7593-M2 | Ziqin | 2014/09 | Inner Mongolia |
| 51 | ZQ-7593-S  | Ziqin | 2014/09 | Inner Mongolia |

---

**Table S2.** Peak areas of the main active constituents in six batches of KQ and ZQ crude drug samples. (ZQ samples batch No. were 7593, 6616, 6620, 70002, and 7486; KQ samples batch No. were 7591, 6619, 6614, 70001, and 7487; Peak area unit, mAU·s)

| ID  | Compounds                                               | KQ-G1&G2 | KQ-G3   | KQ-G4   | KQ-G5    | KQ-G6   | ZQ-G1&G2 | ZQ-G3   | ZQ-G4   | ZQ-G5    | ZQ-G6   |
|-----|---------------------------------------------------------|----------|---------|---------|----------|---------|----------|---------|---------|----------|---------|
|     |                                                         | No.7591  | No.6616 | No.6620 | No.70002 | No.7486 | No.7593  | No.6619 | No.6614 | No.70001 | No.7487 |
| S40 | Chrysin 6- <i>C</i> -arabinoside 8- <i>C</i> -glucoside | 3282.4   | 2896.8  | 2276.9  | 2156.7   | 3685.8  | 2531.3   | 3281.1  | 2512.8  | 2804.9   | 3720.7  |
| S46 | Chrysin 6- <i>C</i> -glucoside 8- <i>C</i> -arabinoside | 2516.8   | 1688.9  | 1424.3  | 1285.6   | 2189.0  | 1760.9   | 2055.3  | 1511.7  | 1705.1   | 2300.9  |
| S39 | Baicalin                                                | 70110.8  | 46159.5 | 40624.6 | 46798.9  | 84945.1 | 54239.5  | 74453.6 | 56288.9 | 63557.1  | 89242.1 |
| S25 | Wogonoside                                              | 19619.0  | 12814.9 | 12765.8 | 11536.8  | 23661.9 | 14572.0  | 21983.8 | 15610.8 | 16614.7  | 22611.1 |
| S21 | Oroxylin A 7- <i>O</i> -glucuronide                     | 8986.9   | 5781.5  | 1631.6  | 5036.8   | 8177.6  | 4828.2   | 8260.9  | 3953.5  | 8804.1   | 8475.2  |
| S59 | Baicalein                                               | 4599.4   | 7592.1  | 3430.1  | 4858.5   | 7286.8  | 3558.1   | 4160.2  | 4755.3  | 4121.5   | 5845.2  |
| S60 | Wogonin                                                 | 1035.3   | 2841.9  | 2317.0  | 2559.1   | 2847.3  | 868.1    | 2470.3  | 2599.3  | 1903.1   | 2413.4  |
| S62 | Oroxylin A                                              | 657.1    | 947.2   | 591.0   | 1314.6   | 1183.5  | 321.4    | 999.1   | 806.9   | 1133.6   | 979.5   |
| S78 | Chrysin                                                 | 211.4    | 113.4   | 246.0   | 158.4    | 234.2   | 126.0    | 111.8   | 289.0   | 143.5    | 144.3   |



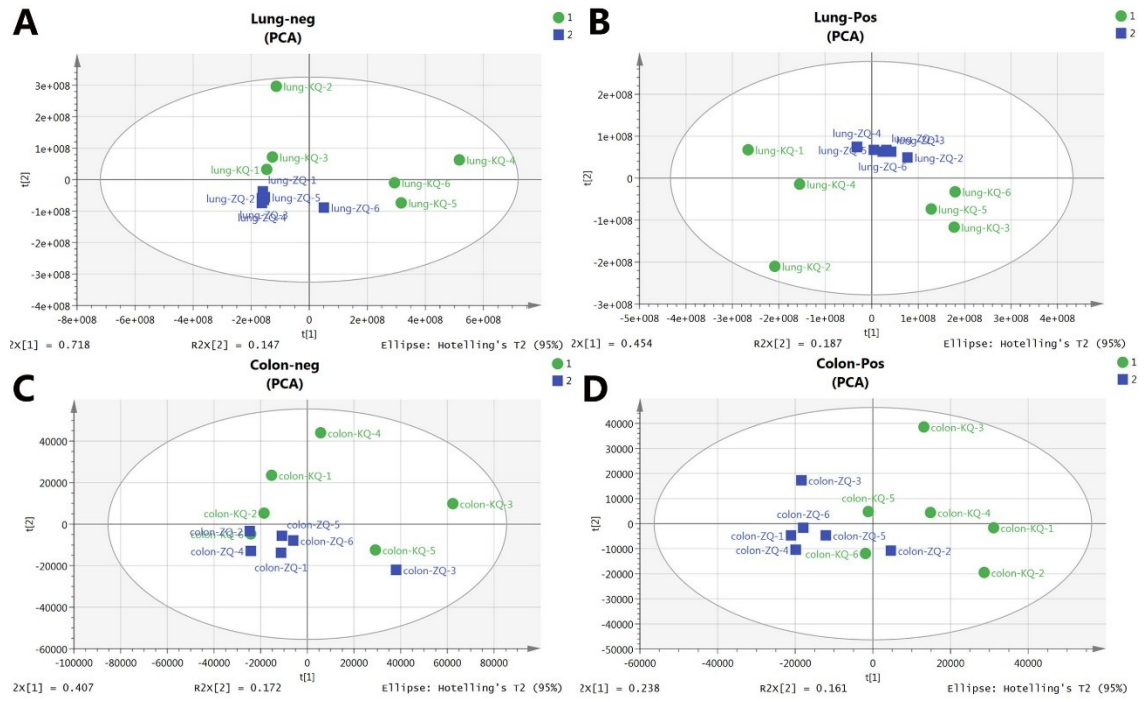

**Figure S1.** Pattern analysis scores scatter plots between KQ (●1) and ZQ (■2) in colon and lungs. For lungs, PCA in negative (A) and positive (B) ion modes; For colon, PCA in negative (C) and positive (E) ion modes.

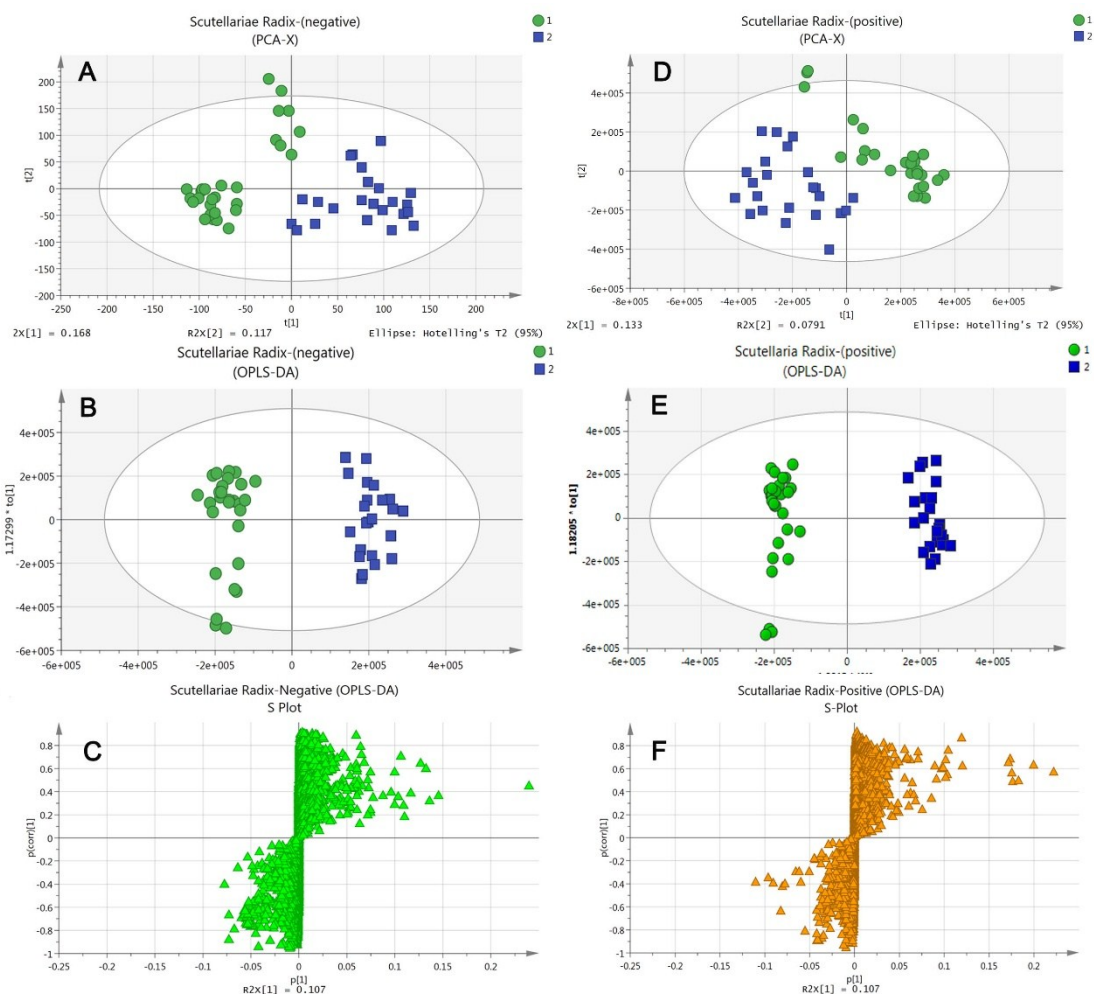

**Figure S2.** Pattern analysis scores scatter plots between KQ (●1) and ZQ (■2) crude drug samples: PCA in negative (A) and positive (D) ion modes; OPLS-DA in negative (B) and positive (E) ion modes. S-plot of OPLS-DA model both in negative (C) and positive (F) ion modes.

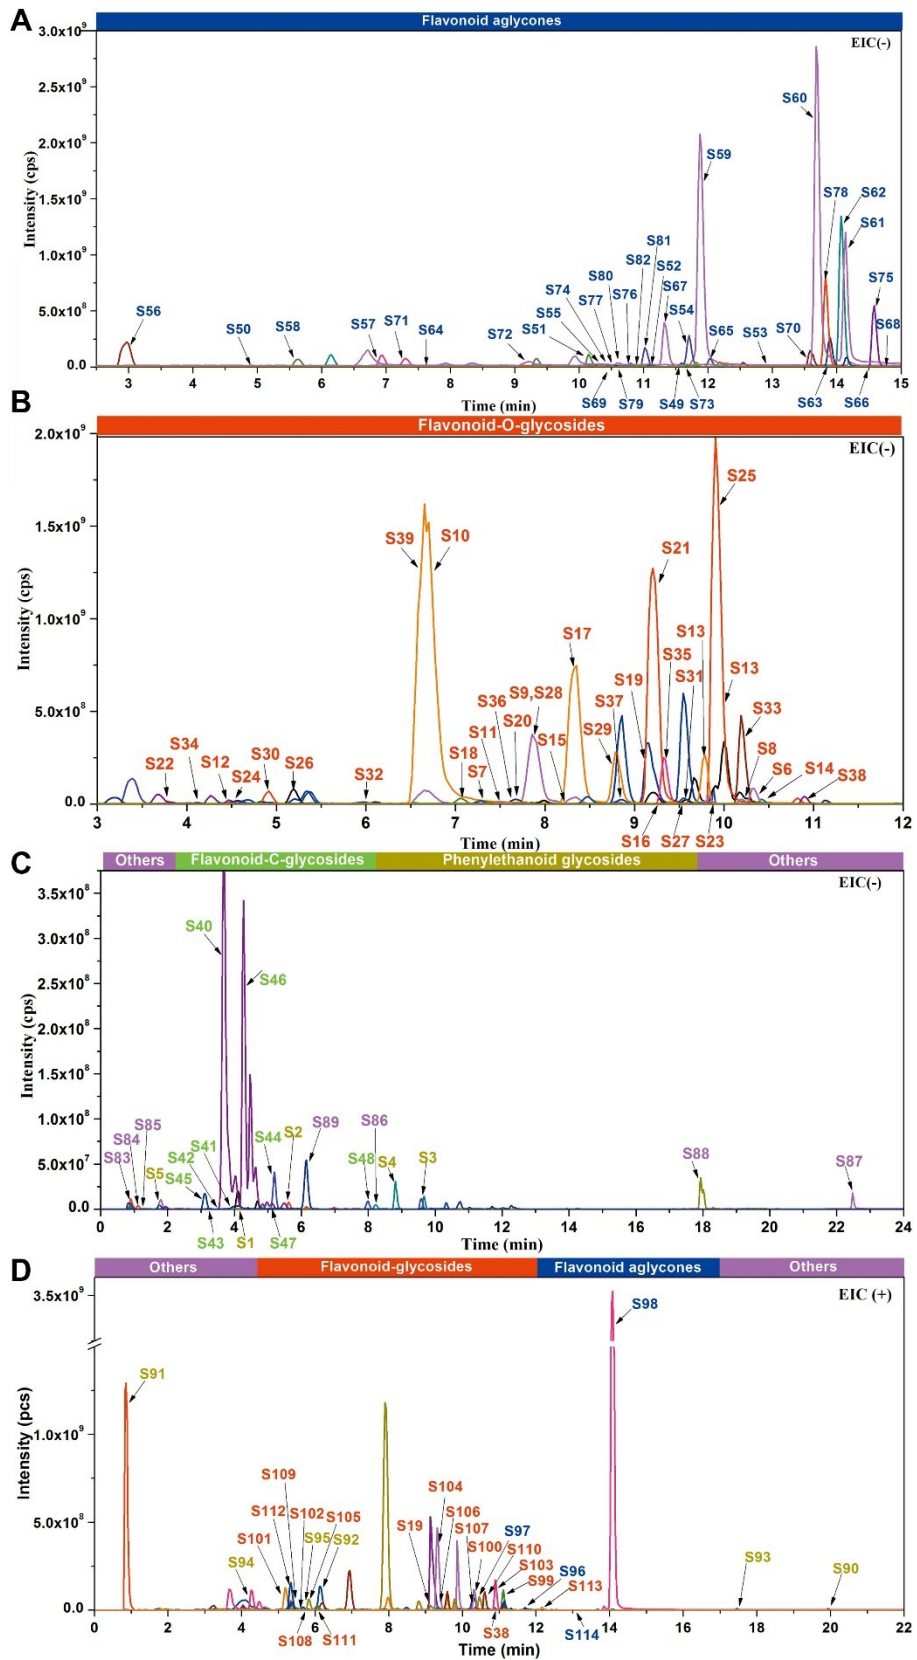

**Figure S3.** Extracted ion chromatograms of the constituents of *Scutellariae Radix*. (A) flavonoid aglycones, (B) flavonoid *O*-glycosides, (C) flavonoid *C*-glycosides, phenylethanoid glycosides, and other types in negative ion mode, and (D) flavonoid glycoside, flavonoid aglycones and other types in positive ion mode (samples No. 7593).

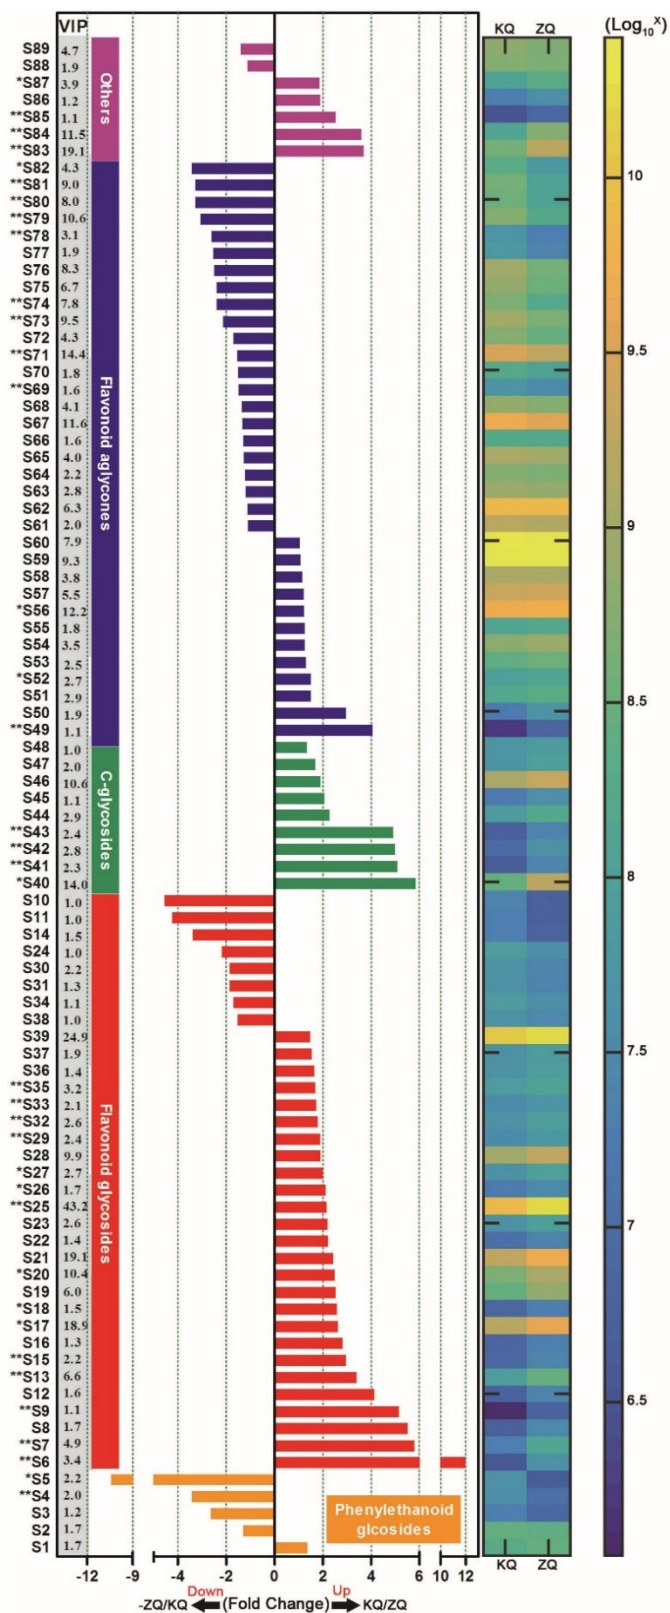

**Figure S4.** Chemical difference between KQ (SR sample No. 7591) and ZQ (SR sample No. 7593) in negative ion mode for group one. The heatmap represented relative content of components in KQ (left) and ZQ (right); Sn, prototype components in SR,  $n = N$ ; Down (Fold change  $< 0$ ) = lower content in ZQ; Up (Fold Change  $> 0$ ) = higher content in ZQ; \*  $p \leq 0.05$ , \*\*  $p \leq 0.01$ .

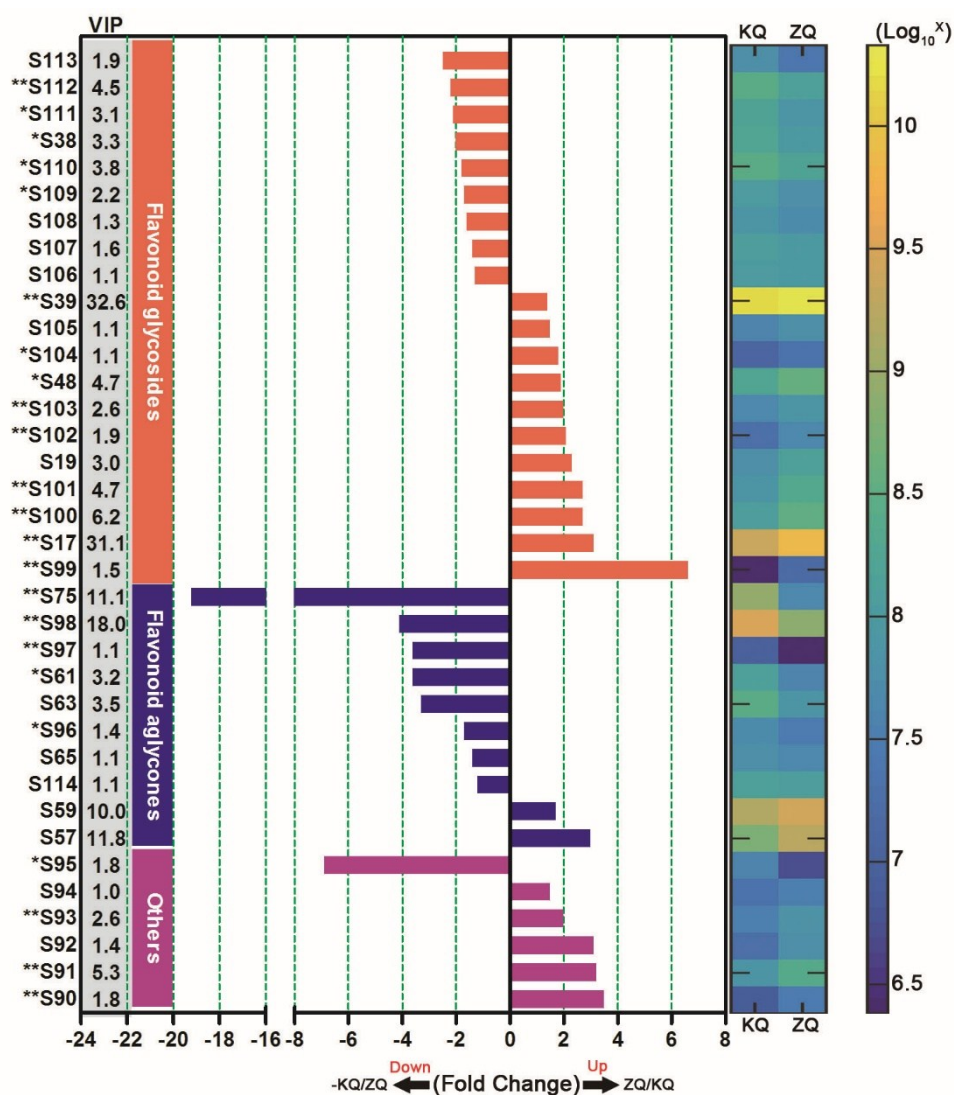

**Figure S5.** Chemical difference between KQ (SR sample No. 7591) and ZQ (SR sample No. 7593) in positive ion mode for group one. The heat map represented relative content of components in KQ (left) and ZQ (right); Sn, prototype components in SR, n = N; Down (Fold Change < 0) = lower content in ZQ; Up (Fold Change > 0) = higher content in ZQ; \*  $p \leq 0.05$ , \*\*  $p \leq 0.01$ .

**Table S3.** Characterization of constituents with content difference between KQ and ZQ

| ID  | t <sub>R</sub><br>(min) | [M±H] <sup>±</sup> | ion<br>mode | Predicted<br>Formula                            | Diff<br>(ppm) | ESI-MS <sup>2</sup> m/z (% Relative)                                                                                                                | Identification                                                                                               | Structure Type                | Note*            |
|-----|-------------------------|--------------------|-------------|-------------------------------------------------|---------------|-----------------------------------------------------------------------------------------------------------------------------------------------------|--------------------------------------------------------------------------------------------------------------|-------------------------------|------------------|
| S1  | 4.03                    | 623.19869          | –           | C <sub>29</sub> H <sub>36</sub> O <sub>15</sub> | 0.877         | 461.16760(6),415.10431(27),179.03514(3),161.02452(100), 135.04463(8)                                                                                | Acteoside                                                                                                    | Phenylethanoid<br>glcosides   | /                |
| S2  | 5.56                    | 637.21439          | –           | C <sub>30</sub> H <sub>38</sub> O <sub>15</sub> | 0.936         | 461.16754(9),315.11038(5),193.05070(18),175.0405(100),160.01636(22),153.05603(10),135.04518(17),113.02439(27)                                       | Leucosceptoside A                                                                                            | Phenylethanoid<br>glcosides   | /                |
| S3  | 9.71                    | 651.23014          | –           | C <sub>31</sub> H <sub>40</sub> O <sub>15</sub> | 1.069         | 636.66242(0.7),193.05060(24),175.03962(100),160.01694(20),149.06090(5),134.03725(5),113.02420(18)                                                   | Isomartynoside                                                                                               | Phenylethanoid<br>glcosides   | F.I <sup>#</sup> |
| S4  | 8.84                    | 651.23018          | –           | C <sub>31</sub> H <sub>40</sub> O <sub>15</sub> | 1.131         | 329.12497(1),299.05658(1),193.05080(13),175.04013(100),167.07126(3),160.01660(28),149.06087(3),134.03743(8),119.03503(2),113.02441(15),101.02448(2) | Martynoside                                                                                                  | Phenylethanoid<br>glcosides   | /                |
| S5  | 1.78                    | 475.18188          | –           | C <sub>21</sub> H <sub>32</sub> O <sub>12</sub> | –0.462        | 329.12436(2),311.11435(1),167.07141(2),149.06070(4),134.03731(4),113.02430(100),101.02428(17),95.01369(9)                                           | Darendoside A                                                                                                | Phenylethanoid<br>glcosides   | /                |
| S6  | 10.31                   | 459.0938           | –           | C <sub>22</sub> H <sub>20</sub> O <sub>11</sub> | 1.123         | 283.06140(36),268.03796(100),113.02448(12),99.01(7),99.0882.01(5),85.02940(13)                                                                      | Isomer of S21                                                                                                | Flavone- <i>O</i> -glycosides | /                |
| S7  | 7.25                    | 445.07798          | –           | C <sub>21</sub> H <sub>18</sub> O <sub>11</sub> | 0.776         | 269.04590(100)                                                                                                                                      | Isomer of S39                                                                                                | Flavone- <i>O</i> -glycosides | /                |
| S8  | 10.27                   | 503.12007          | –           | C <sub>24</sub> H <sub>24</sub> O <sub>12</sub> | 1.134         | 459.13107(3),428.07468(4),299.05685(61),284.03314(100),255.06674(33),211.04065(4),151.00386(3)                                                      | 6"- <i>O</i> -acetyl<br>homoplantaginin OR<br>Ladanetin-6- <i>O</i> -β-(6"- <i>O</i> -<br>acetyl)glucoside   | Flavone- <i>O</i> -glycosides | F.I              |
| S9  | 7.86                    | 907.19435          | –           | C <sub>43</sub> H <sub>40</sub> O <sub>22</sub> | 0.556         | 676.36243(4),547.01318(4),388.12686(4),345.12686(4),299.05661(100),284.03271(9),269.04614(12),256.09375(4),267.03131(10)                            | Isomer of Solanoflavone                                                                                      | Flavone- <i>O</i> -glycosides | F.I              |
| S10 | 6.61                    | 731.12622          | –           | C <sub>36</sub> H <sub>28</sub> O <sub>17</sub> | 1.159         | 285.04032(0.6),269.04575(100),267.02943(0.4),251.22560(2),113.02448(8).                                                                             | 5,7,4',5'',3''',4''''-<br>hexahydroxy-3''- <i>O</i> -β-<br>glucosyl-3',7''- <i>O</i> -biflavone<br>OR isomer | Flavone- <i>O</i> -glycosides | F.I              |
| S11 | 7.51                    | 491.11986          | –           | C <sub>23</sub> H <sub>24</sub> O <sub>12</sub> | 0.734         | 329.06747(42),314.04388(100),299.02063(18),269.04602(2)                                                                                             | Trihydroxy-<br>dimethoxyflavone <i>O</i> -<br>glucoside                                                      | Flavone- <i>O</i> -glycosides | /                |
| S12 | 4.56                    | 607.13127          | –           | C <sub>27</sub> H <sub>28</sub> O <sub>16</sub> | 1.338         | 431.09888(3),269.04596(100),251.03477(0.4),175.0                                                                                                    | Trihydroxyflavone <i>O</i> -                                                                                 | Flavone- <i>O</i> -glycosides | F.I              |

|     |       |           |   |                                                 |        |                                                                                                                                                                       |                                                                                       |                                 |                 |
|-----|-------|-----------|---|-------------------------------------------------|--------|-----------------------------------------------------------------------------------------------------------------------------------------------------------------------|---------------------------------------------------------------------------------------|---------------------------------|-----------------|
|     |       |           |   |                                                 |        | 2(1),113.02452(5),95.01376(1),85.02924(3)                                                                                                                             | glucoside-(1→2)- <i>O</i> -glucuronide                                                |                                 |                 |
| S13 | 9.88  | 445.07796 | - | C <sub>21</sub> H <sub>18</sub> O <sub>11</sub> | 0.325  | 269.04587(100),251.03519(0.3),241.05064(0.1),225.05563(0.1),223.04022(0.3),113.02444(4),99.00870(2),85.02940(4)                                                       | Baicalein 6- <i>O</i> -glucuronide                                                    | Flavone- <i>O</i> -glycosides   | /               |
| S14 | 10.47 | 637.15677 | - | C <sub>32</sub> H <sub>30</sub> O <sub>14</sub> | 0.771  | 283.06235(0.5),269.04596(100),251.03542(0.3),230.95995(1),223.06(1),205.05(2)                                                                                         | Isomer of chrysoeriol-7- <i>O</i> -[2''- <i>O</i> - <i>E</i> -feruloyl]-β-D-glucoside | Others                          | F.I             |
| S15 | 8.26  | 863.20450 | - | C <sub>42</sub> H <sub>40</sub> O <sub>20</sub> | 0.56   | 271.06174(50),269.04608(100),211.07(2),165.62(0.4),113.02454(5)                                                                                                       | Unknow                                                                                | /                               | /               |
| S16 | 9.32  | 473.10911 | - | C <sub>23</sub> H <sub>22</sub> O <sub>11</sub> | 0.371  | 283.06165(33),269.04611(100),268.03824(45),161.00911(6)                                                                                                               | Baicalein 7- <i>O</i> -ethylglucuronide OR isomer                                     | Flavone- <i>O</i> -glycosides   | /               |
| S17 | 8.49  | 445.07793 | - | C <sub>21</sub> H <sub>18</sub> O <sub>11</sub> | 0.295  | 269.04596(100),251.03575(0.1),241.05104(0.6),225.05591(2),197.06102(2),113.02441(4),99.00877(2),85.02941(4)                                                           | Norwogonin 7- <i>O</i> -glucuronide                                                   | Flavone- <i>O</i> -glycoside    | /               |
| S18 | 7.13  | 505.09920 | - | C <sub>23</sub> H <sub>22</sub> O <sub>13</sub> | 0.864  | 329.06656(28),314.04343(100),299.02014(27),269.04565(5),196(3),113.02434(11),85.02942(13)                                                                             | Isomer of viscidulin II 2'- <i>O</i> -glucuronide                                     | Flavone- <i>O</i> -glycosides   | /               |
| S19 | 9.21  | 431.09677 | + | C <sub>21</sub> H <sub>18</sub> O <sub>10</sub> | -1.167 | 271.05957(6),255.06471(100)                                                                                                                                           | Chrysin 7- <i>O</i> -glucuronide                                                      | Flavone- <i>O</i> -glycoside    | /               |
| S20 | 7.7   | 445.07795 | - | C <sub>21</sub> H <sub>18</sub> O <sub>11</sub> | 0.709  | 269.04611(100)                                                                                                                                                        | Isomer of S39                                                                         | Flavone- <i>O</i> -glycosides   | /               |
| S21 | 9.13  | 459.09374 | - | C <sub>22</sub> H <sub>20</sub> O <sub>11</sub> | 0.992  | 283.06149(47),268.03806(100),239.07167(0.3),211.03976(0.1),175.02492(1.0),139.00372(0.4),129.01933(2),117.01934(3),113.02438(17),99.00875(7),85.02939(23),71.01373(7) | Oroxilin A 7- <i>O</i> -glucuronide                                                   | Flavone- <i>O</i> -glycosides   | RS <sup>2</sup> |
| S22 | 3.86  | 461.07327 | - | C <sub>21</sub> H <sub>18</sub> O <sub>12</sub> | 1.564  | 371.07819(6),341.06790(20),299.05603(12),285.04077(100),271.06216(3),245.05(3),227.07204(4),211.04077(3)                                                              | Tetrahydroxyflavone <i>O</i> -glucuronide (Isomer of Scutellarin)                     | Flavone- <i>O</i> -glycosides   | /               |
| S23 | 9.77  | 461.10910 | - | C <sub>22</sub> H <sub>22</sub> O <sub>11</sub> | 0.359  | 299.05609(38),284.03268(83),283.02502(100),269.04312(2),268.03726(1),253.05077(20),211.04008(9),173.06068(2)                                                          | Trihydroxy-methoxyflavone- <i>O</i> -glucoside                                        | Flavone- <i>O</i> -glycosides   | /               |
| S24 | 4.61  | 477.10424 | - | C <sub>22</sub> H <sub>22</sub> O <sub>12</sub> | 0.819  | 301.07242(70),286.04889(100),181.01442(21),165.99094(13)                                                                                                              | 5,7,2'-Trihydroxy-6-methoxyflavanone 7- <i>O</i> -glucuronide                         | Flavanone- <i>O</i> -glycosides | /               |
| S25 | 9.84  | 459.09363 | - | C <sub>22</sub> H <sub>20</sub> O <sub>11</sub> | 0.752  | 283.06149(75),268.03806(100),239.07164(0.3),175.02492(1),139.00372(0.4),129.01933(2),113.02438(24),99.00875(12),85.02939(22),71.01373(7)                              | Wogonoside                                                                            | Flavone- <i>O</i> -glycosides   | RS              |
| S26 | 5.27  | 475.08834 | - | C <sub>22</sub> H <sub>20</sub> O <sub>12</sub> | 0.296  | 299.05655(58),284.03311(100)                                                                                                                                          | Isomer of 37 (trihydroxy-methoxyflavone <i>O</i> -glucuronide)                        | Flavone- <i>O</i> -glycosides   | /               |

|     |       |           |   |                                                 |        |                                                                                                                                                                            |                                                                           |                                 |     |
|-----|-------|-----------|---|-------------------------------------------------|--------|----------------------------------------------------------------------------------------------------------------------------------------------------------------------------|---------------------------------------------------------------------------|---------------------------------|-----|
| S27 | 9.47  | 475.08809 | - | C <sub>22</sub> H <sub>20</sub> O <sub>12</sub> | -0.23  | 299.05637(50),284.03305(100),270.04959(5)                                                                                                                                  | Isomer of 37 (trihydroxy-methoxyflavone <i>O</i> -glucuronide)            | Flavone- <i>O</i> -glycosides   | /   |
| S28 | 7.98  | 447.09353 | - | C <sub>21</sub> H <sub>20</sub> O <sub>11</sub> | 0.549  | 271.06250(100),253.05099(8),243.06644(25)                                                                                                                                  | Dihydrobaicalin                                                           | Flavanone- <i>O</i> -glycosides | /   |
| S29 | 8.78  | 445.07795 | - | C <sub>21</sub> H <sub>18</sub> O <sub>11</sub> | 0.709  | 269.04596(100),268.03815(3),267.03036(1),241.05142(0.5),225.05623(1),197.06119(1),113.02449(3),99.00886(1),85.02956(3),71.01391(2)                                         | Norwogonin 8- <i>O</i> -glucuronide                                       | Flavone- <i>O</i> -glycosides   | /   |
| S30 | 4.89  | 621.14659 | - | C <sub>28</sub> H <sub>30</sub> O <sub>16</sub> | 0.776  | 445.11441(70),430.09079(59),283.06143(49),268.03781(100),267.03018(93),239.03525(2),175.02502(3),117.02(3),113.02444(25),103.00378(3),99.00882(7),95.01390(7),85.02956(21) | Dihydroxy-methoxyflavone <i>O</i> -glucuronide-(1→6)- <i>O</i> -glucoside | Flavone- <i>O</i> -glycosides   | F.I |
| S31 | 9.61  | 415.10355 | - | C <sub>21</sub> H <sub>20</sub> O <sub>9</sub>  | 0.228  | 295.06122(3),269.04590(2),253.05075(100),224.04839(0.2),209.06085(2)                                                                                                       | Chrysin 7- <i>O</i> -glucoside or isomer                                  | Flavone- <i>O</i> -glycosides   | F.I |
| S32 | 6.02  | 607.13129 | - | C <sub>27</sub> H <sub>28</sub> O <sub>16</sub> | 1.371  | 445.18335(1),269.04572(100),113.02447(1)                                                                                                                                   | Trihydroxyflavone <i>O</i> -glucuronide-(1→2)- <i>O</i> -glucoside        | Flavone- <i>O</i> -glycosides   | F.I |
| S33 | 10.27 | 489.10403 | - | C <sub>23</sub> H <sub>22</sub> O <sub>12</sub> | 0.37   | 313.07257(24),298.04871(100),283.02521(29),281.04529(4),269.04565(2),239.03593(2),211.04042(5)                                                                             | 5,7-Dihydroxy-8,2'-dimethoxyflavone 7- <i>O</i> -glucuronide              | Flavone- <i>O</i> -glycosides   | /   |
| S34 | 4.13  | 507.11461 | - | C <sub>23</sub> H <sub>24</sub> O <sub>13</sub> | 0.387  | 492.09247(1),345.06189(15),330.03836(100),315.01505(14)                                                                                                                    | Viscidulin III 2'- <i>O</i> -glucoside                                    | Flavone- <i>O</i> -glycosides   | /   |
| S35 | 9.35  | 445.11423 | - | C <sub>22</sub> H <sub>22</sub> O <sub>10</sub> | 0.472  | 285.07462(100),270.05118(17),241.04947(0.1)                                                                                                                                | Wogonin 5-glucoside                                                       | Flavone- <i>O</i> -glycosides   | /   |
| S36 | 7.59  | 475.08836 | - | C <sub>22</sub> H <sub>20</sub> O <sub>12</sub> | 0.339  | 299.05658(100),284.03305(59),270.10849(0.5)                                                                                                                                | Isomer of 37 (trihydroxy-methoxyflavone <i>O</i> -glucuronide)            | Flavone- <i>O</i> -glycosides   | /   |
| S37 | 8.84  | 475.08832 | - | C <sub>22</sub> H <sub>20</sub> O <sub>12</sub> | 0.254  | 299.05643(30),284.03299(100),267.02997(0.3),239.03540(0.2),228.04262(0.4),200.04805(1),153.01936(1),129.01955(1),113.02440(6),85.02940(7)                                  | 5,7,2'-Trihydroxy-6-methoxyflavone 7- <i>O</i> -glucuronide               | Flavone- <i>O</i> -glycosides   | /   |
| S38 | 10.95 | 551.13891 | + | C <sub>25</sub> H <sub>26</sub> O <sub>14</sub> | -1.128 | 375.10657(100),360.08340(9),345.05960(13),342.07269(3),329.06488(0.3),327.04913(4),227.05461(3),177.05432(1)                                                               | Dihydroxy-tetramethoxyflavone <i>O</i> -glucuronide                       | Flavone- <i>O</i> -glycoside    | /   |
| S39 | 6.59  | 445.07991 | - | C <sub>21</sub> H <sub>18</sub> O <sub>11</sub> | 2.275  | 269.04605(100),251.03560(1),241.05084(1),225.05608(0.4),197.06128(0.5),129.01952(1),117.01965(1),113.02452(6),99.00889(3),85.02959(7)                                      | Baicalin                                                                  | Flavone- <i>O</i> -glycoside    | RS  |
| S40 | 3.7   | 547.14611 | - | C <sub>26</sub> H <sub>28</sub> O <sub>13</sub> | 0.724  | 547.14618(30),529.13562(3),487.12500(2),469.11435(4),457.11453(40),439.10385(4),427.10352(66),409.09323(4),397.09296(9),367.08243(64),349.07202(7),337.07214(100)          | Chrysin 6- <i>C</i> -arabinoside 8- <i>C</i> -glucoside                   | Flavone- <i>C</i> -glycosides   | RS  |



|     |       |           |   |                                                   |        |                                                                                                                                             |                                                                       |                                  |     |
|-----|-------|-----------|---|---------------------------------------------------|--------|---------------------------------------------------------------------------------------------------------------------------------------------|-----------------------------------------------------------------------|----------------------------------|-----|
| S41 | 3.87  | 565.15757 | - | C <sub>26</sub> H <sub>30</sub> O <sub>14</sub>   | 2.285  | 367.08337(1),337.07230(2),329.08737(8),299.07730(9),269.6674(40),239.05615(97),209.04556(100)                                               | Isomer of Pinobanksin 8- <i>C</i> -arabinoside 6- <i>C</i> -glucoside | Flavanonol- <i>C</i> -glycosides | F.I |
| S42 | 3.57  | 565.15700 | - | C <sub>26</sub> H <sub>30</sub> O <sub>14</sub>   | 1.276  | 329.08783(4),299.07840(10),269.06689(41),239.05627(100),209.04572(95)                                                                       | Isomer of Pinobanksin 8- <i>C</i> -arabinoside 6- <i>C</i> -glucoside | Flavanone- <i>C</i> -glycosides  | F.I |
| S43 | 3.24  | 565.15653 | - | C <sub>26</sub> H <sub>30</sub> O <sub>14</sub>   | 0.445  | 329.08795(7),299.07770(10),269.06622(43),239.05637(100),209.04559(89)                                                                       | Isomer of Pinobanksin 8- <i>C</i> -arabinoside 6- <i>C</i> -glucoside | Flavanone- <i>C</i> -glycosides  | F.I |
| S44 | 5.18  | 415.10373 | - | C <sub>21</sub> H <sub>20</sub> O <sub>9</sub>    | 0.662  | 325.07175(4),307.06094(2),295.06113(100),277.05060(1),267.06644(32),253.05106(0.5),227.07188(0.5),179.03456(0.6),149.02438(2)               | Isomer of S48<br>(Dihydroxyflavone <i>C</i> -glucoside)               | Flavone- <i>C</i> -glycosides    | /   |
| S45 | 3.13  | 577.15683 | - | C <sub>27</sub> H <sub>30</sub> O <sub>14</sub>   | 0.955  | 577.15729(14),487.12531(11),457.11462(32),439.10440(3),397.09293(6),367.08258(58),337.07224(100)                                            | Chrysin 6,8-di- <i>C</i> -glucopyranoside                             | Flavone- <i>C</i> -glycosides    | /   |
| S46 | 4.25  | 547.14609 | - | C <sub>26</sub> H <sub>28</sub> O <sub>13</sub>   | 0.687  | 547.14642(17),529.13593(3),487.12570(14),457.11465(22),427.10376(15),409.09360(10),397.09317(8),367.08258(83),337.07224(100)                | Chrysin 6- <i>C</i> -glucoside 8- <i>C</i> -arabinoside               | Flavone- <i>C</i> -glycosides    | RS  |
| S47 | 5.1   | 547.14620 | - | C <sub>26</sub> H <sub>28</sub> O <sub>13</sub>   | 0.888  | 547.14624(16),487.12512(17),457.11450(23),427.10364(40),397.09360(31),367.08234(100),337.07205(70),309.07745(6)                             | 6-hexosyl-8- <i>C</i> -pentosyl chrysin                               | Flavone- <i>C</i> -glycosides    | /   |
| S48 | 8.03  | 417.11762 | + | C <sub>21</sub> H <sub>20</sub> O <sub>9</sub>    | -0.932 | 325.07217(33),295.06152(100),267.06662(25),253.05095(3),223.07791(0.5),151.05568(0.1)                                                       | Chrysin 6- <i>C</i> -glucoside                                        | Flavone- <i>C</i> -glycoside     | /   |
| S49 | 11.52 | 343.08222 | - | C <sub>18</sub> H <sub>16</sub> O <sub>7</sub>    | -0.309 | 328.06003(12),313.03540(100),298.01190(16),270.01706(2)                                                                                     | Skullcapflavone                                                       | Flavones                         | /   |
| S50 | 4.91  | 409.02370 | - | C <sub>17</sub> H <sub>14</sub> O <sub>10</sub> S | 0.512  | 329.06705(100),314.04361(62),299.01993(27),195.03003(2),180.00662(3),164.98241(1),133.02942(2)                                              | 2',5,6-Trihydroxy-7,8-dimethoxyflavone 6- <i>O</i> -sulfate           | Flavones                         | /   |
| S51 | 10.23 | 329.06682 | - | C <sub>17</sub> H <sub>14</sub> O <sub>7</sub>    | 0.438  | 314.04337(49),299.01974(100),285.04105(2),271.02505(2),255.02969(0.9),227.03496(0.3),180.00645(9),164.98270(6),133.02942(7)                 | Isomer of S54 (Trihydroxy-dimethoxyflavone)                           | Flavones                         | /   |
| S52 | 11.16 | 313.07190 | - | C <sub>17</sub> H <sub>14</sub> O <sub>6</sub>    | 0.443  | 298.04861(100),283.02521(85),255.03027(2),239.03503(2),211.04025(19),173.06067(5)                                                           | Isomer of S63 (Dihydroxy-dimethoxyflavone)                            | Flavones                         | /   |
| S53 | 12.95 | 329.06680 | - | C <sub>17</sub> H <sub>14</sub> O <sub>7</sub>    | 0.377  | 314.04309(61),299.01953(100),285.04083(3),271.02472(2),255.02936(0.3),227.0462(0.3),205.01410(0.8),180.00636(2),152.01122(2),133.02835(0.5) | 5,8,2'-Trihydroxy-6,7-dimethoxyflavone                                | Flavones                         | /   |
| S54 | 11.7  | 329.06679 | - | C <sub>17</sub> H <sub>14</sub> O <sub>7</sub>    | 0.346  | 314.04349(100),299.01993(80),255.02878(0.7),180.00696(2),165.99080(12),137.99586(6)                                                         | 5,7,6'-Trihydroxy-8,2'-dimethoxyflavone                               | Flavones                         | /   |
| S55 | 10.26 | 313.07188 | - | C <sub>17</sub> H <sub>14</sub> O <sub>6</sub>    | 0.379  | 298.04871(100),283.02530(87),269.04614(78),255.12172(4),211.04001(18),167.04(5),145.02962(15),91.02(28)                                     | Isomer of 6-Methoxywogonin<br>(Dihydroxy-dimethoxyflavone)            | Flavones                         | /   |

|     |       |           |   |                                                |        |                                                                                                                                                                                            |                                          |            |    |
|-----|-------|-----------|---|------------------------------------------------|--------|--------------------------------------------------------------------------------------------------------------------------------------------------------------------------------------------|------------------------------------------|------------|----|
| S56 | 2.89  | 303.05117 | - | C <sub>15</sub> H <sub>12</sub> O <sub>7</sub> | 0.475  | 285.04059(2),241.05075(2),217.05060(9),193.05551(4),177.01930(30),149.02429(10),125.02426(100)                                                                                             | 5,7,3,2',6'-Pentahydroxyflavanone        | Flavanones | /  |
| S57 | 6.95  | 347.07574 | + | C <sub>17</sub> H <sub>14</sub> O <sub>8</sub> | -1.164 | 347.07541(63),332.05203(100),314.04147(35),286.04645(2),183.02850(3),169.01292(7),142.02594(3)                                                                                             | Viscidulin III                           | Flavones   | RS |
| S58 | 5.62  | 285.04059 | - | C <sub>15</sub> H <sub>10</sub> O <sub>6</sub> | 0.452  | 285.04077(100),267.03012(3),241.05083(20),217.05066(10),199.04018(15),197.06(2),175.04(5),173.06079(2),169.01425(3),151.00365(80),133.02959(11),107.01385(8)                               | Scutellarein                             | Flavones   | RS |
| S59 | 11.86 | 271.05975 | + | C <sub>15</sub> H <sub>10</sub> O <sub>5</sub> | -1.291 | 271.05942(100),253.04897(1),225.05417(0.2),169.01289(0.2),153.01797(4)                                                                                                                     | Baicalein                                | Flavones   | RS |
| S60 | 13.72 | 283.06125 | - | C <sub>16</sub> H <sub>12</sub> O <sub>5</sub> | 0.188  | 268.03809(100),240.04349(1),239.03520(1),224.04802(1),212.04816(0.3),211.04041(0.3),198.03249(1),196.05321(1),184.05307(1),165.99049(1),163.00372(2),137.02448(1),110.00012(0.4)           | Wogonin                                  | Flavones   | RS |
| S61 | 14.19 | 313.07224 | - | C <sub>17</sub> H <sub>14</sub> O <sub>6</sub> | 0.479  | 298.04852(100),283.02515(87),269.04590(21),255.03026(2),239.03487(0.3),211.04027(18),195.03015(0.3),180.00664(5),173.06090(0.3),164.98279(2),152.01154(3),117.03396(0.2)                   | 5,8-Dihydroxy-6,7-dimethoxyflavone       | Flavones   | /  |
| S62 | 14.15 | 283.06129 | - | C <sub>16</sub> H <sub>12</sub> O <sub>5</sub> | 0.33   | 268.03809(100),240.04308(0.4),239.03503(0.7),224.04767(0.4),212.04845(0.4),211.03987(0.2),198.03233(1),196.05310(1),184.05318(1),165.99036(0.3),163.00372(2),137.02437(0.6),110.00023(0.4) | Oroxylin A                               | Flavones   | RS |
| S63 | 13.9  | 315.08592 | + | C <sub>17</sub> H <sub>14</sub> O <sub>6</sub> | -1.253 | 298.04868(68),283.02527(100),255.03012(2),211.04028(2),183.04514(2),173.06091(4),164.98(2),155.05032(3)                                                                                    | Skullcapflavone I                        | Flavones   | /  |
| S64 | 7.67  | 287.05625 | - | C <sub>15</sub> H <sub>12</sub> O <sub>6</sub> | 0.483  | 287.05701(4),269.04599(3),225.05568(1),215.03513(9),201.05588(9),177.06(2),173.06(1),161.02443(17),151.00369(3),133.02956(4),125.02438(100)                                                | Isomer of S71 (Tetrahydroxyflavanone)    | Flavanones | /  |
| S65 | 12.06 | 299.05618 | - | C <sub>16</sub> H <sub>12</sub> O <sub>6</sub> | 0.23   | 284.03296(100),256.03872(2),255.03044(0.2),227.03548(0.1),200.04811(2),165.99077(8),137.99599(4),110.00093                                                                                 | Trihydroxy-methoxyflavone                | Flavones   | /  |
| S66 | 14.5  | 373.09289 | - | C <sub>19</sub> H <sub>18</sub> O <sub>8</sub> | -0.002 | 358.06985(22),343.04617(100),328.02286(23),325.03555(2),315.05099(1),313.03574(0.6),300.02783(5),285.00458(1),227.03514(4),194.99355(6),169.01425(3),133.02936(1)                          | Skullcapflavone II                       | Flavones   | /  |
| S67 | 11.38 | 269.04552 | - | C <sub>15</sub> H <sub>10</sub> O <sub>5</sub> | -0.099 | 269.04584(100),241.05078(4),225.05591(8),213.05597(3),197.06100(12),181.06610(2),169.06595(3)                                                                                              | Apigenin                                 | Flavones   | RS |
| S68 | 14.75 | 283.06122 | - | C <sub>16</sub> H <sub>12</sub> O <sub>5</sub> | 0.082  | 268.03796(100),240.04321(1),239.03526(1),224.04819(0.4),212.04845(0.4),211.04047(0.6),198.03242(                                                                                           | Isomer of S60 (Dihydroxy-methoxyflavone) | Flavones   | /  |

|     |       |           |   |                                                  |        |                                                                                                                                                                                                |                                                              |            |     |
|-----|-------|-----------|---|--------------------------------------------------|--------|------------------------------------------------------------------------------------------------------------------------------------------------------------------------------------------------|--------------------------------------------------------------|------------|-----|
| S69 | 10.5  | 313.0719  | - | C <sub>17</sub> H <sub>14</sub> O <sub>6</sub>   | 0.443  | 0.6),196.05336(0.4),184.05302(0.6),171.04515(0.2),165.99080(0.5),137.02440(0.4)<br>298.04874(100),283.02530(87),269.04593(21),255.03079(4),211.04013(18),173.06114(3),145.02940(3),91.02199(8) | Isomer of 6-Methoxywogonin (Dihydroxy-dimethoxyflavone)      | Flavones   | F.I |
| S70 | 13.67 | 537.08295 | - | C <sub>30</sub> H <sub>18</sub> O <sub>10</sub>  | 0.428  | 391.04648(76),373.03580(10),347.05630(16),335.05679(5),319.06134(7),291.06656(2),245.00926(100),239.03531(1),217.01433(3)                                                                      | 8,8'-Biapigenin                                              | Flavones   | /   |
| S71 | 7.24  | 287.05622 | - | C <sub>15</sub> H <sub>12</sub> O <sub>6</sub>   | 0.379  | 269.04581(0.6),243.06630(0.1),225.05594(0.1),179.0350(0.1),161.02428(25),151.00359(1),135.04514(2),125.02432(100)                                                                              | Eriodictyol                                                  | Flavanone  | /   |
| S72 | 9.29  | 349.00236 | - | C <sub>15</sub> H <sub>10</sub> O <sub>8</sub> S | -0.003 | 269.04593(100),241.05110(0.3),225.05605(1),225.05605(0.9),197.06(1),181.06602(0.2),139.00328(0.1)                                                                                              | Baicalein 6-O-sulfate                                        | Flavones   | /   |
| S73 | 11.61 | 299.05616 | - | C <sub>16</sub> H <sub>12</sub> O <sub>6</sub>   | 0.163  | 299.06(100),284.03290(49),267.03012(11),255.06651(24),240.04300(12),231.07(7),227.07092(0.5),212.04813(4),153.01930(0.2),151.00368(82),107.01389(8)                                            | Trihydroxy-methoxyflavone (trihydroxy and methoxy on A ring) | Flavones   | /   |
| S74 | 10.27 | 283.06137 | - | C <sub>16</sub> H <sub>12</sub> O <sub>5</sub>   | 0.612  | 268.03815(100),255.03041(1),239.03531(1),224.04813(1),211.04037(1),198.03255(1),196.05328(1),184.05304(1),183.04530(0.3),173.06088(1),163.00375(2),137.02452(1),110.00090(0.3)                 | Isomer of S60 (Dihydroxy-methoxyflavone)                     | Flavones   | /   |
| S75 | 14.6  | 345.09647 | + | C <sub>18</sub> H <sub>16</sub> O <sub>7</sub>   | -1.186 | 345.09631(100),330.07288(34),315.04938(92),312.06241(18),297.03891(31)                                                                                                                         | Tenaxin I                                                    | Flavones   | /   |
| S76 | 10.72 | 299.05611 | - | C <sub>16</sub> H <sub>12</sub> O <sub>6</sub>   | -0.004 | 284.03275(100),271.06204(6),255.06720(2),227.07127(9),212.04810(12),211.03995(17),183.02997(2),165.01932(6),153.01926(36),133.02950(20)                                                        | 4'-hydroxy wogonin                                           | Flavones   | RS  |
| S77 | 10.47 | 315.05119 | - | C <sub>16</sub> H <sub>12</sub> O <sub>7</sub>   | 0.521  | 300.06476(69),284.02829(19),253.01425(30),227.03526(100),212.04431(7),165.99086(58),137.99605(11),110.00083(9)                                                                                 | Neptin                                                       | Flavones   | F.I |
| S78 | 13.75 | 253.05057 | - | C <sub>15</sub> H <sub>10</sub> O <sub>4</sub>   | -0.245 | 253.05109(100),209.15495(3),151.00400(0.2),143.05037(1),107.01380(1)                                                                                                                           | Chrysin                                                      | Flavones   | RS  |
| S79 | 10.53 | 283.06165 | - | C <sub>16</sub> H <sub>12</sub> O <sub>5</sub>   | 1.601  | 268.03815(100),255.03064(0.1),224.04797(1),212.04796(0.3),211.04030(1),198.03264(1),196.05330(1),184.05304(1),165.99068(0.4),163.00375(2),137.02444(1),110.00021(0.3)                          | Isomer of S60 (Dihydroxy-methoxyflavone)                     | Flavones   | /   |
| S80 | 10.65 | 301.07175 | - | C <sub>16</sub> H <sub>14</sub> O <sub>6</sub>   | -0.038 | 286.04865(100),283.02444(4),268.03766(0),255.23323(10),185.06107(5),180.00667(16),165.99078(45),152.01132(5),137.99594(9),119.05031(8)                                                         | Trihydroxy-methoxyflavanone                                  | Flavanones | F.I |

|     |       |           |   |                                                  |        |                                                                                                                                                               |                                                                                 |               |     |
|-----|-------|-----------|---|--------------------------------------------------|--------|---------------------------------------------------------------------------------------------------------------------------------------------------------------|---------------------------------------------------------------------------------|---------------|-----|
| S81 | 11.09 | 283.06149 | - | C <sub>16</sub> H <sub>12</sub> O <sub>5</sub>   | 1.036  | 268.04(100),255.03041(),224.04813(0.5),212.04037(0.4),211.04037(0.2),198.03255(1),196.05328(1),184.05(1),165.99072(1),163.00375(2),137.02438(1),10.00014(0.4) | Isomer of S60 (Dihydroxy-methoxyflavone)                                        | Flavones      | /   |
| S82 | 10.87 | 329.06678 | - | C <sub>17</sub> H <sub>14</sub> O <sub>7</sub>   | 0.316  | 314.04358(62),299.01959(81)283.26471(26),268.03827(25)                                                                                                        | Isomer of S54 (Trihydroxy-dimethoxyflavone)                                     | Flavones      | /   |
| S83 | 0.81  | 191.0197  | - | C <sub>6</sub> H <sub>8</sub> O <sub>7</sub>     | -0.135 | 173.00926(3),147.03001(1),129.01953(8),111.00883(4),103.00378(4),85.03(100),72.99311(10)                                                                      | D-Galactaric acid, 1,5-lactone OR isomer                                        | Others        | F.I |
| S84 | 1.04  | 191.01969 | - | C <sub>6</sub> H <sub>8</sub> O <sub>7</sub>     | -0.135 | 173.00949(4),129.01956(8),117.01949(2),111.00882(100),87.00871(42),85.02947(34)                                                                               | Isomer of D-Galactaric acid, 1,5-lactone                                        | Others        | F.I |
| S85 | 1.27  | 503.14106 | - | C <sub>21</sub> H <sub>28</sub> O <sub>14</sub>  | 0.857  | 341.08823(),323.07770(13),281.06732(20),251.05649(10),223.97(2),221.04567(14),179.03532(44),161.02457(100),135.04533(12)                                      | 1-caFFEyllaminaribiose                                                          | Others        | F.I |
| S86 | 8.29  | 417.11947 | - | C <sub>21</sub> H <sub>22</sub> O <sub>9</sub>   | 0.874  | 255.06686(10),211.07681(100),197.06166(0.2),169.06604(5),112.98558(2)                                                                                         | Gaylussacin                                                                     | Stilbene (芪类) | /   |
| S87 | 22.48 | 255.23276 | - | C <sub>16</sub> H <sub>32</sub> O <sub>2</sub>   | -0.758 | 255.23302(100),237.22174(0.2),211.20708(0.2)                                                                                                                  | Isomer of Hexadecanoic acid                                                     | Alkane        | F.I |
| S88 | 17.94 | 295.22773 | - | C <sub>18</sub> H <sub>32</sub> O <sub>3</sub>   | -0.468 | 277.21747(25),211.13409(1),195.13907(2),183.13905(100)                                                                                                        | Isomer of 10-Hydroxyoctadecadienoic acid                                        | Alkane        | F.I |
| S89 | 6.12  | 301.07177 | - | C <sub>16</sub> H <sub>14</sub> O <sub>6</sub>   | 0.029  | 161.02446(23),139.04013(100),135.04533(22),133.00966(16),124.01660(11),107.05027(10)                                                                          | 3-Hydroxy-4-O-glucosylbenzyl alcohol OR isomer                                  | Others        | F.I |
| S90 | 19.97 | 324.28931 | + | C <sub>20</sub> H <sub>37</sub> O <sub>2</sub> N | -1.221 | 306.27869(6),219.05690(6),147.11668(2),123.11678(5),109.10135(7),95.08574(14),81.07028(17),62.06064(100)                                                      | Isomer of Linoleoyl Ethanolamide                                                | Others        | F.I |
| S91 | 0.87  | 381.07891 | + | C <sub>17</sub> H <sub>16</sub> O <sub>10</sub>  | -7.12  | 381.08(100),219.02664(30),201.01584(25)                                                                                                                       | Isomer of 5-O-β-D-glucopyranosyl-6-hydroxyangelicin                             | Others        | F.I |
| S92 | 6.17  | 303.08598 | + | C <sub>16</sub> H <sub>14</sub> O <sub>6</sub>   | -1.104 | 285.07507(15),267.06482(1),257.08026(32),242.05684(8),229.08551(57),179.03380(2),167.03363(100),163.03865(3),133.02831(24),123.04404(69),107.04928(44)        | 3,4-Dihydroxy-7-O-caFFEoylbenzyl alcohol or isomer                              | Others        | F.I |
| S93 | 17.49 | 701.37151 | + | C <sub>35</sub> H <sub>56</sub> O <sub>14</sub>  | -3.953 | 701.37067(100),539.31824(96),191.09856(1),105.03367(7)                                                                                                        | Isomer of sileneoside H                                                         | /             | /   |
| S94 | 4.17  | 445.07617 | + | C <sub>21</sub> H <sub>16</sub> O <sub>11</sub>  | -0.826 | 427.06525(4),409.05493(9),381.05975(1),343.04465(6),319.04428(23),287.05(10),275.05447(7),263.05466(5),153.01807(100),141.01810(22)                           | Benzoic acid, 3,4,5-trihydroxy-, 1,1'-(2-methoxy-1,4-phenylene) ester OR isomer | Others        | F.I |

|      |       |           |   |                                                 |        |                                                                                                                                                                 |                                                                                              |                                |     |
|------|-------|-----------|---|-------------------------------------------------|--------|-----------------------------------------------------------------------------------------------------------------------------------------------------------------|----------------------------------------------------------------------------------------------|--------------------------------|-----|
| S95  | 5.67  | 339.10696 | + | C <sub>16</sub> H <sub>18</sub> O <sub>8</sub>  | -1.427 | 321.07611(3),234.03915(37),177.05437(100),145.02809(31),105.03366(13)                                                                                           | Unknown                                                                                      | /                              | F.I |
| S96  | 11.77 | 555.09167 | + | C <sub>30</sub> H <sub>18</sub> O <sub>11</sub> | -0.933 | 453.04468(11),435.03403(20),419.03882(10),269.03884(18),241.04912(12),121.02847(19),105.03368(34)                                                               | Isomer of hegoflavone A                                                                      | Flavones                       | /   |
| S97  | 10.39 | 347.07572 | + | C <sub>17</sub> H <sub>14</sub> O <sub>8</sub>  | -1.221 | 347.07565(100),332.05206(26),317.02866(28),314.04156(37)                                                                                                        | Isomer of S57<br>(Tetrahydroxy-dimethoxyflavone)                                             | Flavones                       | /   |
| S98  | 14    | 375.10704 | + | C <sub>19</sub> H <sub>18</sub> O <sub>8</sub>  | -1.077 | 360.08298(30),345.05960(100),342.07272(15),327.04913(16),227.05446(8),213.03889(9)                                                                              | 5,6'-Dihydroxy-6,7,8,2'-tetramethoxyflavone                                                  | Flavones                       | /   |
| S99  | 11.14 | 563.13929 | + | C <sub>26</sub> H <sub>26</sub> O <sub>14</sub> | -0.429 | 315.08569(100),300.06229(19),285.03885(13),282.05182(7)                                                                                                         | Dihydroxy-dimethoxyflavone <i>O</i> -6"-malonyl glucoside                                    | Flavone- <i>O</i> -glycoside   | F.I |
| S100 | 10.35 | 549.12346 | + | C <sub>25</sub> H <sub>24</sub> O <sub>14</sub> | -0.768 | 301.06992(100),286.04651(16)                                                                                                                                    | Trihydroxy-methoxyflavone <i>O</i> -6"-malonyl glucoside                                     | Flavone- <i>O</i> -glycoside   | F.I |
| S101 | 5.22  | 417.11739 | + | C <sub>21</sub> H <sub>20</sub> O <sub>9</sub>  | -1.483 | 325.07217(5),295.06152(100),267.06662(31),245.04578(1),223.07791(0.5),187.07007(0.5),149.02457(2)                                                               | Chrysin 8- <i>C</i> -glucoside                                                               | Flavone- <i>C</i> -glycoside   | /   |
| S102 | 5.51  | 771.19748 | + | C <sub>33</sub> H <sub>38</sub> O <sub>21</sub> | -0.46  | 285.07526(21),271.05966(100),159.02872(0.8),127.03899(3),85.02879(6)                                                                                            | Baicalein 7- <i>O</i> -β-D-glucuronide-(1→3)[β-D-glucoside-(1→6)]-β-D-glucoside              | Flavone- <i>O</i> -glycoside   | F.I |
| S103 | 10.93 | 519.11305 | + | C <sub>24</sub> H <sub>22</sub> O <sub>13</sub> | -0.515 | 343.08023(10),315.08505(69),311.05420(10),301.07013(20),283.05975(29),271.05951(100),231.06464(5),201.09091(7)                                                  | Trihydroxyflavone <i>O</i> -6"-malonyl glucoside (Isomer of Apigenin 7-6"-malonyl glucoside) | Flavone- <i>O</i> -glycoside   | F.I |
| S104 | 9.49  | 433.11257 | + | C <sub>21</sub> H <sub>20</sub> O <sub>10</sub> | -0.816 | 271.05969(100)                                                                                                                                                  | Isomer of Baicalein 7- <i>O</i> -glucoside<br>(Trihydroxyflavone <i>O</i> -glucoside)        | Flavone- <i>O</i> -glycoside   | /   |
| S105 | 5.72  | 523.14417 | + | C <sub>24</sub> H <sub>26</sub> O <sub>13</sub> | -0.855 | 361.09100(100),346.06732(8),331.04391(8),328.05756(3),313.03406(3)                                                                                              | Trihydroxy-trimethoxyflavone- <i>O</i> -glucoside                                            | Flavone- <i>O</i> -glycoside   | /   |
| S106 | 9.38  | 519.1129  | + | C <sub>24</sub> H <sub>22</sub> O <sub>13</sub> | -0.803 | 337.06061(2),297.07465(7),285.07510(10),271.05954(73),255.06462(10),239.06934(1),231.06471(2),215.07065(1),174.55710(1),156.26376(1),105.03371(7),59.06100(100) | Isomer of S103<br>(Trihydroxyflavone <i>O</i> -6"-malonyl glucoside)                         | Flavone- <i>O</i> -glycoside   | F.I |
| S107 | 10.34 | 447.12802 | + | C <sub>22</sub> H <sub>22</sub> O <sub>10</sub> | -1.237 | 285.07468(100),270.05124(15)                                                                                                                                    | Oroxylin A 7- <i>O</i> -glucoside                                                            | Flavanone- <i>O</i> -glycoside | RS  |

|      |       |           |   |                                                 |        |                                                                                                                                                                                                                                                            |                                                                                       |                              |     |
|------|-------|-----------|---|-------------------------------------------------|--------|------------------------------------------------------------------------------------------------------------------------------------------------------------------------------------------------------------------------------------------------------------|---------------------------------------------------------------------------------------|------------------------------|-----|
| S108 | 5.77  | 433.11249 | + | C <sub>21</sub> H <sub>20</sub> O <sub>10</sub> | -1     | 271.05957(100),169.01288(0.1)                                                                                                                                                                                                                              | Isomer of Baicalein 7- <i>O</i> -glucoside<br>(Trihydroxyflavone <i>O</i> -glucoside) | Flavone- <i>O</i> -glycoside | /   |
| S109 | 5.41  | 595.16536 | + | C <sub>27</sub> H <sub>30</sub> O <sub>15</sub> | -0.649 | 271.05954(100),127.03880(1)                                                                                                                                                                                                                                | Isomer of Apigenin 7- <i>O</i> -sophoroside                                           | Flavone- <i>O</i> -glycoside | F.I |
| S110 | 10.63 | 533.12852 | + | C <sub>25</sub> H <sub>24</sub> O <sub>13</sub> | -0.839 | 285.07535(100),270.05191(18),267.06497(0.3),253.04749(0.1),239.06937(0.1)                                                                                                                                                                                  | Dihydroxy-methoxyflavone <i>O</i> -6"-malonyl glucoside                               | Flavone- <i>O</i> -glycoside | F.I |
| S111 | 5.97  | 623.12372 | + | C <sub>27</sub> H <sub>26</sub> O <sub>17</sub> | -0.892 | 285.07532(100),271.05948(68),270.05182(15)                                                                                                                                                                                                                 | Isomer of Clerodendrin                                                                | Flavone- <i>O</i> -glycoside | F.I |
| S112 | 5.36  | 609.18105 | + | C <sub>28</sub> H <sub>32</sub> O <sub>15</sub> | -0.569 | 285.07538(100),271.05981(15),270.05107(6)                                                                                                                                                                                                                  | Isomer of Acacetin 7- <i>O</i> - $\beta$ -sophoroside                                 | Flavone- <i>O</i> -glycoside | F.I |
| S113 | 12.17 | 489.13876 | + | C <sub>24</sub> H <sub>24</sub> O <sub>11</sub> | -0.773 | 285.07523(100),270.05176(18),175.07506(1),165.09137(0.2),105.03358(2)                                                                                                                                                                                      | Dihydroxy-methoxyflavone <i>O</i> -glucuronide ethyl ester                            | Flavone- <i>O</i> -glycoside | /   |
| S114 | 12.57 | 539.09695 | + | C <sub>30</sub> H <sub>18</sub> O <sub>10</sub> | -0.599 | 521.08783(3),503.0761(1),493.09171(4),465.0969(2),449.1020(1),437.04977(100),419.03888(71),401.02802(10),391.04047(5),375.05029(8),363.0499(3),347.0550(2),323.05453(50),297.03854(6),271.05960(58),270.04407(24),269.04407(70),241.04915(62),225.05426(4) | 8,8'-Bibaicalein                                                                      | Flavones                     | /   |

#, F.I, represented as first report of compound in SR.

☞, RS, represented as identification result obtained by comparing the retention time, UV spectra, and MS data with authentic standards.

**Table S4.** Literature reported biological activities of anti-inflammation, inhibiting of lungs and colon related diseases of 114 constituents in SR. (UP, ZQ group was higher than KQ group; DOWN, KQ group was higher than ZQ group)

| ID   | Identification                                                   | Up-Down | anti-inflammatory<br><i>in vitro</i> | anti-colitis<br><i>in vivo</i> | anti-pneumonia<br><i>in vivo</i> | Ref.            |
|------|------------------------------------------------------------------|---------|--------------------------------------|--------------------------------|----------------------------------|-----------------|
| S1   | Acteoside                                                        | UP      | ☑                                    | ☑                              | ☑                                | 1, 2 3, 4       |
| S2   | Leucosceptoside A                                                | DOWN    | ☑                                    | /                              | /                                | 5               |
| S3   | Isomartynoside                                                   | DOWN    | ☑                                    | /                              | /                                | 6               |
| S4   | Martynoside                                                      | DOWN    | ☑                                    | /                              | /                                | 5, 7            |
| S5   | Darendoside A                                                    | DOWN    | ☑                                    | /                              | /                                | 8-11            |
| S17  | Norwogonoside                                                    | UP      | ☑                                    | /                              | /                                | 12              |
| S19  | Chrysin 7- <i>O</i> -glucuronide                                 | UP      | ☑                                    | /                              | /                                | 13              |
| S21  | Oroxylin A 7- <i>O</i> -glucuronide                              | UP      | ☑                                    | /                              | /                                | 14, 15          |
| S22  | Scutellarin                                                      | UP      | ☑                                    | /                              | ☑                                | 16, 17          |
| S23  | Dinatin 7 <i>O</i> -glucoside                                    | UP      | ☑                                    | /                              | /                                | 18              |
| S24  | 5,7,2'-Trihydroxy-8-methoxyflavanone<br>7- <i>O</i> -glucuronide | DOWN    | ☑                                    | /                              | /                                | 19, 20          |
| S25  | Wogonoside                                                       | UP      | ☑                                    | ☑                              | ☑                                | 21-24           |
| S39  | Baicalin                                                         | UP      | ☑                                    | ☑                              | ☑                                | 25-29 27 30     |
| S40  | Chrysin-6- <i>C</i> -arabinoside-8- <i>C</i> -glucoside          | UP      | ☑                                    | /                              | /                                | 12 31           |
| S45  | Chrysin 6,8-di- <i>C</i> - glucoside                             | UP      | ☑                                    | /                              | /                                | 31              |
| S46  | Chrysin-6- <i>C</i> - glucoside-8- <i>C</i> -<br>arabinoside     | UP      | ☑                                    | /                              | /                                | 12              |
| S56  | 5,7,3,2',6'-Pentahydroxyflavanone                                | UP      | ☑                                    | /                              | /                                | 32              |
| S57  | Viscidulin III                                                   | UP      | ☑                                    | /                              | /                                | 33              |
| S58  | Scutellarein                                                     | UP      | ☑                                    | /                              | ☑                                | 34, 35          |
| S59  | Baicalein                                                        | UP      | ☑                                    | ☑                              | ☑                                | 36-42, [419-421 |
| S60  | Wogonin                                                          | UP      | ☑                                    | ☑                              | ☑                                | 43, 44 45-47    |
| S62  | Oroxylin A                                                       | DOWN    | ☑                                    | ☑                              | ☑                                | 48-51           |
| S63  | Skullcapflavone I                                                | DOWN    | ☑                                    | /                              | /                                | 52              |
| S66  | Skullcapflavone II                                               | DOWN    | ☑                                    | /                              | /                                | 33              |
| S67  | Apigenin                                                         | DOWN    | ☑                                    | ☑                              | ☑                                | 53, 54          |
| S71  | Eriodictyol                                                      | DOWN    | ☑                                    | /                              | /                                | 55              |
| S77  | Nepetin                                                          | DOWN    | ☑                                    | /                              | ☑                                | 56, 57          |
| S78  | Chrysin                                                          | DOWN    | ☑                                    | ☑                              | ☑                                | 58              |
| S104 | Apigenin 7- <i>O</i> -glucoside                                  | UP      | ☑                                    | /                              | /                                | 59              |
| S114 | 8,8"-Bibaicalein                                                 | DOWN    | ☑                                    | /                              | /                                | 60              |

**Table S5.** Peak area ratios of different constituents of KQ and ZQ samples

| EIC peak area ratio       | Ratio range | Recognition rate for known samples |                | Prediction accuracy and false negative rate for unknown samples** |                   |                 |                   |
|---------------------------|-------------|------------------------------------|----------------|-------------------------------------------------------------------|-------------------|-----------------|-------------------|
|                           |             | KQ recognition                     | ZQ recognition | KQ prediction                                                     | KQ false negative | ZQ prediction   | ZQ false negative |
|                           |             | rate (%) *                         | rate (%) *     | accuracy (%) **                                                   | rate (%) **       | accuracy (%) ** | rate (%) **       |
| S40/S78#                  | < 1.0       | 75.0                               |                | 95.5                                                              | 24.1              |                 |                   |
|                           | > 1.0       |                                    | 95.7           |                                                                   |                   | 75.9            | 4.5               |
| S78/S46                   | > 1.4       | 75.0                               |                | 91.3                                                              | 25.0              |                 |                   |
|                           | < 1.4       |                                    | 91.3           |                                                                   |                   | 75.0            | 8.7               |
| (S46+S40) /S78            | < 1.6       | 75.0                               |                | 100.0                                                             | 23.3              |                 |                   |
|                           | > 1.6       |                                    | 100.0          |                                                                   |                   | 76.7            | 0.0               |
| S39/S59                   | < 1.1       | 82.1                               |                | 88.5                                                              | 20.0              |                 |                   |
|                           | > 1.1       |                                    | 87.0           |                                                                   |                   | 80.0            | 11.5              |
| S25/S60                   | < 0.9       | 89.3                               |                | 78.1                                                              | 23.8              |                 |                   |
|                           | > 0.9       |                                    | 69.6           |                                                                   |                   | 76.2            | 21.9              |
| S21/S62                   | < 1.6       | 82.1                               |                | 85.2                                                              | 22.7              |                 |                   |
|                           | > 1.6       |                                    | 82.6           |                                                                   |                   | 77.3            | 14.8              |
| (S25+S46+S40) / (S60+S78) | < 1.1       | 82.1                               |                | 85.2                                                              | 20.8              |                 |                   |
|                           | > 1.1       |                                    | 82.6           |                                                                   |                   | 79.2            | 14.8              |
| S13/S67                   | < 0.6       | 71.4                               |                | 71.4                                                              | 34.8              |                 |                   |
|                           | > 0.6       |                                    | 65.2           |                                                                   |                   | 65.2            | 28.6              |
| S59/S28                   | > 5.1       | 89.3                               |                | 89.3                                                              | 13.0              |                 |                   |
|                           | < 5.1       |                                    | 87.0           |                                                                   |                   | 87.0            | 10.7              |
| (S39+S28) /S59            | < 1.4       | 85.7                               |                | 85.7                                                              | 17.4              |                 |                   |
|                           | > 1.4       |                                    | 82.6           |                                                                   |                   | 82.6            | 14.3              |
| (S17+S25) /S60            | < 1.3       | 75.0                               |                | 84.0                                                              | 26.9              |                 |                   |
|                           | > 1.3       |                                    | 82.6           |                                                                   |                   | 73.1            | 16.0              |



|                              |                  |      |      |      |      |      |      |
|------------------------------|------------------|------|------|------|------|------|------|
| <b>S25/S71</b>               | <b>&lt; 6.5</b>  | 92.9 |      | 89.7 | 9.1  |      |      |
|                              | <b>&gt; 6.5</b>  |      | 87.0 |      |      | 90.9 | 10.3 |
| <b>S39/S71</b>               | <b>&lt; 9.0</b>  | 96.4 |      | 96.4 | 4.3  |      |      |
|                              | <b>&gt; 9.0</b>  |      | 95.7 |      |      | 95.7 | 3.6  |
| <b>(S25+S39) / (S60+S71)</b> | <b>&lt; 1.8</b>  | 85.7 |      | 96.0 | 15.4 |      |      |
|                              | <b>&gt; 1.8</b>  |      | 95.7 |      |      | 84.6 | 4.0  |
| <b>S28/S71</b>               | <b>&lt; 2.0</b>  | 96.4 |      | 93.1 | 4.5  |      |      |
|                              | <b>&gt; 2.0</b>  |      | 91.3 |      |      | 95.5 | 6.9  |
| <b>S13/S71</b>               | <b>&lt; 1.0</b>  | 89.3 |      | 89.3 | 13.0 |      |      |
|                              | <b>&gt; 1.0</b>  |      | 87.0 |      |      | 87.0 | 10.7 |
| <b>S27/S71</b>               | <b>&lt; 1.4</b>  | 92.9 |      | 96.3 | 8.3  |      |      |
|                              | <b>&gt; 1.4</b>  |      | 95.7 |      |      | 91.7 | 3.7  |
| <b>S29/S71</b>               | <b>&lt; 1.0</b>  | 89.3 |      | 89.3 | 13.0 |      |      |
|                              | <b>&gt; 1.0</b>  |      | 87.0 |      |      | 87.0 | 10.7 |
| <b>S27/S5</b>                | <b>&lt; 30.0</b> | 85.7 |      | 88.9 | 16.7 |      |      |
|                              | <b>&gt; 30.0</b> |      | 87.0 |      |      | 83.3 | 11.1 |

\*, KQ recognition rate (%)=Identified amount of KQ samples/28 KQ samples; ZQ recognition rate (%)=Identified amount of ZQ samples/23 ZQ samples.

\*\*, KQ prediction accuracy (%)=Actual amount of KQ samples in unknown samples/identified amount of unknown samples; ZQ prediction accuracy (%)=Actual amount of ZQ samples in unknown samples/identified amount of unknown samples; KQ false negative rate (%)=1-ZQ prediction accuracy; ZQ false negative rate (%)=1-KQ prediction accuracy.

**Table S6.** Peak areas of the main active constituents in colon calculated from extracted ion chromatograms in six repeated experiments. Avg1, Avg2, Avg3, Avg4, Avg5, and Avg6 was the average content in G1, G2, G3, G4, G5, and G6 (n=6 in each group).  $KQ_{Avg1-6}$ ,  $ZQ_{Avg1-6}$ ,  $SEM_{KQ}$ ,  $SEM_{ZQ}$  represented mean  $\pm$  SEM in KQ groups (n=36) and ZQ groups (n=36).

| ID   | KQ-G1       | KQ-G2       | KQ-G3       | KQ-G4       | KQ-G5       | KQ-G6       | ZQ-G1       | ZQ-G2       | ZQ-G3       | ZQ-G4       | ZQ-G5       | ZQ-G6       | $KQ_{Avg1-6}$ | $SEM_{KQ}$ | $ZQ_{Avg1-6}$ | $SEM_{ZQ}$ |
|------|-------------|-------------|-------------|-------------|-------------|-------------|-------------|-------------|-------------|-------------|-------------|-------------|---------------|------------|---------------|------------|
|      | $KQ_{Avg1}$ | $KQ_{Avg2}$ | $KQ_{Avg3}$ | $KQ_{Avg4}$ | $KQ_{Avg5}$ | $KQ_{Avg6}$ | $ZQ_{Avg1}$ | $ZQ_{Avg2}$ | $ZQ_{Avg3}$ | $ZQ_{Avg4}$ | $ZQ_{Avg5}$ | $ZQ_{Avg6}$ |               |            |               |            |
| S13# | 1.33E+06    | 1.10E+06    | 3.00E+06    | 5.21E+05    | 2.23E+06    | 2.78E+06    | 9.85E+05    | 6.57E+05    | 3.23E+06    | 1.60E+06    | 3.36E+06    | 3.34E+06    | 1.83E+06      | 3.06E+05   | 2.19E+06      | 2.75E+05   |
| S21  | 3.94E+06    | 4.36E+06    | 1.26E+07    | 1.34E+06    | 8.22E+06    | 6.82E+06    | 1.67E+06    | 1.68E+06    | 1.09E+07    | 5.19E+06    | 1.18E+07    | 1.05E+07    | 6.22E+06      | 1.13E+06   | 6.95E+06      | 1.00E+06   |
| S25  | 1.98E+06    | 4.66E+06    | 1.86E+07    | 4.33E+06    | 8.71E+06    | 1.02E+07    | 5.16E+05    | 1.32E+06    | 1.34E+07    | 9.63E+06    | 1.20E+07    | 1.66E+07    | 8.09E+06      | 1.76E+06   | 8.89E+06      | 8.08E+05   |
| S39  | 8.35E+05    | 4.78E+06    | 1.58E+07    | 3.03E+06    | 9.46E+06    | 9.76E+06    | 5.19E+05    | 2.04E+06    | 1.40E+07    | 7.79E+06    | 1.17E+07    | 1.49E+07    | 7.29E+06      | 1.55E+06   | 8.48E+06      | 2.21E+08   |
| S40  | 1.47E+07    | 1.96E+06    | 6.61E+06    | 2.25E+06    | 5.71E+06    | 6.50E+06    | 1.04E+07    | 2.63E+06    | 1.07E+07    | 5.08E+06    | 7.13E+06    | 4.59E+06    | 6.29E+06      | 1.50E+06   | 6.76E+06      | 1.55E+07   |
| S46  | 7.47E+06    | 9.71E+05    | 4.45E+06    | 1.17E+06    | 3.94E+06    | 4.53E+06    | 7.47E+06    | 1.53E+06    | 8.02E+06    | 4.53E+06    | 4.62E+06    | 3.54E+06    | 3.76E+06      | 8.26E+05   | 4.95E+06      | 4.92E+05   |
| S59  | 1.95E+08    | 8.30E+07    | 4.70E+08    | 1.14E+08    | 4.65E+08    | 7.45E+08    | 1.32E+08    | 8.92E+07    | 8.62E+08    | 5.59E+08    | 8.77E+08    | 1.95E+09    | 3.45E+08      | 6.48E+07   | 7.45E+08      | 7.91E+06   |
| S60  | 1.25E+08    | 2.98E+07    | 1.14E+08    | 3.01E+07    | 1.13E+08    | 1.35E+08    | 4.73E+07    | 1.88E+07    | 1.85E+08    | 9.07E+07    | 1.65E+08    | 1.80E+08    | 9.12E+07      | 1.55E+07   | 1.14E+08      | 9.04E+06   |
| S61  | 1.47E+06    | 8.61E+05    | 2.86E+06    | 3.69E+05    | 5.77E+06    | 8.64E+06    | 1.05E+06    | 4.05E+05    | 4.27E+06    | 3.24E+06    | 6.35E+06    | 5.47E+06    | 3.33E+06      | 7.97E+05   | 3.46E+06      | 2.63E+06   |
| S62  | 5.38E+07    | 9.45E+06    | 5.75E+07    | 6.57E+06    | 5.14E+07    | 4.76E+07    | 1.72E+07    | 6.52E+06    | 9.51E+07    | 2.98E+07    | 1.02E+08    | 7.48E+07    | 3.77E+07      | 6.44E+06   | 5.42E+07      | 1.53E+07   |
| S65  | 1.67E+07    | 4.17E+06    | 2.50E+07    | 5.08E+06    | 2.41E+07    | 3.94E+07    | 7.25E+06    | 4.10E+06    | 5.91E+07    | 2.47E+07    | 3.93E+07    | 1.44E+08    | 1.91E+07      | 3.68E+06   | 4.64E+07      | 1.60E+06   |
| S66  | 7.47E+06    | 2.77E+06    | 2.57E+07    | 5.23E+06    | 1.26E+07    | 4.56E+07    | 4.72E+06    | 2.98E+06    | 3.84E+07    | 1.65E+07    | 2.06E+07    | 2.24E+07    | 1.66E+07      | 3.40E+06   | 1.76E+07      | 1.01E+06   |
| S67  | 5.09E+07    | 2.00E+07    | 9.81E+07    | 3.15E+07    | 9.19E+07    | 1.47E+08    | 3.96E+07    | 2.89E+07    | 2.42E+08    | 9.37E+07    | 1.55E+08    | 1.33E+08    | 7.32E+07      | 1.22E+07   | 1.15E+08      | 1.38E+06   |
| M2   | 2.90E+06    | 2.05E+06    | 1.07E+07    | 1.76E+05    | 7.52E+06    | 7.37E+06    | 4.67E+06    | 1.96E+06    | 1.26E+07    | 4.56E+06    | 1.04E+07    | 9.36E+06    | 5.11E+06      | 1.04E+06   | 7.24E+06      | 1.09E+06   |
| M3   | 1.92E+07    | 4.05E+06    | 2.03E+07    | 2.43E+06    | 1.00E+07    | 1.54E+07    | 1.73E+07    | 1.51E+07    | 1.73E+07    | 9.69E+06    | 1.89E+07    | 1.88E+07    | 1.19E+07      | 1.76E+06   | 1.62E+07      | 2.18E+06   |
| M9   | 1.76E+06    | 3.69E+05    | 6.87E+06    | 4.97E+05    | 8.55E+06    | 4.97E+06    | 1.78E+06    | 1.04E+06    | 1.66E+07    | 5.12E+06    | 1.37E+07    | 6.90E+06    | 3.84E+06      | 9.47E+05   | 7.53E+06      | 1.32E+06   |
| M10  | 3.21E+06    | 7.11E+05    | 2.12E+06    | 1.47E+05    | 2.87E+06    | 7.46E+06    | 9.61E+05    | 5.82E+05    | 4.53E+06    | 1.72E+06    | 4.62E+06    | 3.88E+06    | 2.75E+06      | 6.17E+05   | 2.72E+06      | 4.04E+05   |
| M12  | 1.68E+07    | 6.89E+05    | 3.33E+06    | 1.20E+06    | 6.74E+06    | 1.27E+06    | 5.61E+06    | 9.64E+05    | 1.27E+07    | 2.57E+06    | 1.01E+07    | 1.06E+06    | 5.00E+06      | 1.52E+06   | 5.50E+06      | 1.04E+06   |
| M14  | 1.53E+06    | 1.77E+05    | 7.76E+05    | 1.47E+05    | 6.17E+05    | 6.19E+05    | 1.58E+06    | 1.52E+05    | 1.86E+06    | 5.27E+05    | 1.20E+06    | 4.97E+05    | 6.45E+05      | 1.64E+05   | 9.70E+05      | 2.15E+05   |

**Table S7.** Peak areas of the main active constituents in lungs calculated from extracted ion chromatograms in six repeated experiments. Avg1, Avg2, Avg3, Avg4, Avg5, and Avg6 was the average content in G1, G2, G3, G4, G5, and G6 (n=6 in each group).  $KQ_{Avg1\sim6}/ZQ_{Avg1\sim6}$  and  $SEM_{KQ}/SEM_{ZQ}$  represented mean  $\pm$  SEM in KQ groups (n=36) and ZQ groups (n=36).

| ID                     | KQ-G1       | KQ-G2       | KQ-G3       | KQ-G4       | KQ-G5       | KQ-G6       | ZQ-G1       | ZQ-G2       | ZQ-G3       | ZQ-G4       | ZQ-G5       | ZQ-G6       | $KQ_{Avg1-6}$ | $SEM_{KQ}$ | $ZQ_{Avg1-6}$ | $SEM_{ZQ}$ |
|------------------------|-------------|-------------|-------------|-------------|-------------|-------------|-------------|-------------|-------------|-------------|-------------|-------------|---------------|------------|---------------|------------|
|                        | $KQ_{Avg1}$ | $KQ_{Avg2}$ | $KQ_{Avg3}$ | $KQ_{Avg4}$ | $KQ_{Avg5}$ | $KQ_{Avg6}$ | $ZQ_{Avg1}$ | $ZQ_{Avg2}$ | $ZQ_{Avg3}$ | $ZQ_{Avg4}$ | $ZQ_{Avg5}$ | $ZQ_{Avg6}$ |               |            |               |            |
| <b>S13<sup>#</sup></b> | 1.65E+06    | 1.31E+06    | 1.16E+06    | 2.95E+05    | 1.00E+06    | 1.21E+06    | 9.18E+05    | 7.78E+05    | 1.51E+06    | 7.33E+05    | 1.27E+06    | 1.34E+06    | 1.10E+06      | 1.05E+05   | 1.09E+06      | 2.88E+05   |
| <b>S21</b>             | 2.30E+06    | 1.47E+06    | 1.16E+06    | 2.58E+05    | 1.19E+06    | 1.71E+06    | 7.12E+05    | 6.67E+05    | 1.39E+06    | 7.84E+05    | 4.29E+06    | 8.49E+05    | 1.35E+06      | 1.60E+05   | 1.45E+06      | 1.08E+05   |
| <b>S25</b>             | 2.76E+06    | 2.18E+06    | 2.05E+06    | 6.91E+05    | 1.71E+06    | 3.06E+06    | 8.02E+05    | 8.86E+05    | 2.45E+06    | 1.37E+06    | 4.07E+06    | 1.48E+06    | 2.08E+06      | 2.10E+05   | 1.84E+06      | 2.46E+05   |
| <b>S39</b>             | 2.50E+06    | 1.20E+06    | 1.09E+06    | 8.94E+04    | 9.26E+05    | 8.50E+05    | 1.42E+06    | 5.10E+05    | 1.16E+06    | 3.78E+05    | 1.49E+06    | 9.05E+05    | 1.11E+06      | 1.55E+05   | 9.78E+05      | 1.00E+05   |
| <b>S59</b>             | 1.71E+06    | 1.68E+06    | 1.21E+06    | 3.77E+05    | 1.62E+06    | 1.64E+06    | 9.51E+05    | 1.89E+06    | 1.14E+06    | 4.41E+05    | 3.20E+06    | 6.26E+06    | 1.37E+06      | 2.01E+05   | 2.31E+06      | 6.35E+05   |
| <b>S60</b>             | 1.05E+07    | 1.57E+06    | 9.08E+05    | 3.10E+05    | 1.47E+06    | 2.14E+06    | 3.35E+06    | 1.43E+06    | 1.22E+06    | 4.84E+05    | 2.86E+06    | 1.92E+06    | 2.82E+06      | 6.95E+05   | 1.88E+06      | 2.64E+05   |
| <b>S62</b>             | 2.63E+06    | 5.35E+05    | 3.96E+05    | 8.07E+04    | 6.04E+05    | 7.66E+05    | 1.21E+06    | 6.54E+05    | 4.53E+05    | 1.36E+05    | 1.53E+06    | 6.59E+05    | 8.35E+05      | 1.73E+05   | 7.74E+05      | 1.35E+05   |
| <b>S67</b>             | 4.85E+05    | 1.75E+05    | 5.05E+04    | 1.26E+05    | 1.82E+05    | 8.40E+05    | 2.93E+05    | 3.98E+05    | 1.61E+05    | 1.02E+05    | 5.57E+05    | 1.14E+06    | 3.10E+05      | 7.48E+04   | 4.41E+05      | 1.47E+05   |
| <b>S78</b>             | 2.41E+06    | 5.66E+05    | 6.76E+05    | 2.44E+05    | 1.16E+06    | 9.80E+05    | 1.27E+06    | 5.87E+05    | 1.40E+06    | 4.81E+05    | 1.57E+06    | 1.40E+06    | 1.01E+06      | 1.52E+05   | 1.12E+06      | 1.58E+05   |
| <b>M1</b>              | 4.14E+06    | 1.12E+06    | 5.77E+05    | 2.21E+05    | 6.82E+05    | 1.48E+06    | 9.64E+05    | 5.80E+05    | 2.44E+06    | 1.28E+06    | 2.14E+06    | 7.90E+05    | 1.37E+06      | 2.82E+05   | 1.37E+06      | 2.48E+05   |
| <b>M2</b>              | 3.18E+06    | 9.73E+05    | 9.58E+05    | 2.24E+05    | 8.12E+05    | 1.48E+06    | 1.19E+06    | 6.95E+05    | 1.28E+06    | 5.57E+05    | 4.77E+06    | 1.21E+06    | 1.27E+06      | 1.96E+05   | 1.62E+06      | 3.41E+05   |
| <b>M3</b>              | 3.75E+06    | 5.76E+05    | 7.95E+05    | 3.74E+05    | 5.86E+05    | 2.36E+06    | 1.08E+06    | 4.69E+05    | 1.59E+06    | 6.18E+05    | 4.79E+06    | 1.04E+06    | 1.41E+06      | 2.98E+05   | 1.60E+06      | 3.39E+05   |
| <b>M4</b>              | 8.08E+07    | 2.10E+07    | 1.49E+07    | 7.36E+06    | 1.67E+07    | 3.27E+07    | 1.36E+07    | 1.50E+07    | 3.13E+07    | 1.78E+07    | 6.90E+07    | 1.35E+07    | 2.89E+07      | 5.30E+06   | 2.67E+07      | 4.35E+06   |

Part B: MS<sup>2</sup> and proposed fragmentation pathways of constituents in SR, colon and lungs tissues

S2

Leucosceptoside A (t<sub>R</sub>=5.63 min)<sup>61</sup>

MS<sup>1</sup>(-):

637.2141

MS<sup>2</sup>(-):

461.16754(9),315.11038(5),193.05070(18),175.04005(100),160.01636(22),153.05603(10),135.04518(17),113.02439(27)

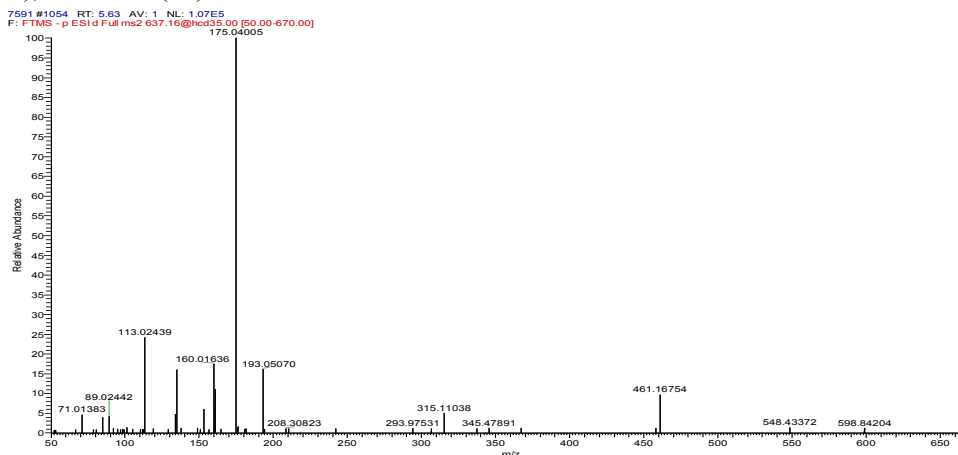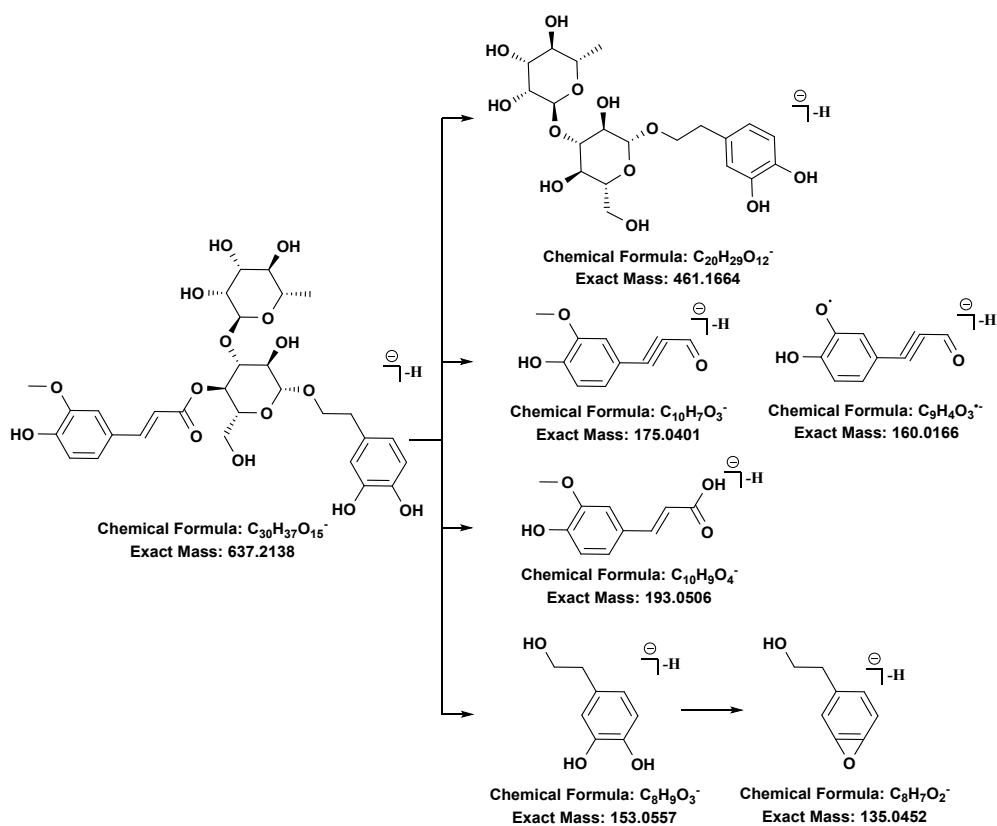

## S3, and S4

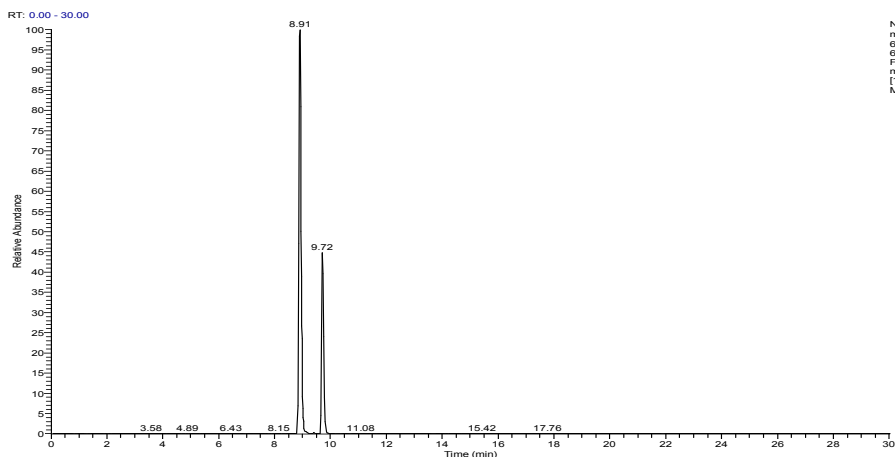

### S3 Isomartynoside ( $t_R=9.74$ min)<sup>62</sup>

MS<sup>1</sup>(-):651.23014

MS<sup>2</sup>(-):636.66242(0.7),193.05060(24),175.03962(100),160.01694(20),149.06090(5),134.03725(5),  
 113.02420(18)

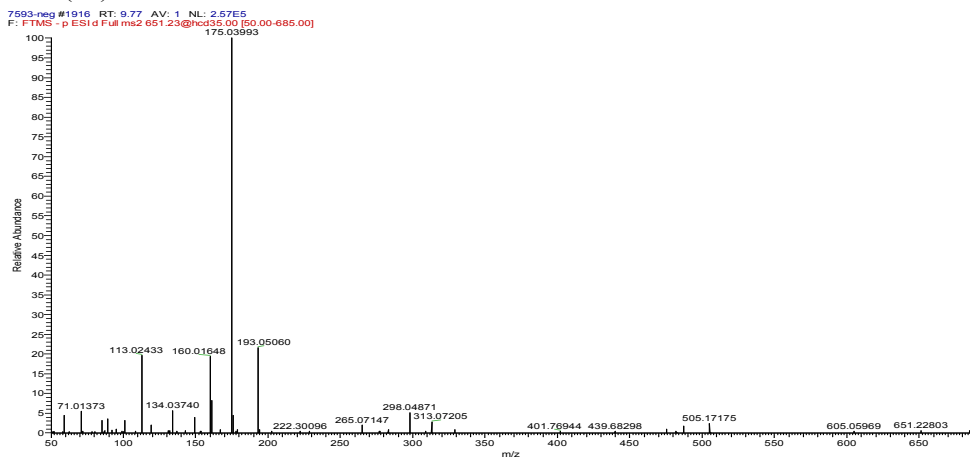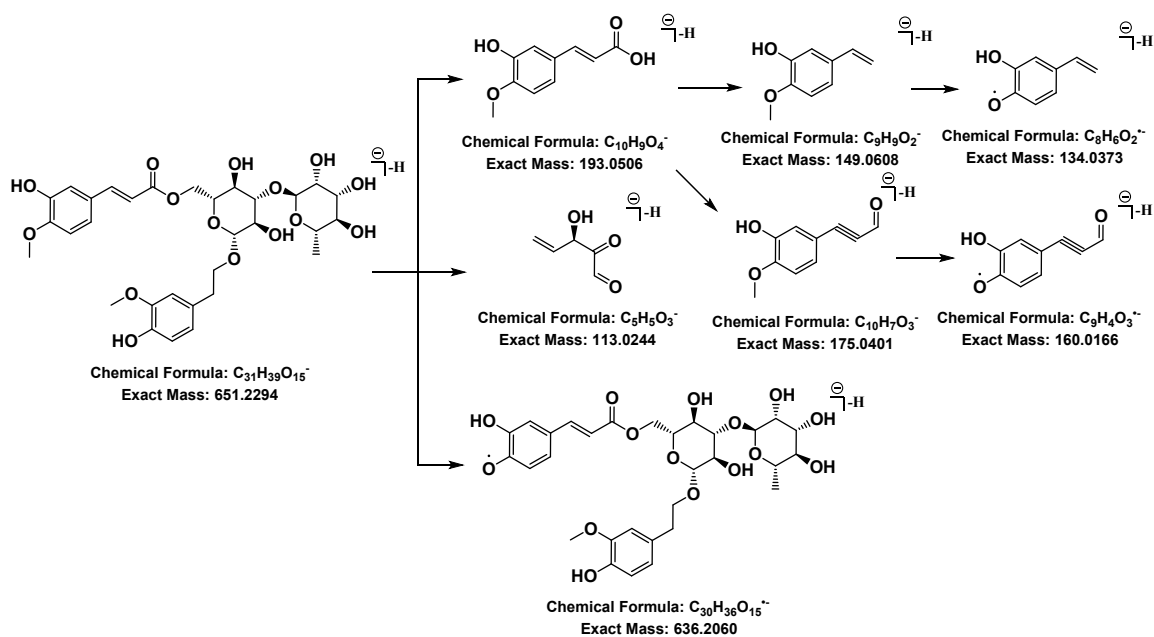

**S4 Martynoside (t<sub>R</sub>=8.91 min)<sup>62</sup>**

MS<sup>1</sup>(-):

651.23018

MS<sup>2</sup>(-):

329.12497(1),299.05658(1),193.05080(13),175.04013(100),167.07126(3),160.01660(28),149.060

87(3),134.03743(8),119.03503(2),113.02441(15),101.02448(2)

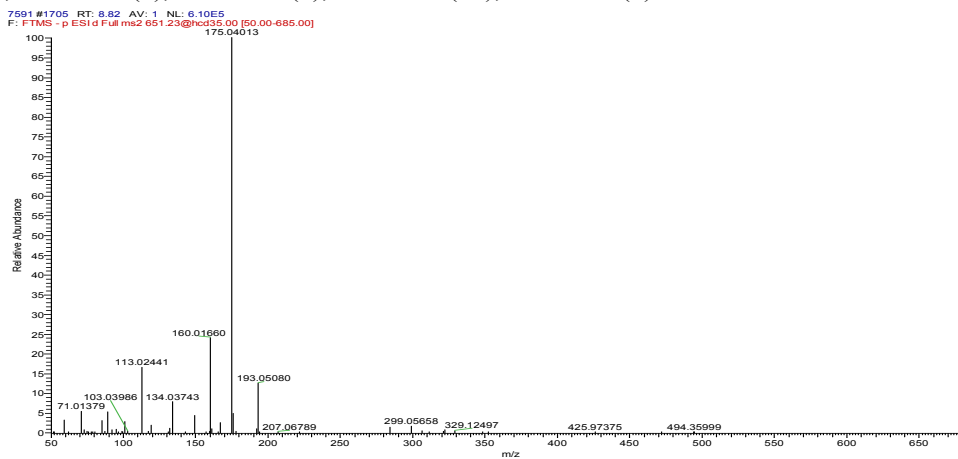

**Darendoside A<sup>62</sup>**MS<sup>1</sup>(-):

475.18188

MS<sup>2</sup>(-):

329.12436(2),311.11435(1),167.07141(2),149.06070(4),134.03731(4),113.02430(100),101.02428(17),95.01369(9)

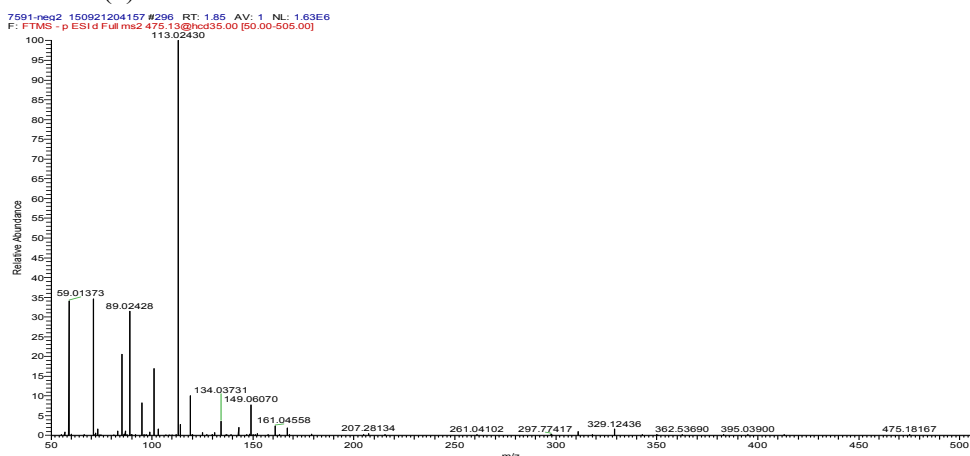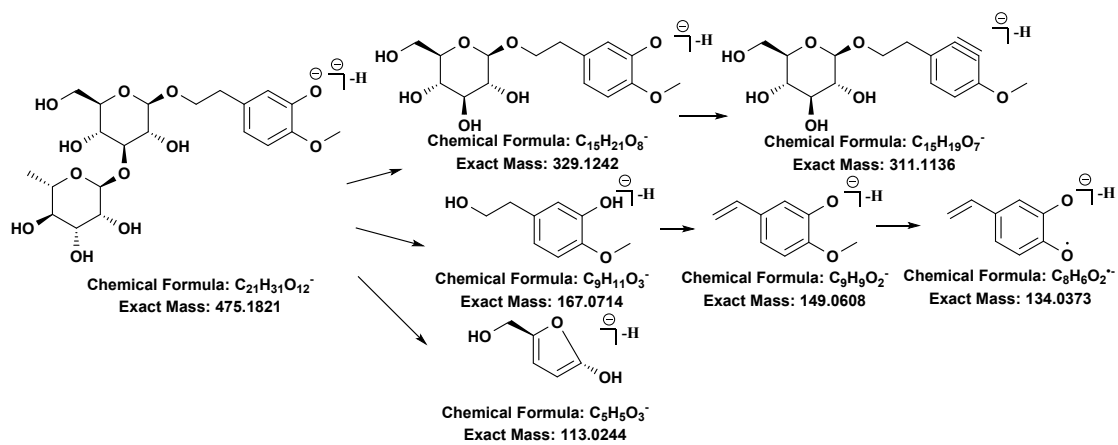

## S6, S21, and S25

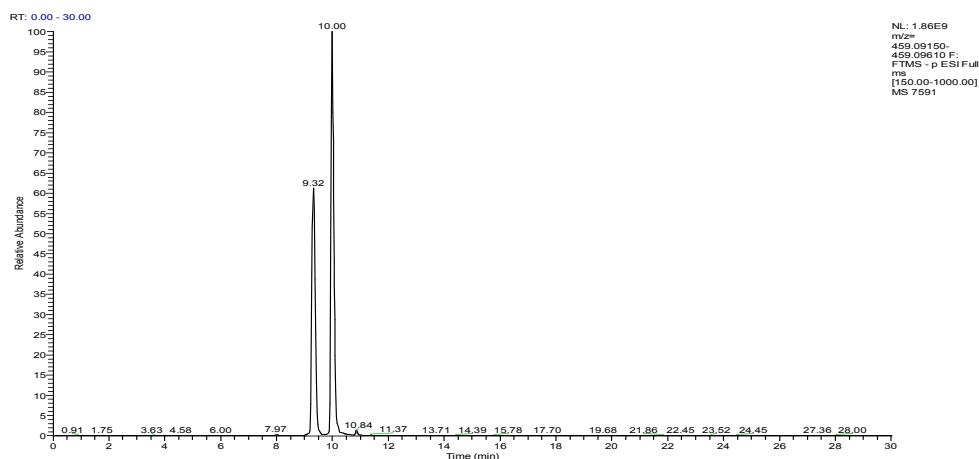

### S6 Isomer of S21 ( $t_R=10.31$ min)

MS<sup>1</sup>(-):

459.0938

MS<sup>2</sup>(-):

283.06140(36), 268.03796(100), 113.02448(12), 99.01(7), 99.0882.01(5), 85.02940(13)

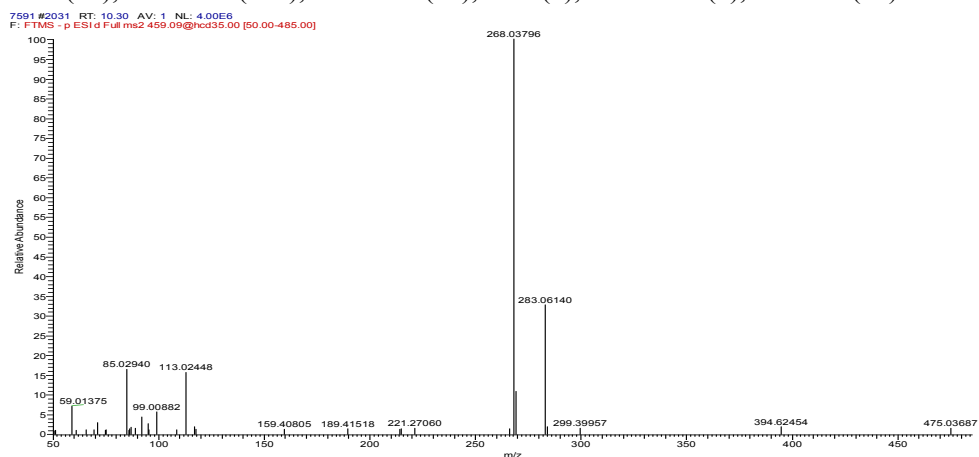



**S21 Oroxylin A 7-glucuronide ( $t_R=9.32$  min)**

MS<sup>1</sup>(-):

459.09374

MS<sup>2</sup>(-):

283.06149(47),268.03806(100),239.07167(0.3),211.03976(0.1),175.02492(1.0),139.00372(0.4),12  
9.01933(2),117.01934(3),113.02438(17),99.00875(7),85.02939(23),71.01373(7)

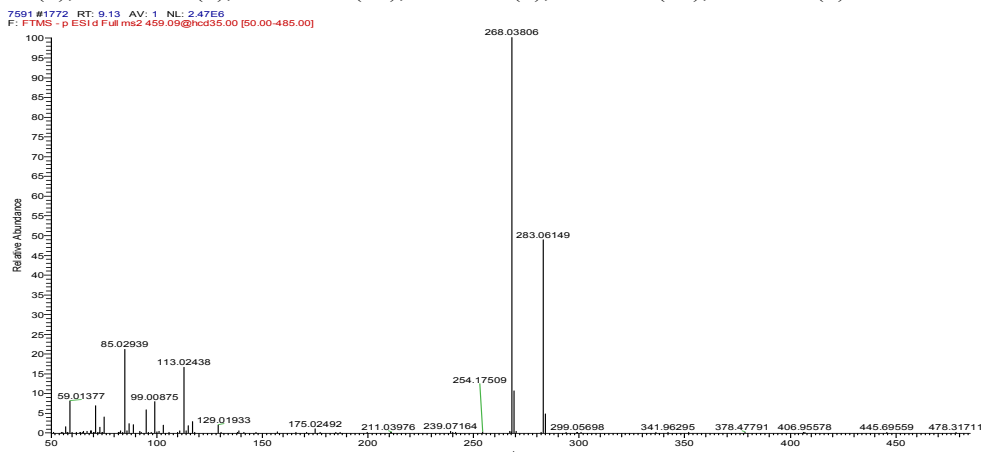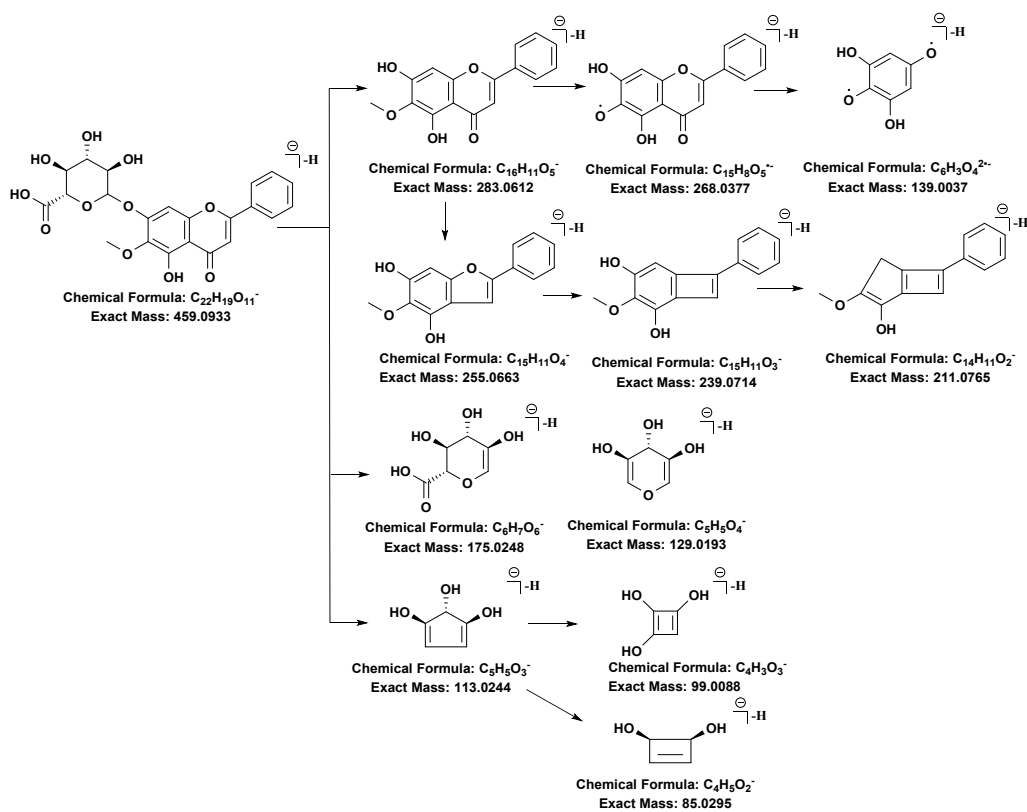

**S25 Wogonoside ( $t_R=10.00$  min)**

MS<sup>1</sup>(-):

459.09363

MS<sup>2</sup>(-):

283.06149(75),268.03806(100),239.07164(0.3),175.02492(1),139.00372(0.4),129.01933(2),113.02438(24),99.00875(12),85.02939(22),71.01373(7)

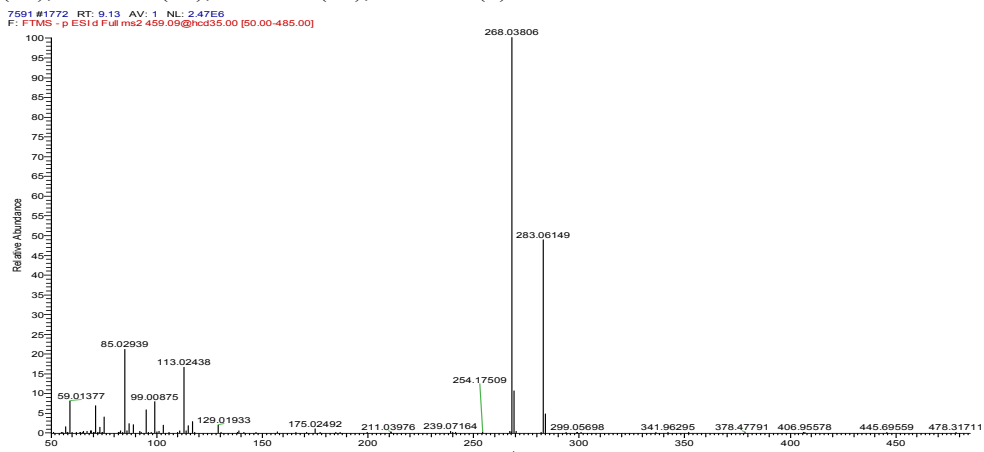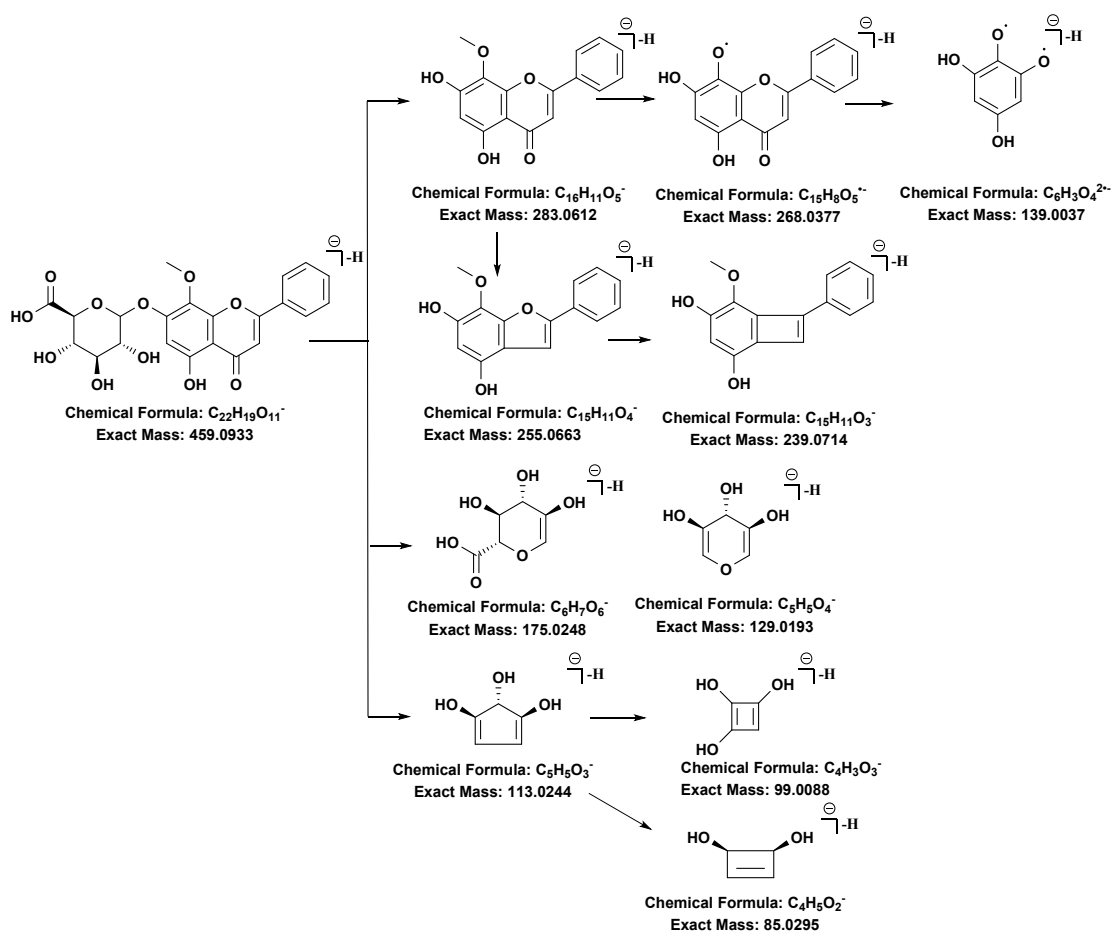

## S7, S13, S17, S20, S29, and S39

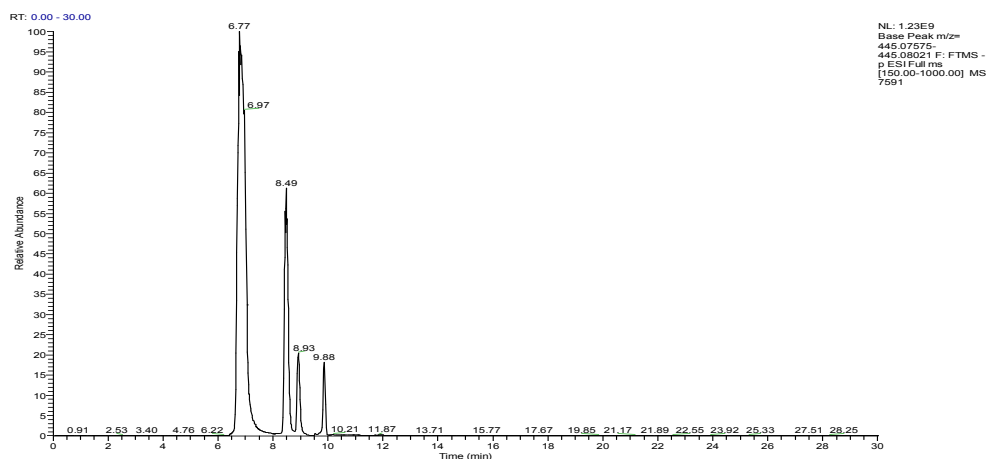

### S7 Isomer of S39 ( $t_R=7.25$ min)

$MS^1(-)$ :445.07798

$MS^2(-)$ :269.04590(100)

### S13 Baicalein 6-*O*-glucuronide ( $t_R=9.88$ min)<sup>61</sup>

$MS^1(-)$ :

445.07796

$MS^2(-)$ :

269.04587(100),251.03519(0.3),241.05064(0.1),225.05563(0.1),223.04022(0.3),113.02444(4),99.00870(2),85.02940(4)

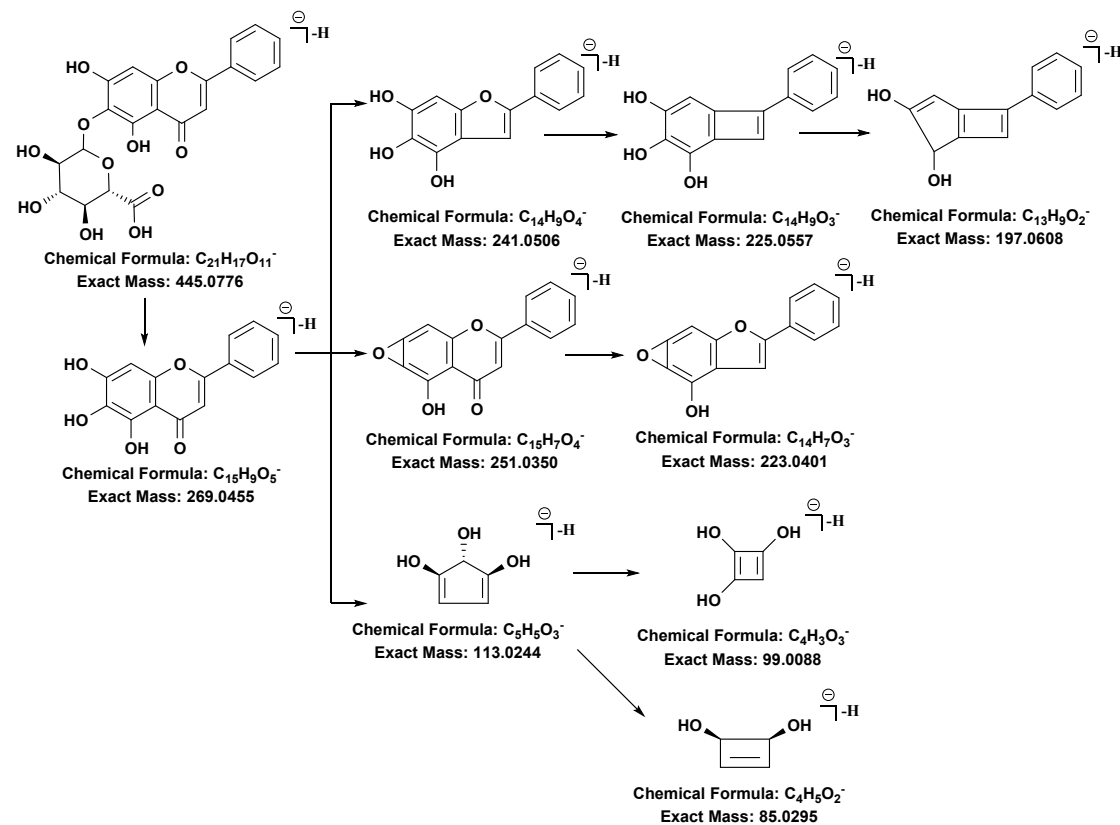

### S17 Norwogonin 7-*O*-glucuronide(norwogonoside) ( $t_R=8.49$ min)<sup>61</sup>

MS<sup>1</sup>(-):

445.07793

MS<sup>2</sup>(-):

269.04596(100),251.03575(0.1),241.05104(0.6),225.05591(2),197.06102(2),113.02441(4),99.00877(2),85.02941(4)

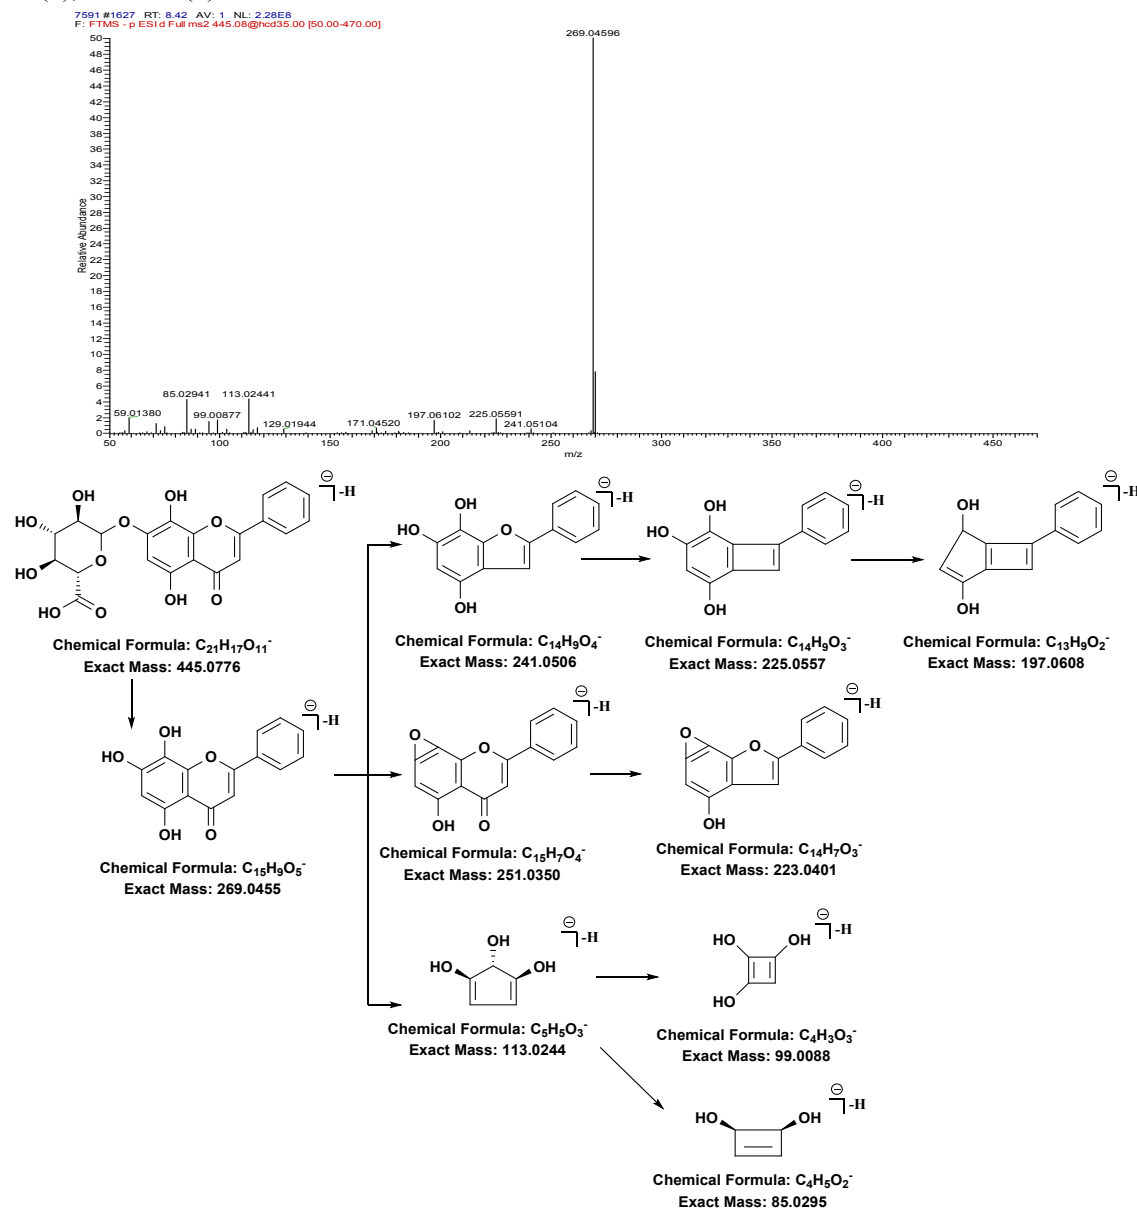

**S20 Isomer of S39 ( $t_R$  7.70)**

MS<sup>1</sup>(-): 445.07795

MS<sup>2</sup>(-): 269.04611(100)

**S29 Norwogonin 8-*O*-glucuronide ( $t_R=8.93$  min)<sup>61</sup>**

MS<sup>1</sup>(-):

445.07795

MS<sup>2</sup>(-):

269.04596(100),268.03815(3),267.03036(1),241.05142(0.5),225.05623(1),197.06119(1),113.02449(3),99.00886(1),85.02956(3),71.01391(2)

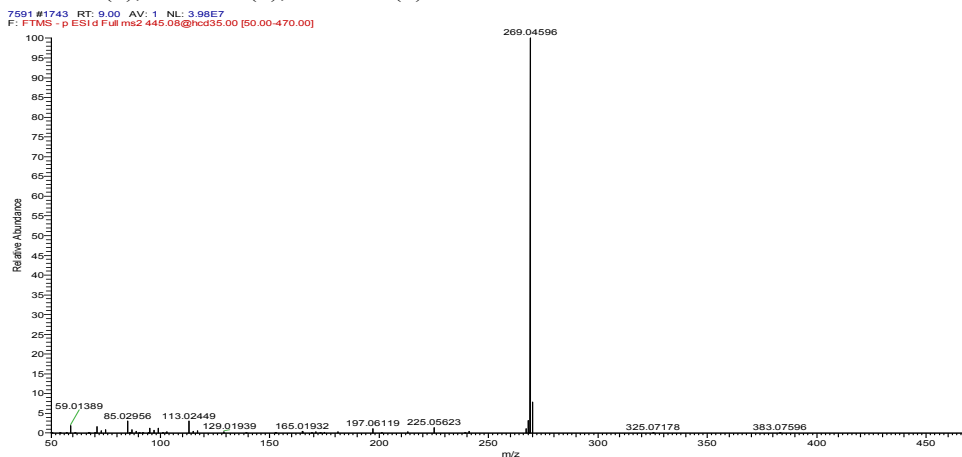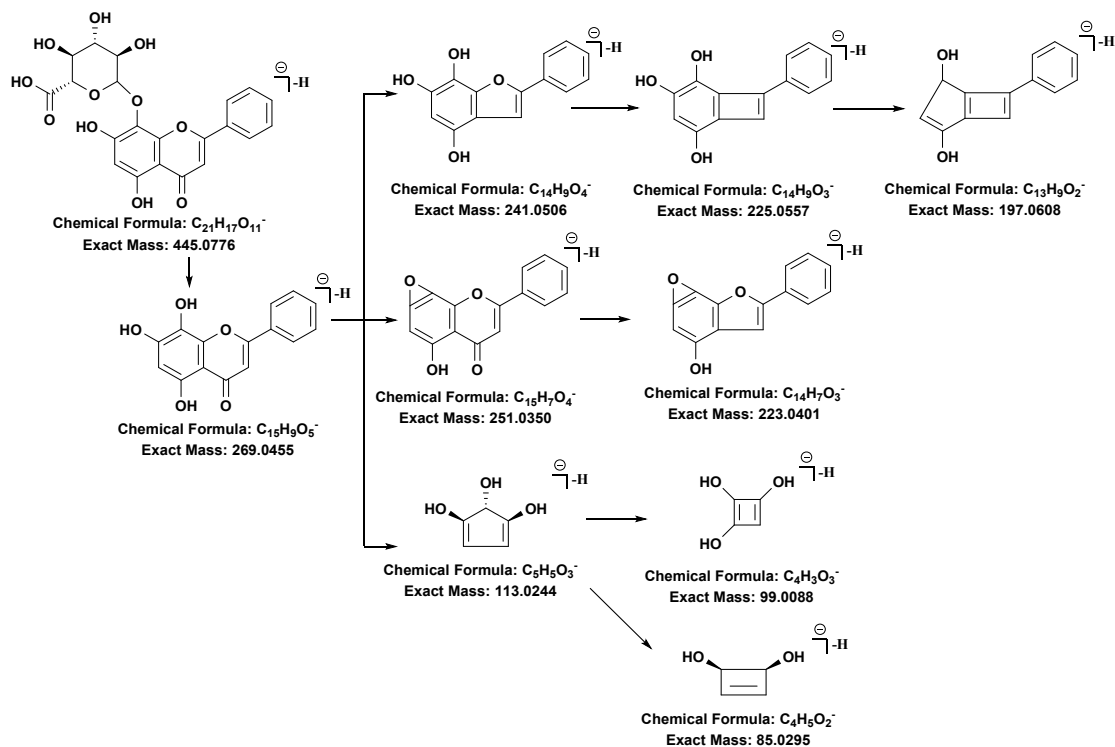

**S39 Baicalin ( $t_R=6.77$  min)**

MS<sup>1</sup>(-):

445.07991

MS<sup>2</sup>(-):

269.04605(100),251.03560(1),241.05084(1),225.05608(0.4),197.06128(0.5),129.01952(1),117.01965(1),113.02452(6),99.00889(3),85.02959(7)

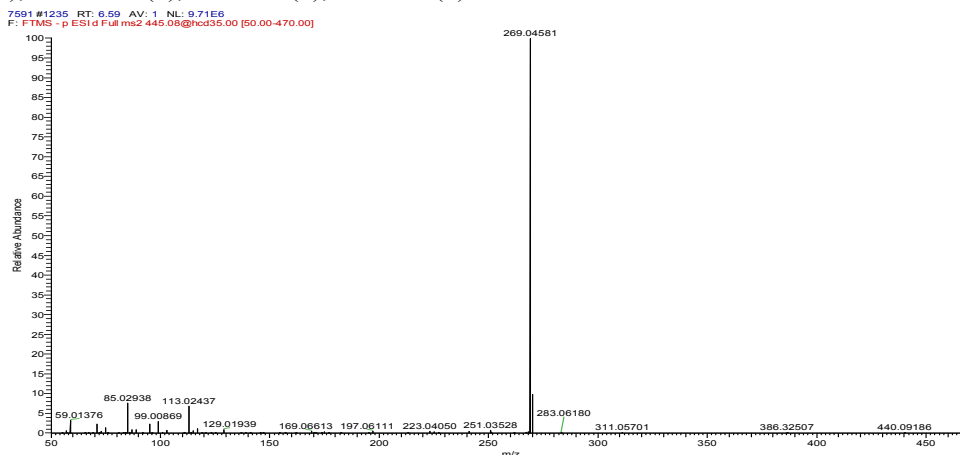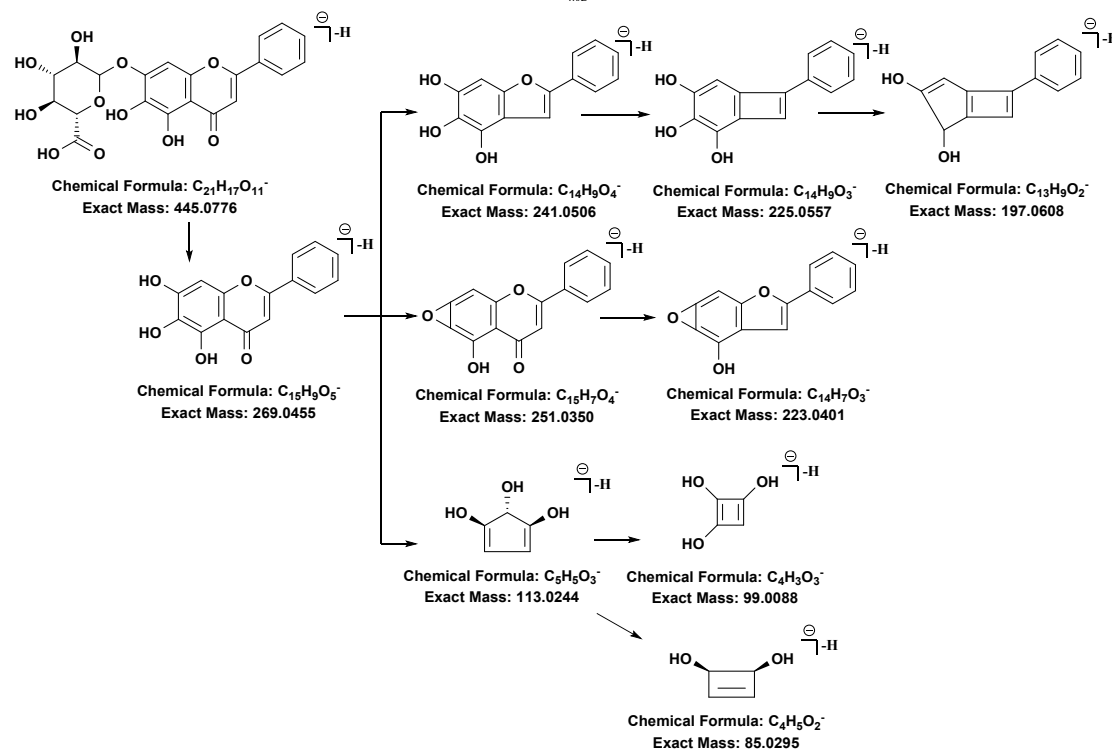

6''-O-acetyl homoplantaginin OR Ladanetin-6-O-β-(6''-O-acetyl)glucoside ( $t_R=10.39$  min)<sup>63</sup>MS<sup>1</sup>(-):

503.12007

MS<sup>2</sup>(-):

459.13107(3),428.07468(4),299.05685(61),284.03314(100),255.06674(33),211.04065(4),151.003

86(3)

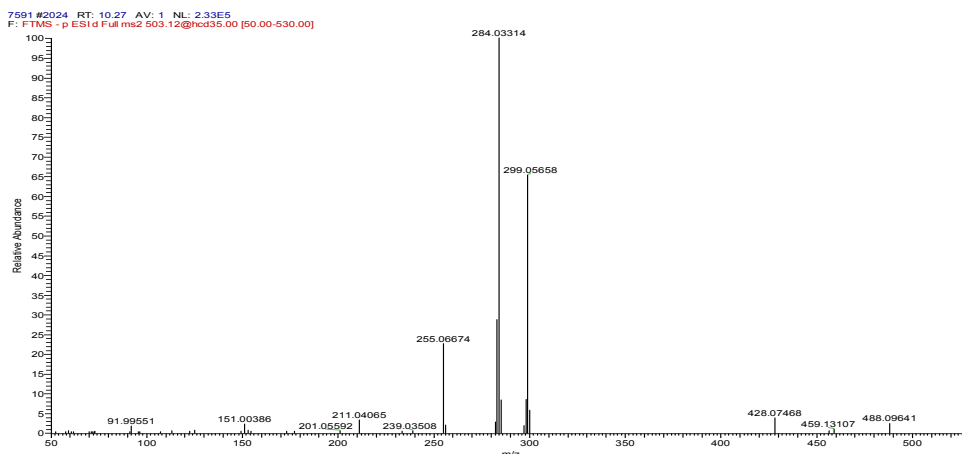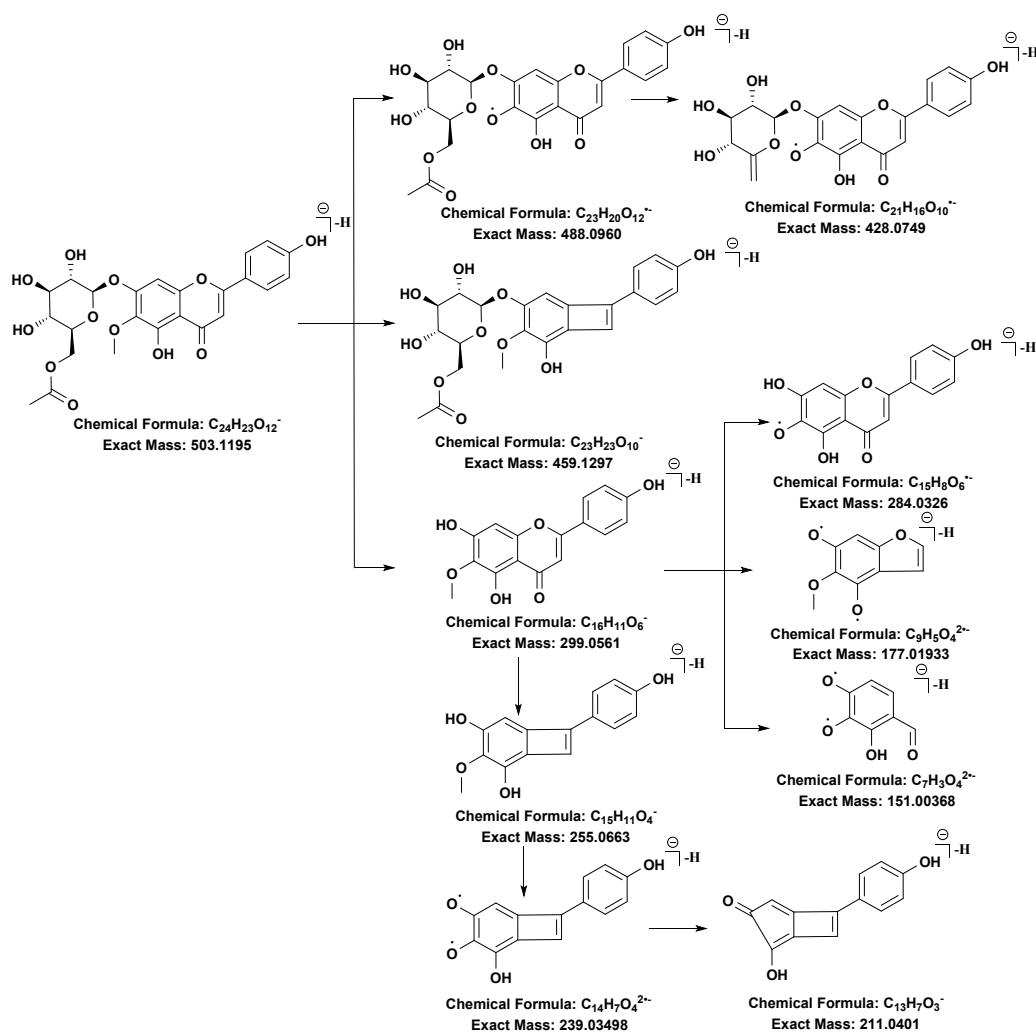

**Isomer of Solanoflavone ( $t_R=7.81$  min)<sup>64</sup>**MS<sup>1</sup>(-):

907.19435

MS<sup>2</sup>(-):

676.36243(4),547.01318(4),388.12686(4),345.12686(4),299.05661(100),284.03271(9),269.04614(12),256.09375(4),267.03131(10)

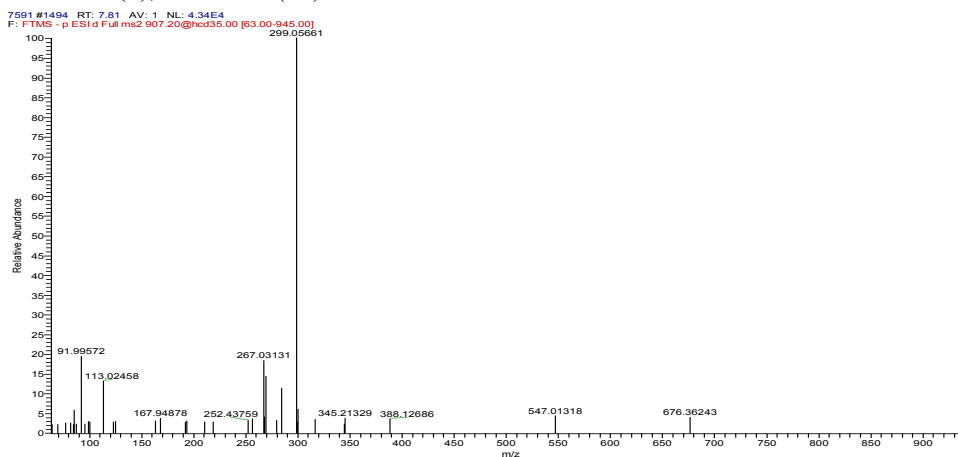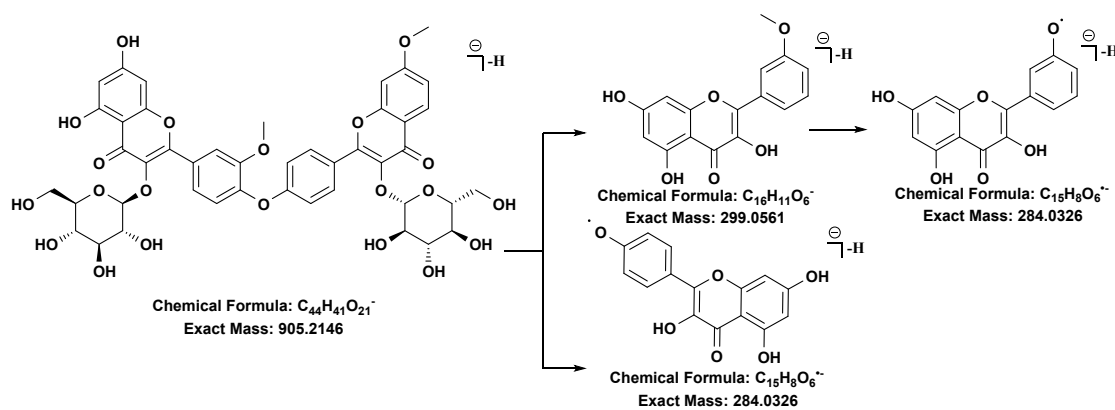



## S10

5,7,4',5'',3''',4''''-hexahydroxy-3''-O-β-glucosyl-3',7''-O-biflavone OR isomer ( $t_R=6.62$  min)<sup>65</sup>

MS<sup>1</sup>(-):

731.12622

MS<sup>2</sup>(-):

285.04032(0.6),269.04575(100),267.02943(0.4),251.22560(2),113.02448(8).

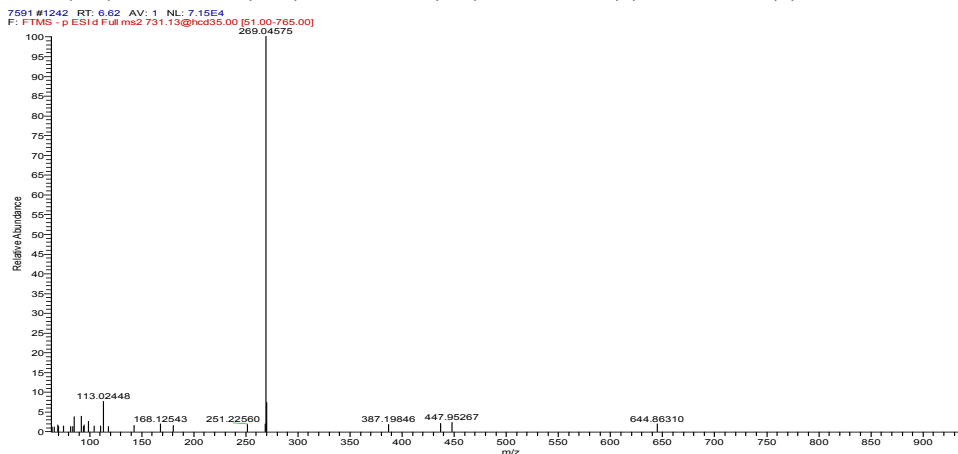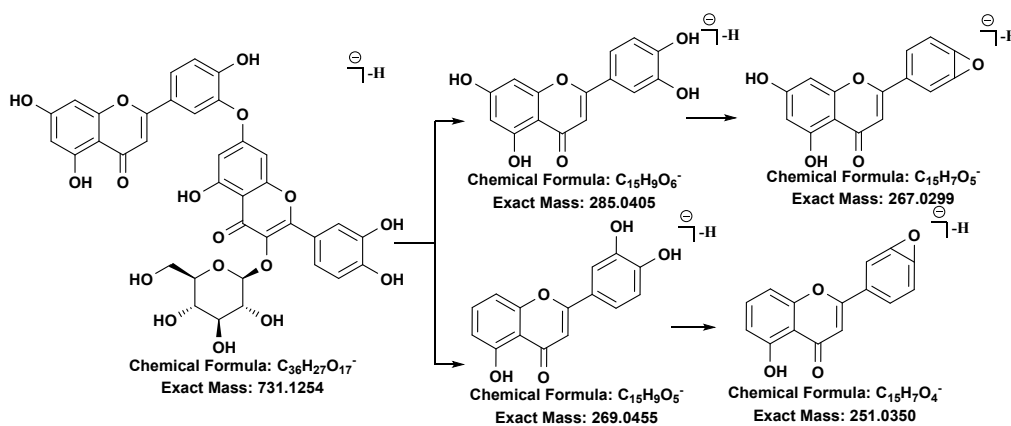

# S11

**Trihydroxy-dimethoxyflavone *O*-glucoside ( $t_R=7.51$  min)<sup>61</sup>**

MS<sup>1</sup>(-):

491.11986

MS<sup>2</sup>(-):

329.06747(42),314.04388(100),299.02063(18),269.04602(2)

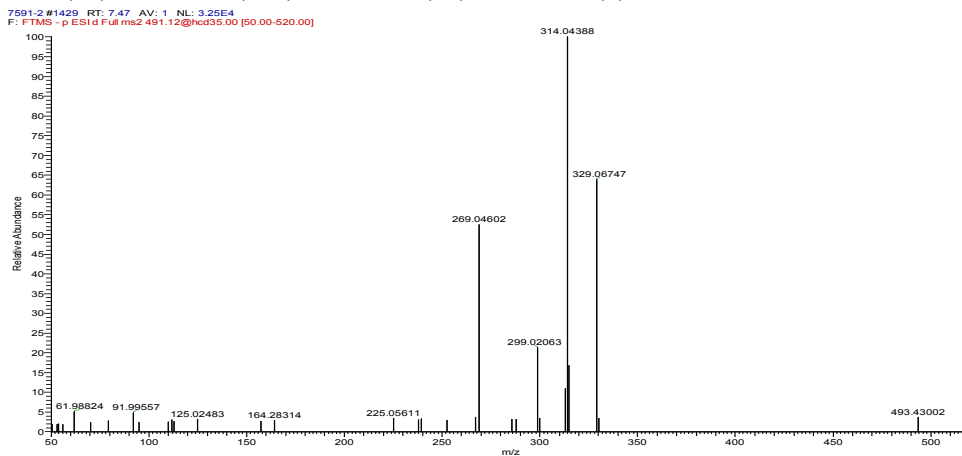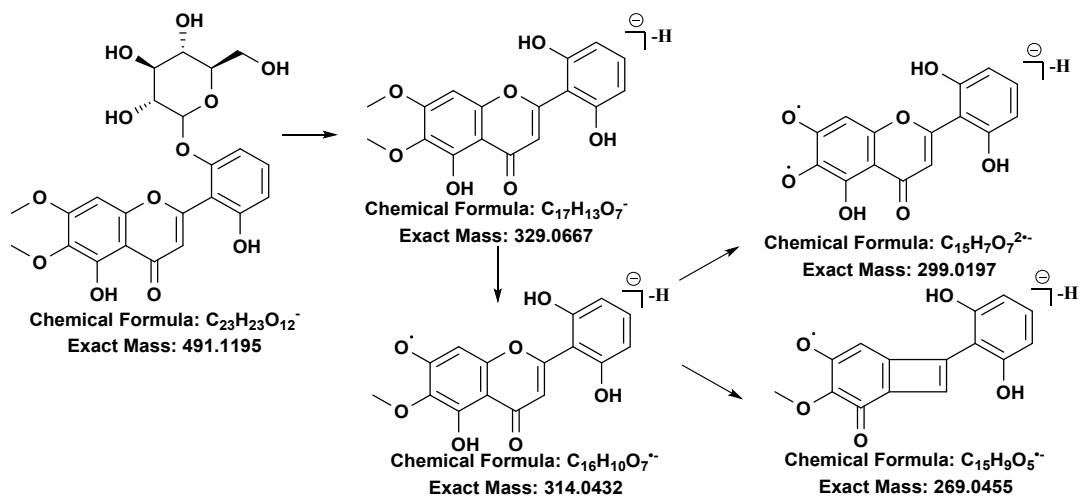

## S12, and S32

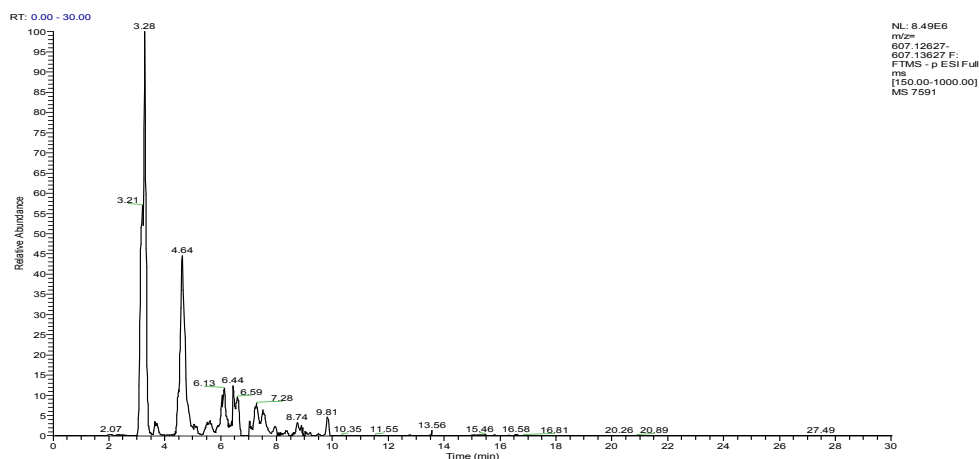

S12 Trihydroxyflavone *O*-glucoside-(1→2)-*O*-glucuronide ( $t_R=4.56$  min)<sup>66</sup>

MS<sup>1</sup>(-):

607.13127

MS<sup>2</sup>(-):

431.09888(3), 269.04596(100), 251.03477(0.4), 175.02(1), 113.02452(5), 95.01376(1), 85.02924(3)

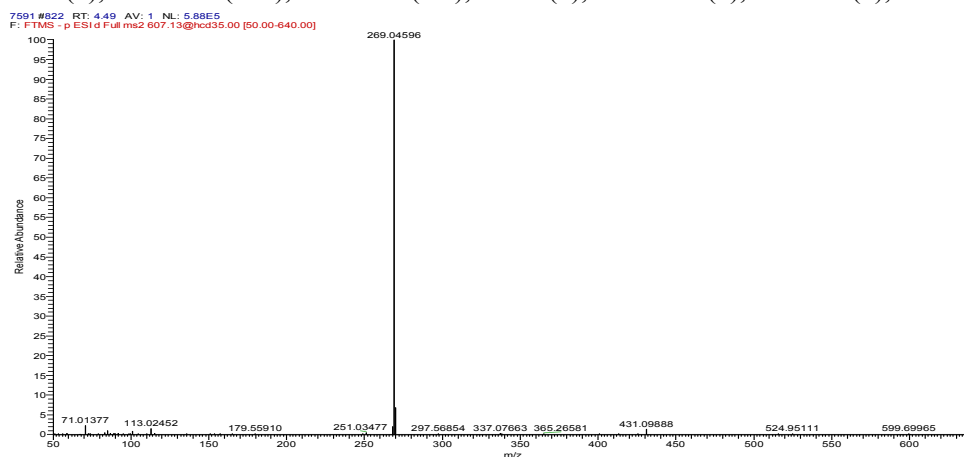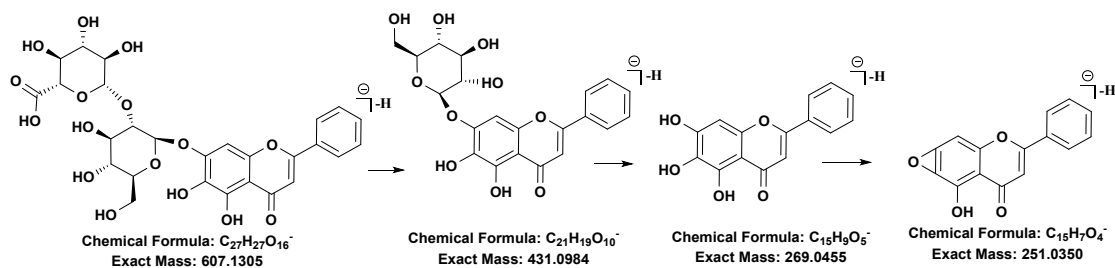

## S14

Isomer of chrysoeriol-7-O-[2''-O-E-feruloyl]- $\beta$ -D-glucoside ( $t_R=10.39$  min)

MS<sup>1</sup>(-):

637.15677

MS<sup>2</sup>(-):

283.06235(0.5),269.04596(100),251.03542(0.3),230.95995(1),223.06(1),205.05(2)

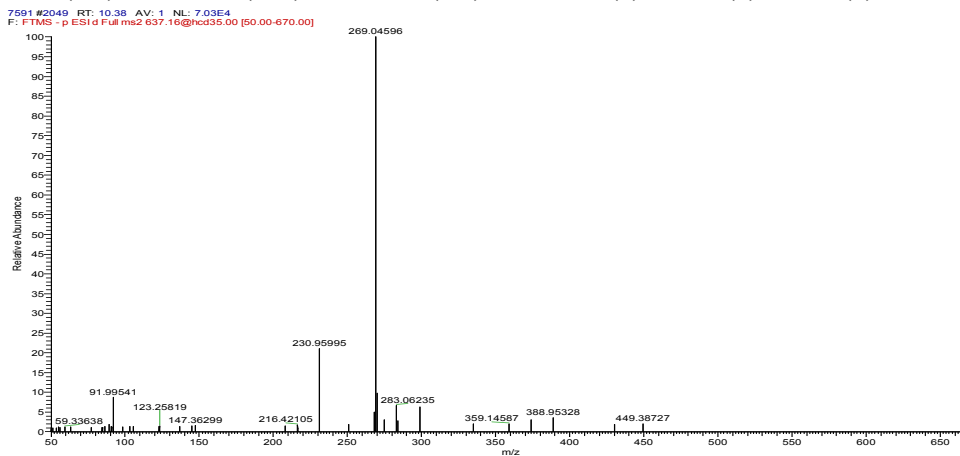

## S15

Unknown ( $t_R=8.17$  min)

MS<sup>1</sup>(-): 863.20450

MS<sup>2</sup>(-): 271.06174(50),269.04608(100),211.07(2),165.62(0.4),113.02454(5)

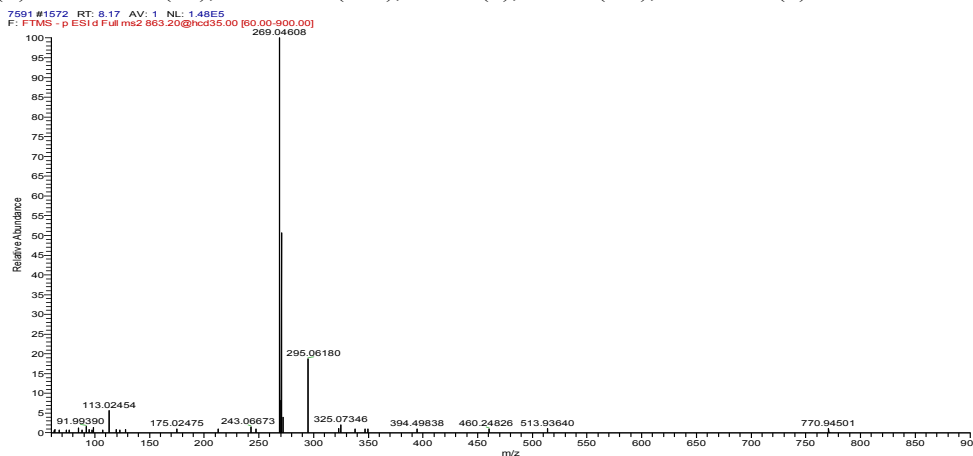

## S16

**Baicalein 7-*O*-ethylglucuronide OR isomer ( $t_R=9.32$  min)<sup>67, 68</sup>**

MS<sup>1</sup>(-):

473.10911

MS<sup>2</sup>(-):

283.06165(33),269.04611(100),268.03824(45),161.00911(6)

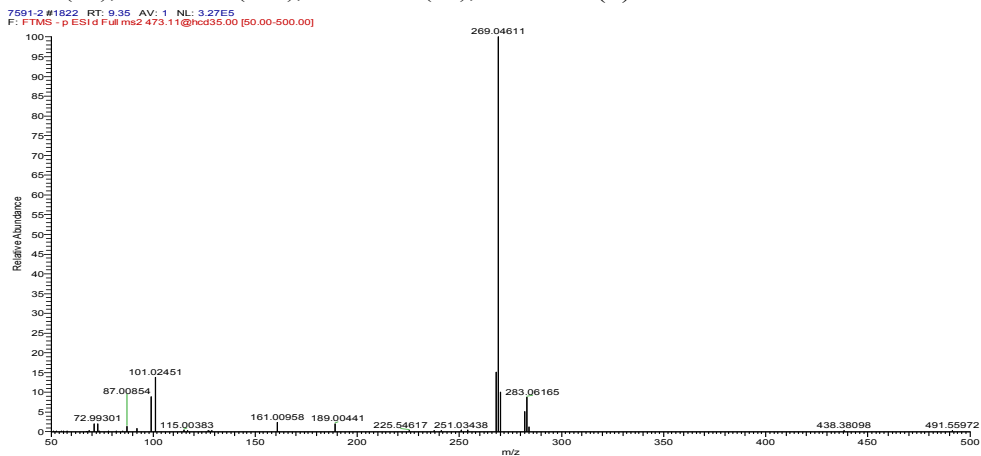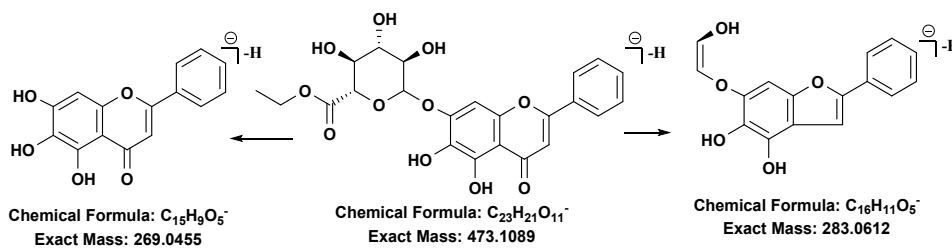

## S18

Isomer of viscidulin II 2'-*O*-glucuronide ( $t_R=7.13$  min)

MS<sup>1</sup>(-):

505.09920

MS<sup>2</sup>(-):

329.06656(28),314.04343(100),299.02014(27),269.04565(5),196(3),113.02434(11),85.02942(13)

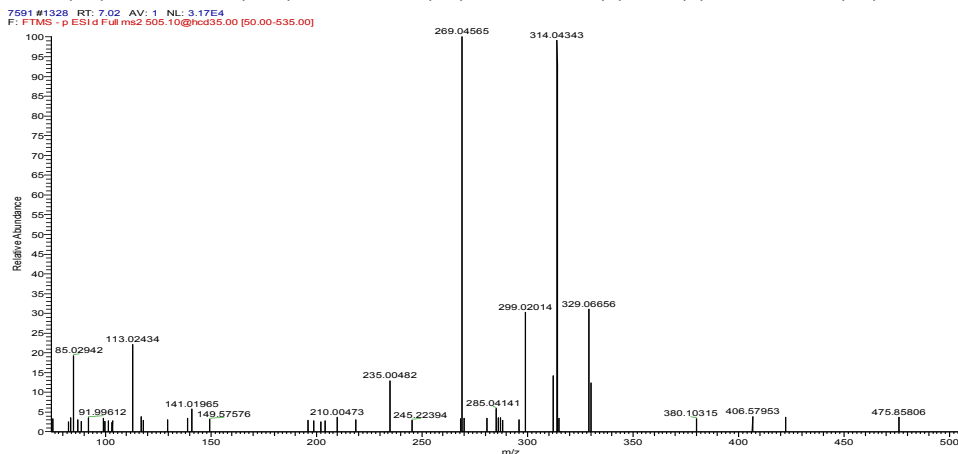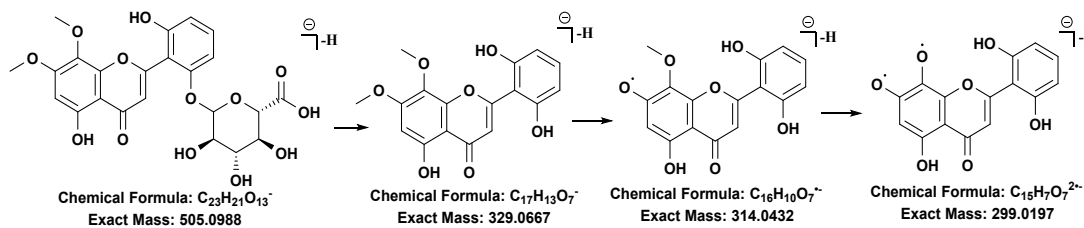

## S19

Chrysin 7-*O*-glucuronide ( $t_R=9.21$  min)<sup>61, 62</sup>

MS<sup>1</sup>(+):431.09677

MS<sup>2</sup>(+):271.05957(6),255.06471(100)

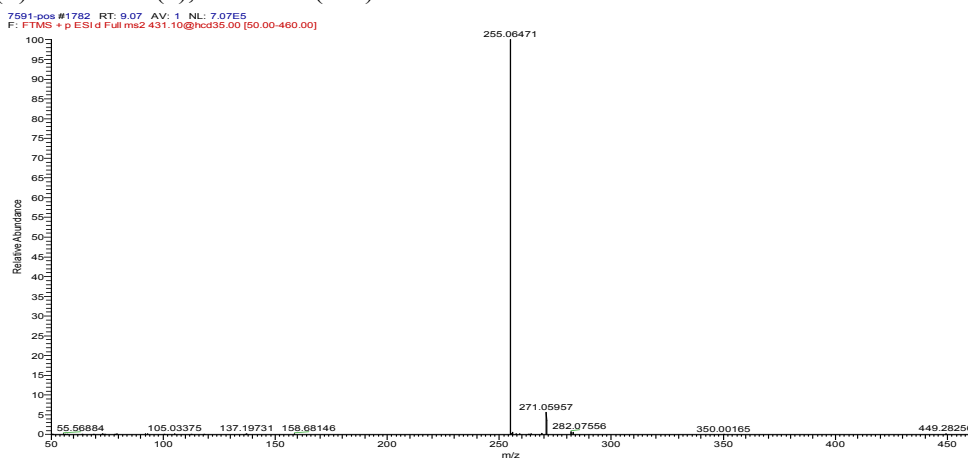

## S22

Scutellarin (tR=3.86 min)<sup>61</sup>

MS<sup>1</sup>(-):

461.07327

MS<sup>2</sup>(-):

371.07819(6),341.06790(20),299.05603(12),285.04077(100),271.06216(3),245.05(3),227.07204(4),211.04077(3)

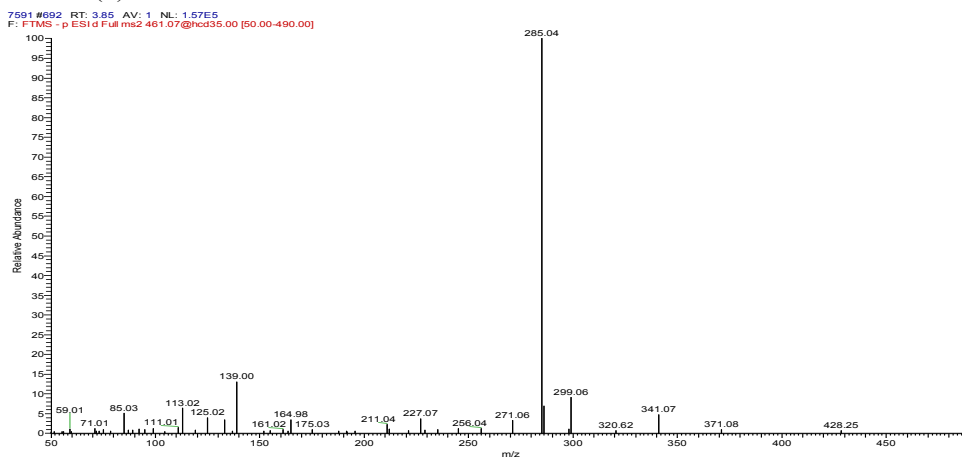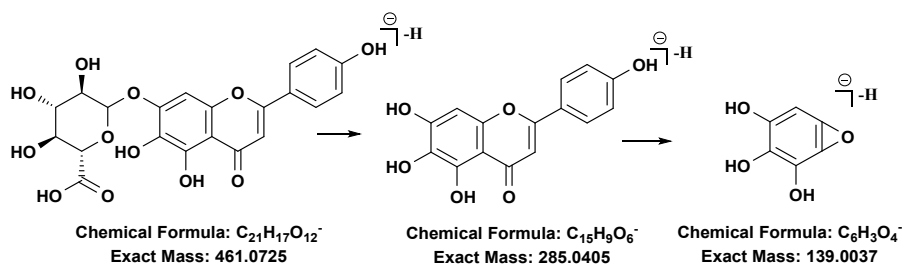

## S23

### Trihydroxy-methoxyflavone-*O*-glucoside ( $t_R=9.77$ min)<sup>61</sup>

MS<sup>1</sup>(-):

461.1091

MS<sup>2</sup>(-):

299.05609(38),284.03268(83),283.02502(100),269.04312(2),268.03726(1),253.05077(20),211.04008

008(9),173.06068(2)

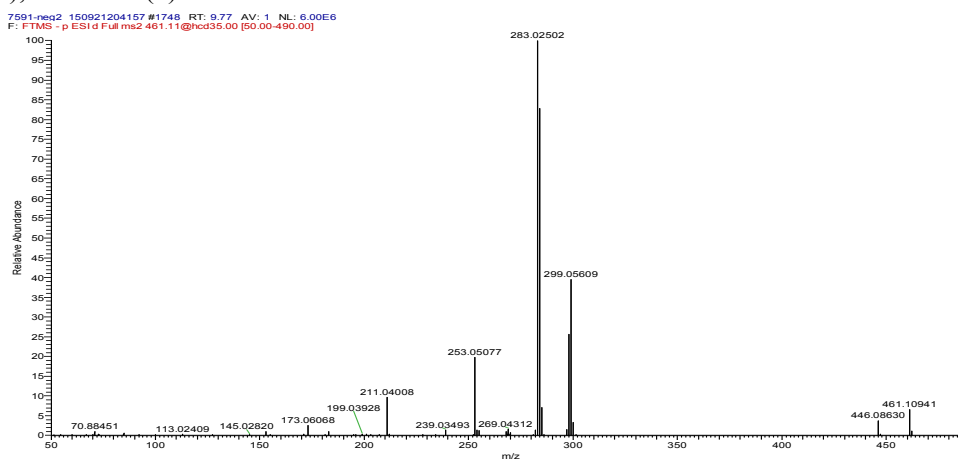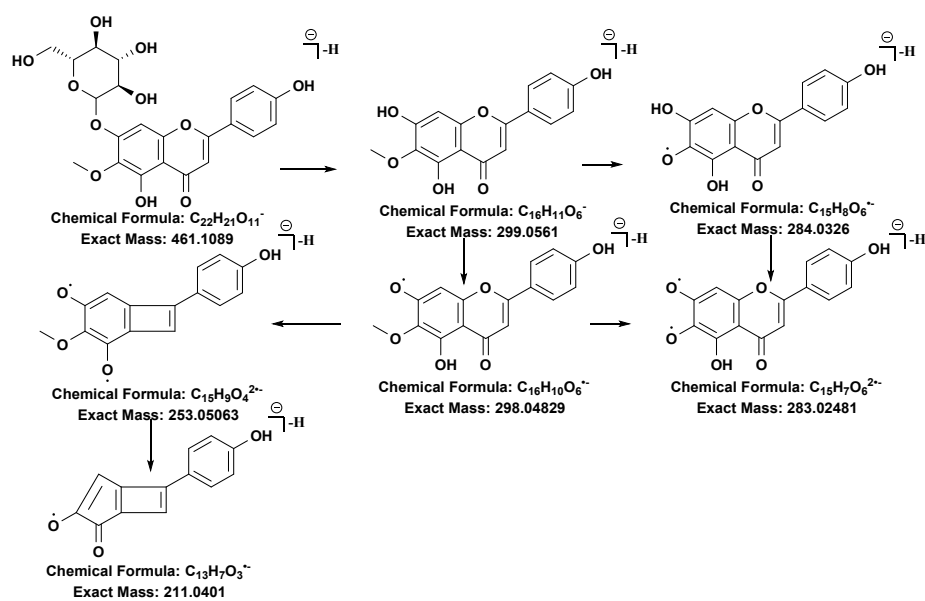



## S24

### 5,7,2'-Trihydroxy-6-methoxyflavanone 7-O-glucuronide ( $t_R=4.60$ min)<sup>61</sup>

MS<sup>1</sup>(-):

477.10424

MS<sup>2</sup>(-):

301.07242(70), 286.04889(100), 181.01442(21), 165.99094(13)

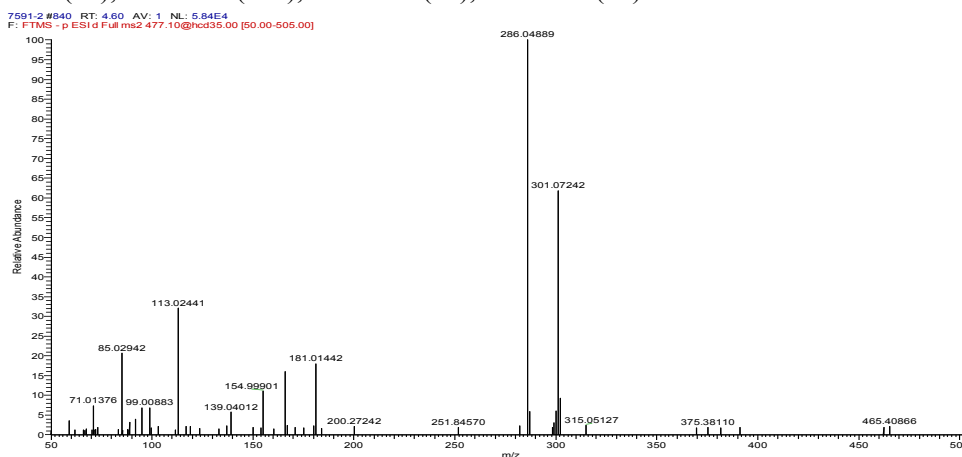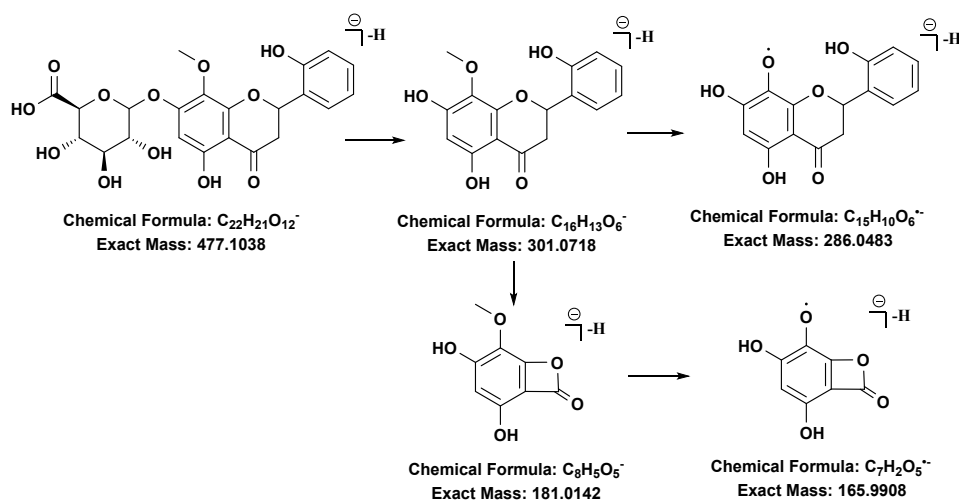

## S26, S27, S36, and S37

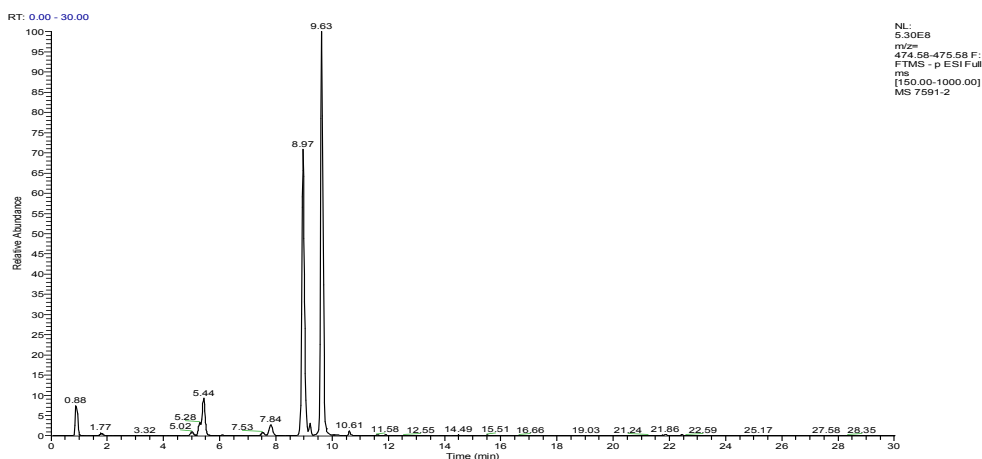

### S26 Isomer of 37 (trihydroxy-methoxyflavone *O*-glucuronide) ( $t_R=5.27$ min)

MS<sup>1</sup>(-):

475.08834

MS<sup>2</sup>(-):

299.05655(58),284.03311(100)

### S27 Isomer of 37 (trihydroxy-methoxyflavone *O*-glucuronide) ( $t_R=9.47$ min)

MS<sup>1</sup>(-):

475.08809

MS<sup>2</sup>(-):

299.05637(50),284.03305(100),270.04959(5)

### S36 Isomer of 37 (trihydroxy-methoxyflavone *O*-glucuronide) ( $t_R=7.59$ min)

MS<sup>1</sup>(-):

475.08836

MS<sup>2</sup>(-):

299.05658(100),284.03305(59),270.10849(0.5)

**S37 5,7,2'-Trihydroxy-6-methoxyflavone 7-O-glucuronide ( $t_R=8.84$  min)<sup>61</sup>**

MS<sup>1</sup>(-):

475.08832

MS<sup>2</sup>(-):

299.05643(30),284.03299(100),267.02997(0.3),239.03540(0.2),228.04262(0.4),200.04805(1),153.

01936(1),129.01955(1),113.02440(6),85.02940(7)

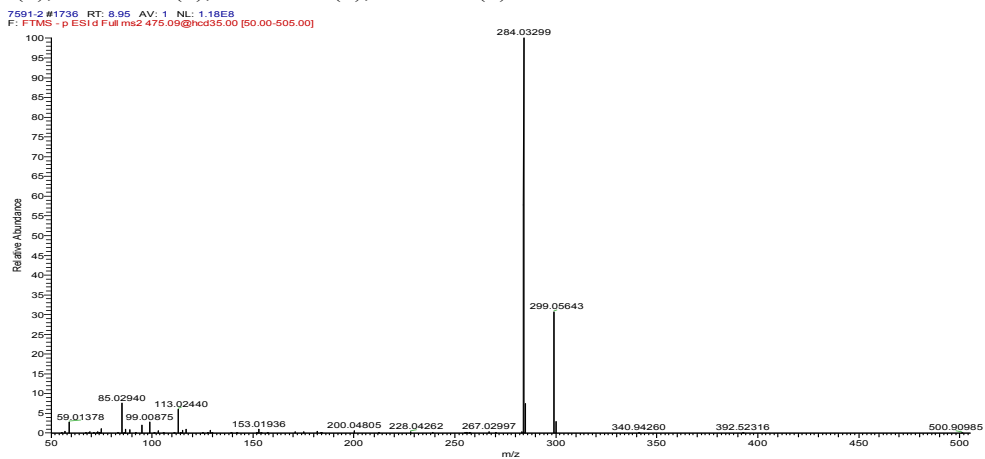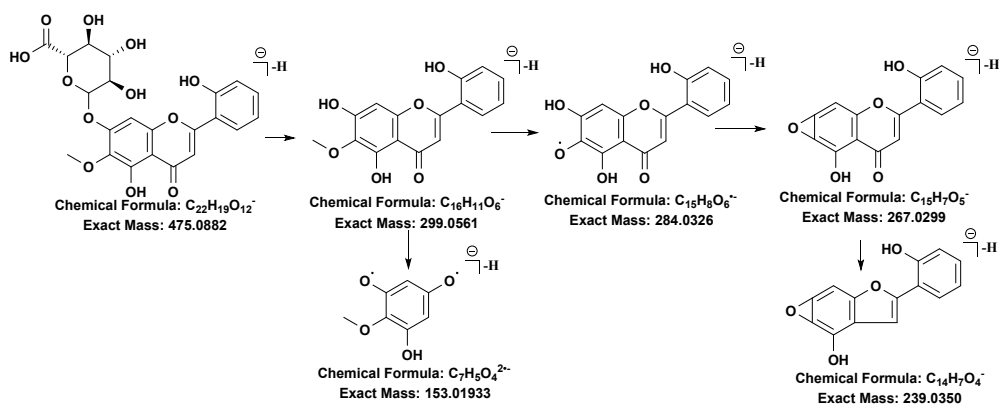

Dihydrobaicalin (tR 7.98)<sup>61, 62</sup>MS<sup>1</sup>(-):

447.07795

MS<sup>2</sup>(-):

271.06250(100), 253.05099(8), 243.06644(25)

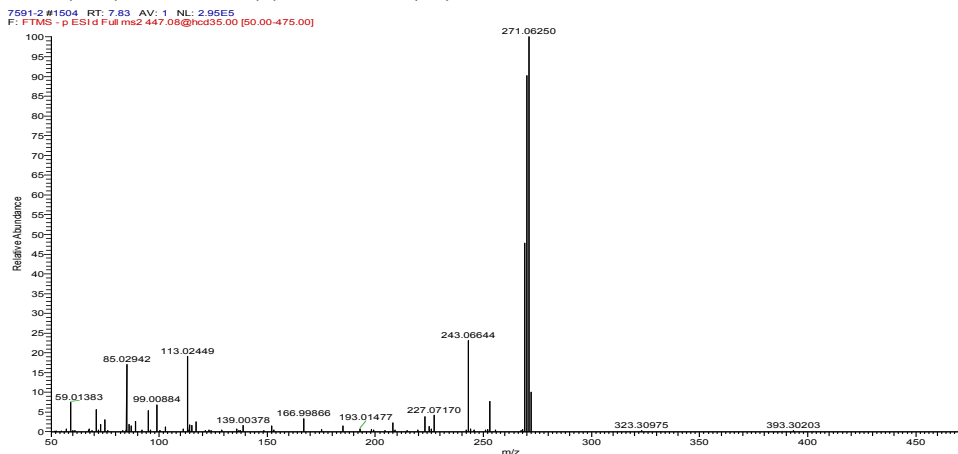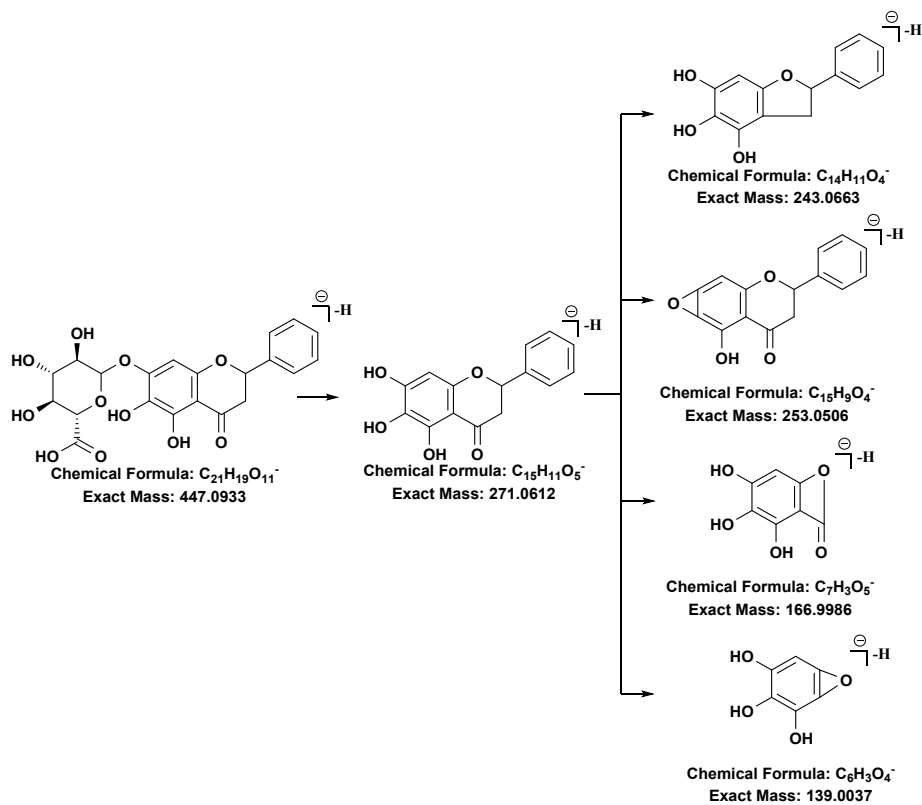

S30

Dihydroxy-methoxyflavone *O*-glucuronide-(1→6)-*O*-glucoside ( $t_R=4.91$  min)

MS<sup>1</sup>(-):

621.14659

MS<sup>2</sup>(-):

445.11441(70),430.09079(59),283.06143(49),268.03781(100),267.03018(93),239.03525(2),175.02502(3),117.02(3),113.02444(25),103.00378(3),99.00882(7),95.01390(7),85.02956(21)

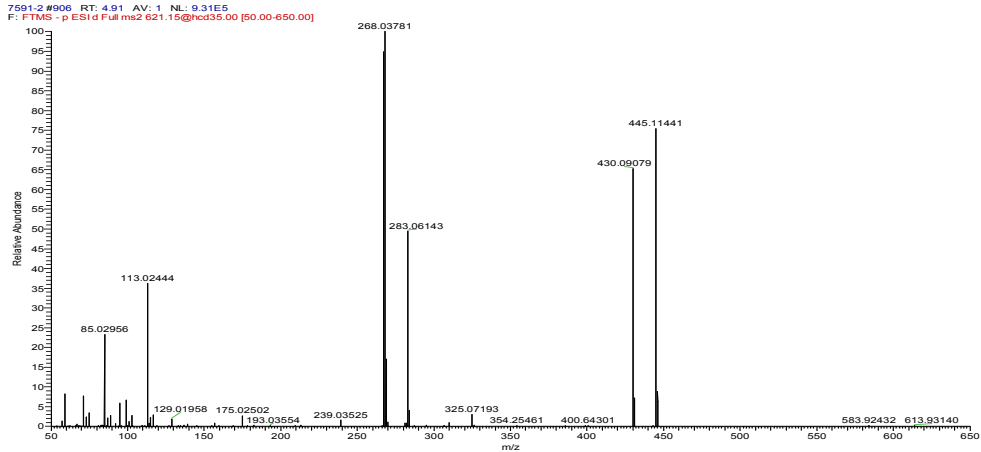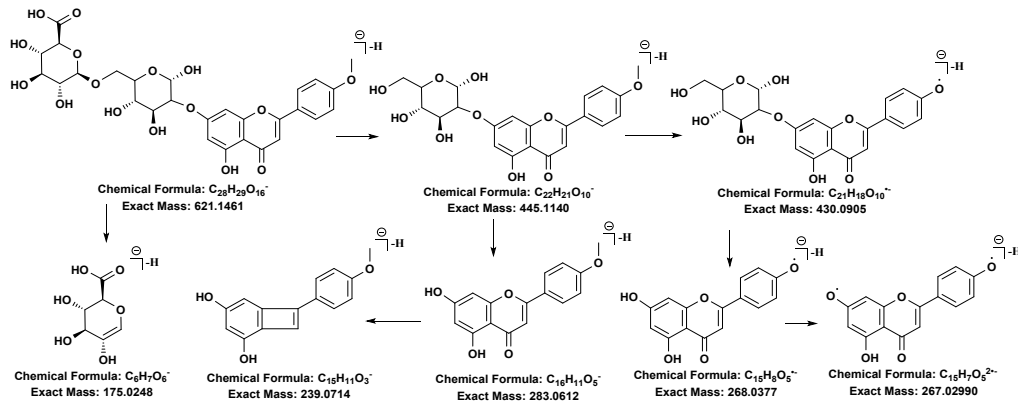

### S31, S44, S48, and S101

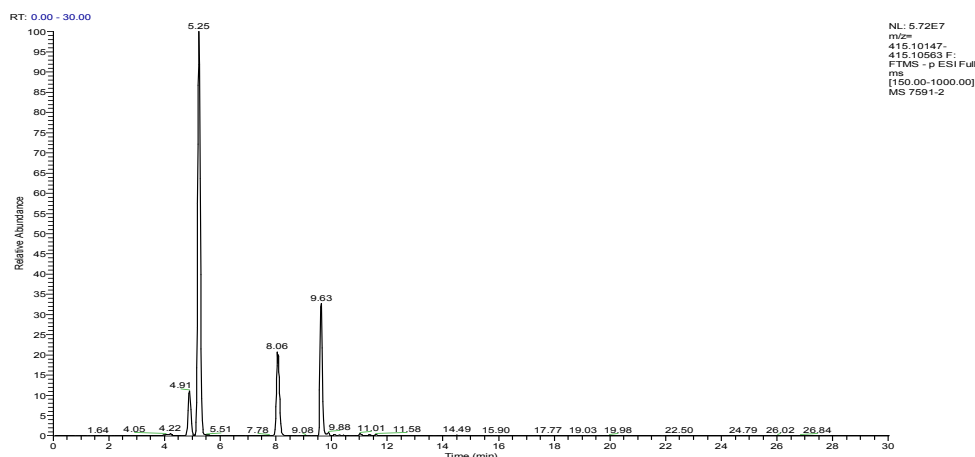

**S31 Chrysin 7-*O*-glucoside OR isomer (Trihydroxyflavone *O*- glucoside) ( $t_R=9.61$  min)<sup>69, 70</sup>**

**MS<sup>1</sup>(-):**

415.10355

**MS<sup>2</sup>(-):**

295.06122(3),269.04590(2),253.05075(100),224.04839(0.2),209.06085(2)

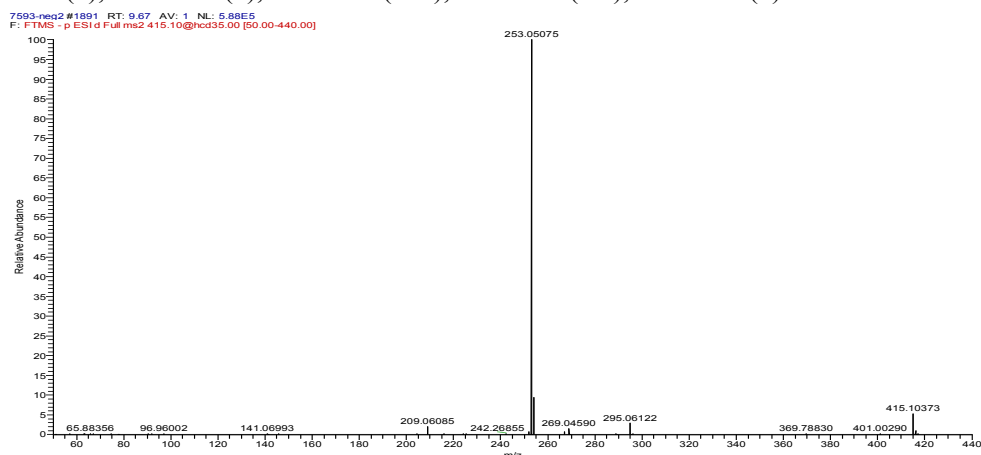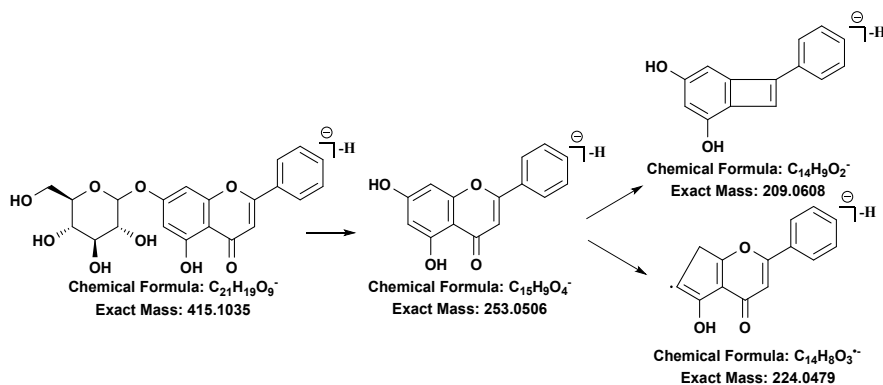

**S44 Isomer of S48 (Dihydroxyflavone *C*-glucoside) ( $t_R=5.12$  min)**

**MS<sup>1</sup>(-):**415.10373

**MS<sup>2</sup>(-):**325.07175(4),307.06094(2),295.06113(100),277.05060(1),267.06644(32),253.05106(0.5),  
227.07188(0.5),179.03456(0.6),149.02438(2)

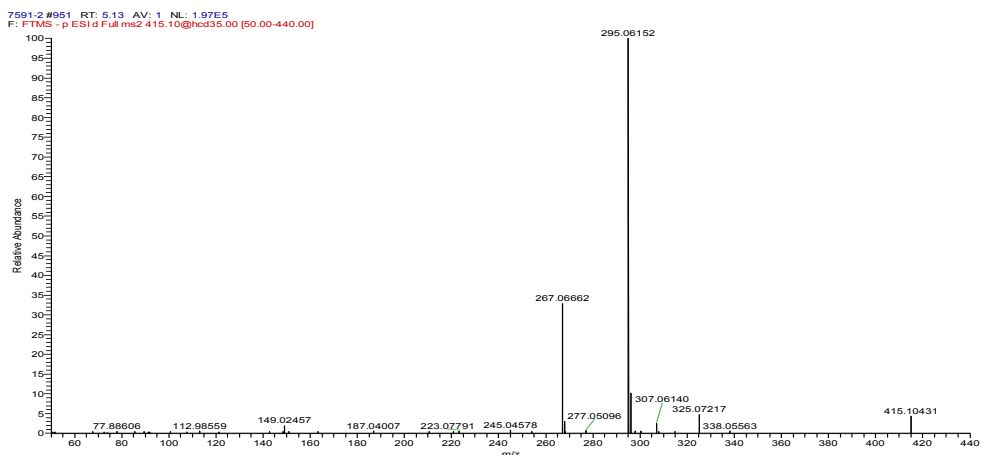

**S48 Chrysin 6-C-glucoside ( $t_R=8.03$  min)<sup>61</sup>**

MS<sup>1</sup>(+):

415.10413 (positive)

MS<sup>2</sup>(+):

325.07217(33),295.06152(100),267.06662(25),253.05095(3),223.07791(0.5),151.05568(0.1)

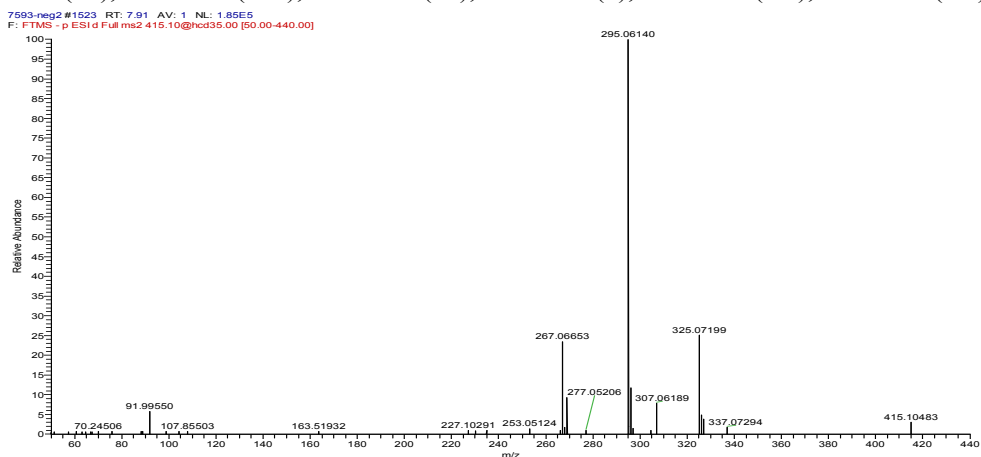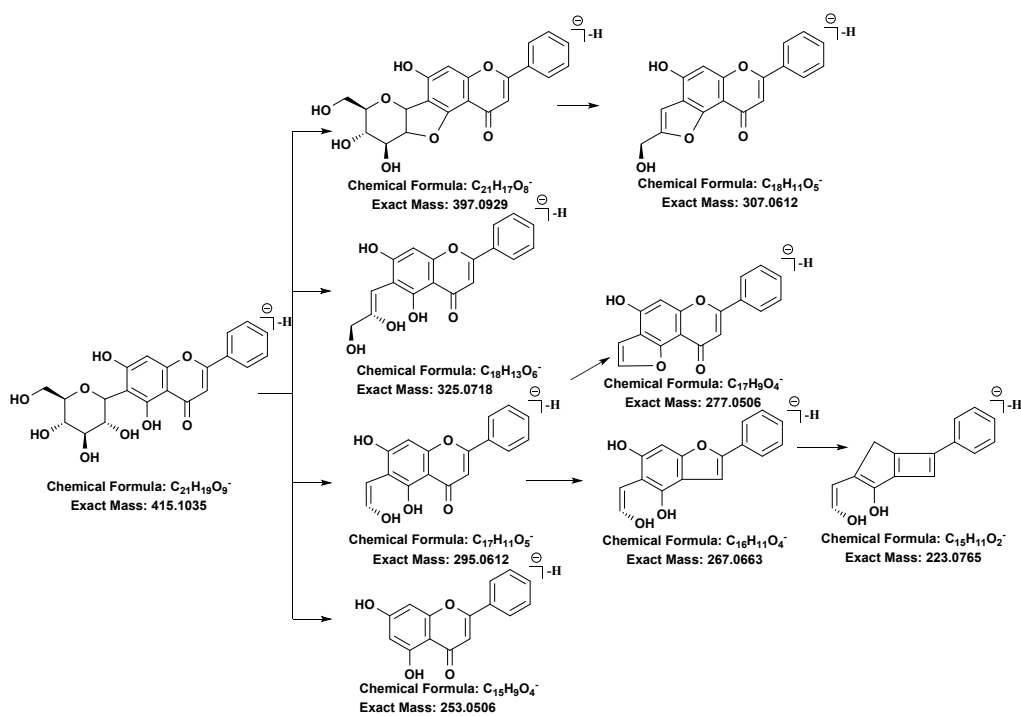

**S101 Chrysin 8-C-glucoside ( $t_R=5.22$  min)<sup>61</sup>**

MS<sup>1</sup>(+):

415.10431

MS<sup>2</sup>(+):

325.07217(5),295.06152(100),267.06662(31),245.04578(1),223.07791(0.5),187.07007(0.5),149.02457(2)

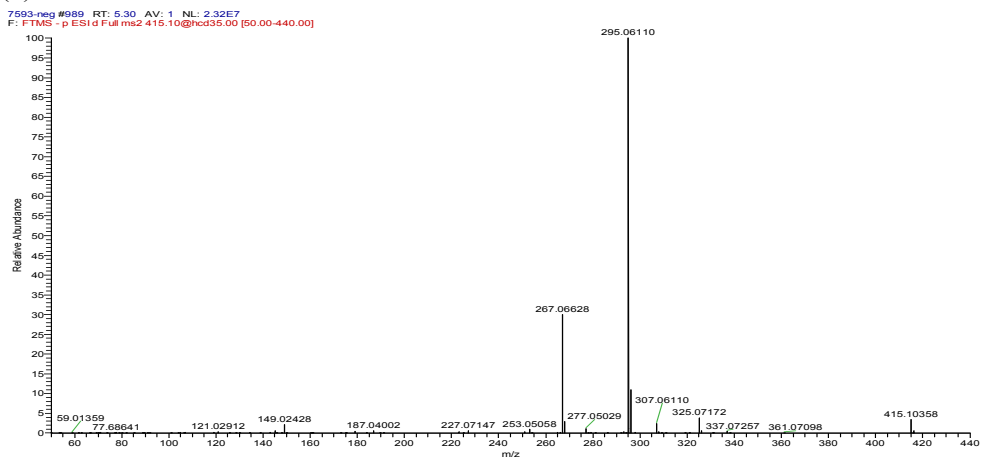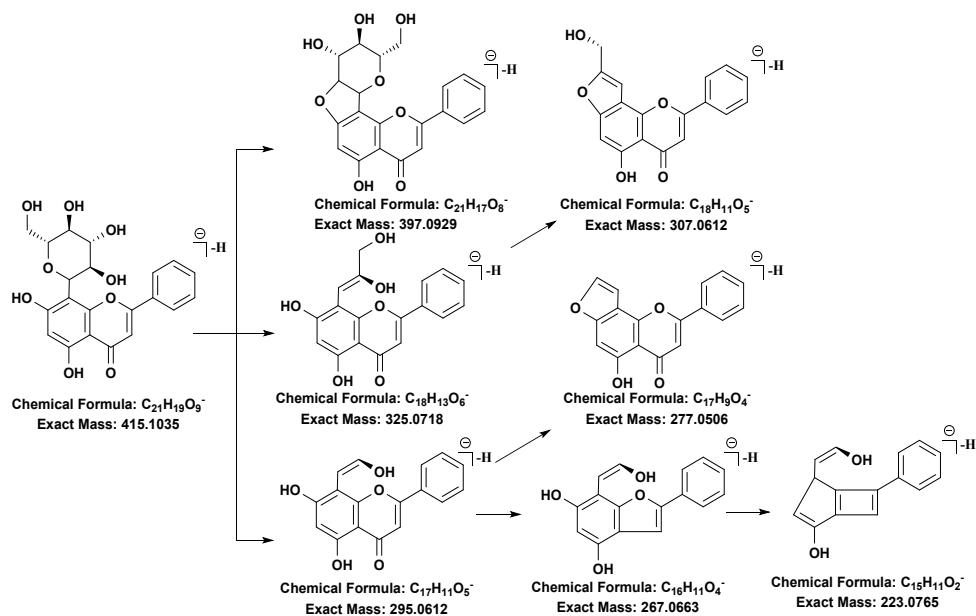



# S32

**Trihydroxyflavone *O*-glucuronide-(1→2)-*O*-glucoside ( $t_R=6.02$  min)<sup>66</sup>**

MS<sup>1</sup>(-):

607.13129

MS<sup>2</sup>(-):

445.18335(1), 269.04572(100), 113.02447(1)

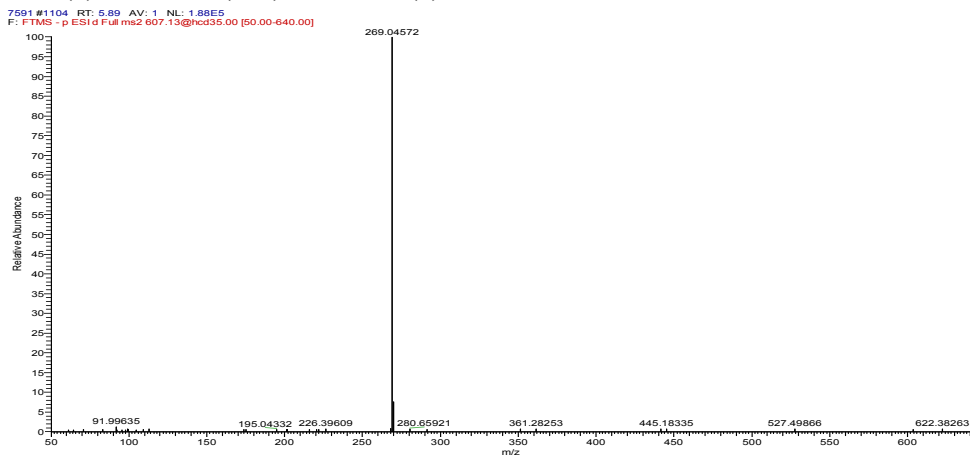

5,7-Dihydroxy-8,2'-dimethoxyflavone 7-*O*-glucuronide ( $t_R=10.27$  min)<sup>61, 62</sup>MS<sup>1</sup>(-):

489.10400

MS<sup>2</sup>(-):

313.07257(24),298.04871(100),283.02521(29),281.04529(4),269.04565(2),239.03593(2),211.040

42(5)

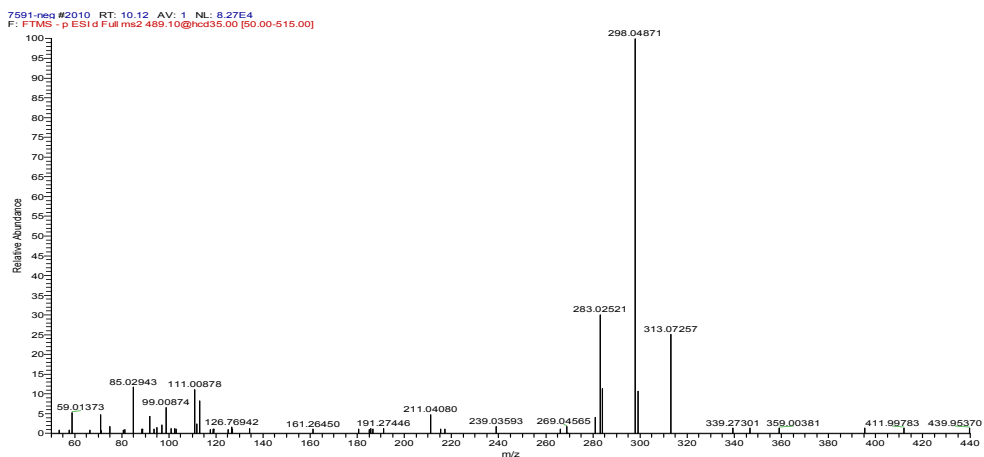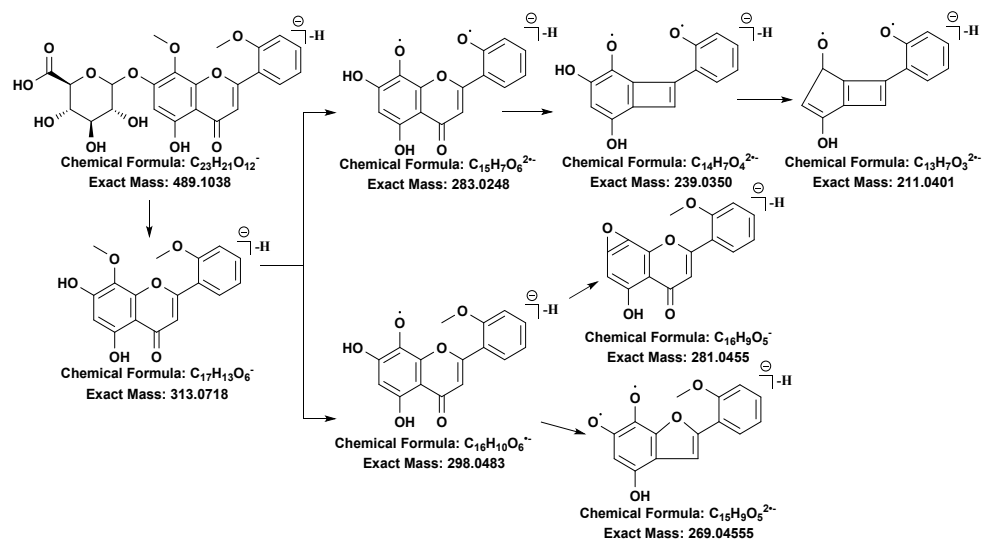

### S34

#### Viscidulin III 6'-*O*-glucoside ( $t_R=4.13$ min)<sup>61</sup>

MS<sup>1</sup>(-):

507.11461

MS<sup>2</sup>(-):

492.09247(1),345.06189(15),330.03836(100),315.01505(14)

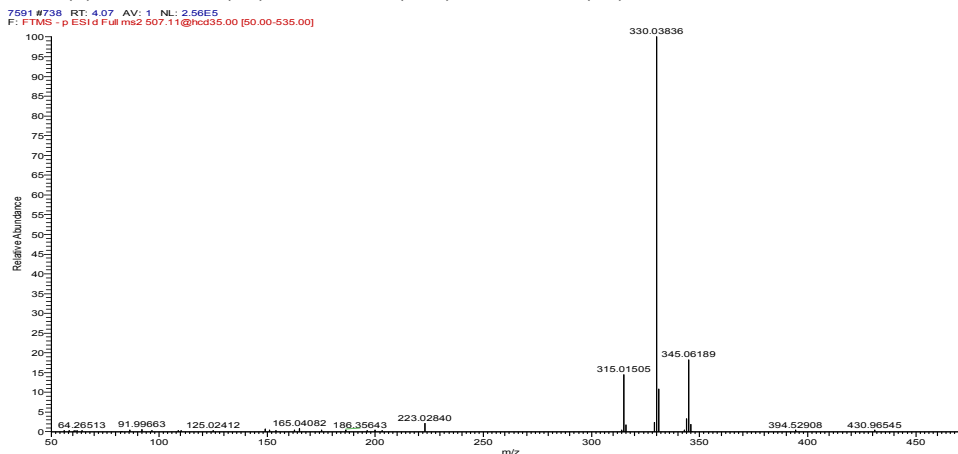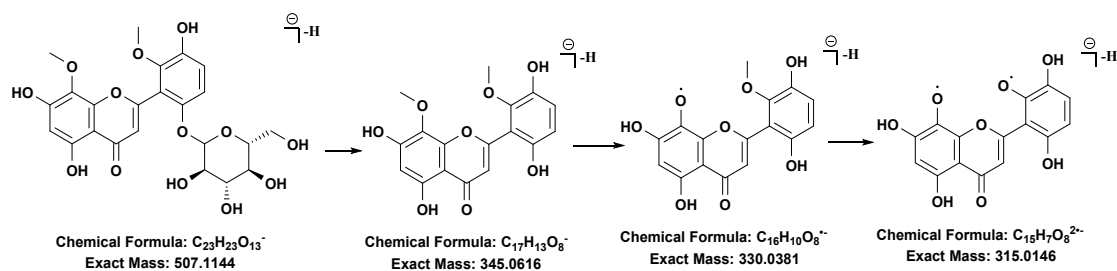

### S35

#### Wogonin 5-glucoside ( $t_R=9.35$ min)<sup>61</sup>

MS<sup>1</sup>(+):447.12802

MS<sup>2</sup>(+):285.07462(100),270.05118(17),241.04947(0.1)

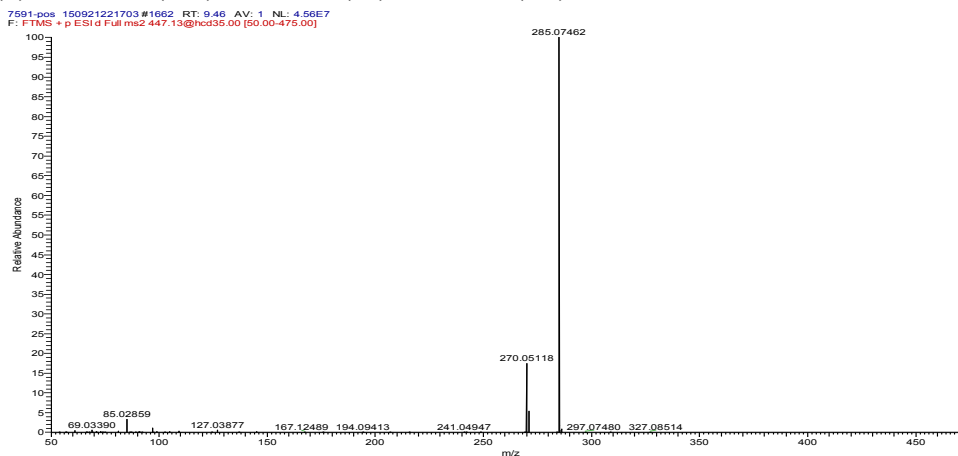

Dihydroxy-tetramethoxyflavone *O*-glucuronide ( $t_R=10.95$  min)MS<sup>1</sup>(+):

551.13891

MS<sup>2</sup>(+):

375.10657(100),360.08340(9),345.05960(13),342.07269(3),329.06488(0.3),327.04913(4),227.054

61(3),177.05432(1)

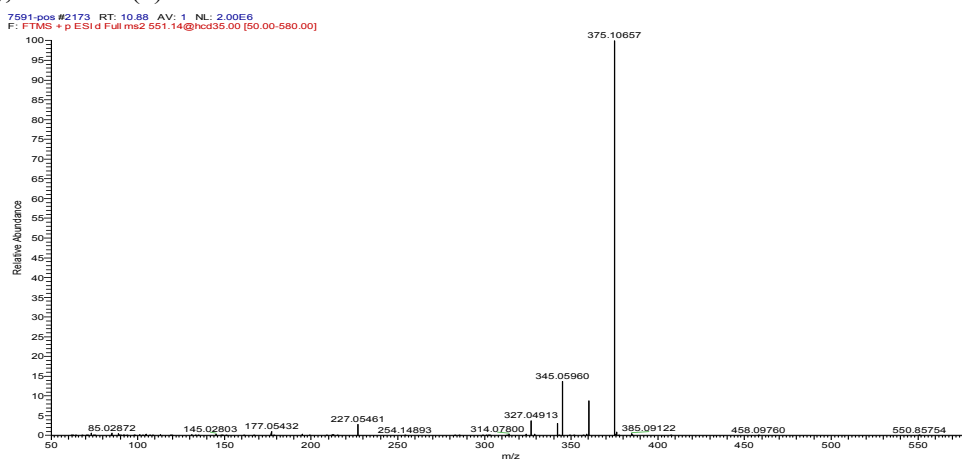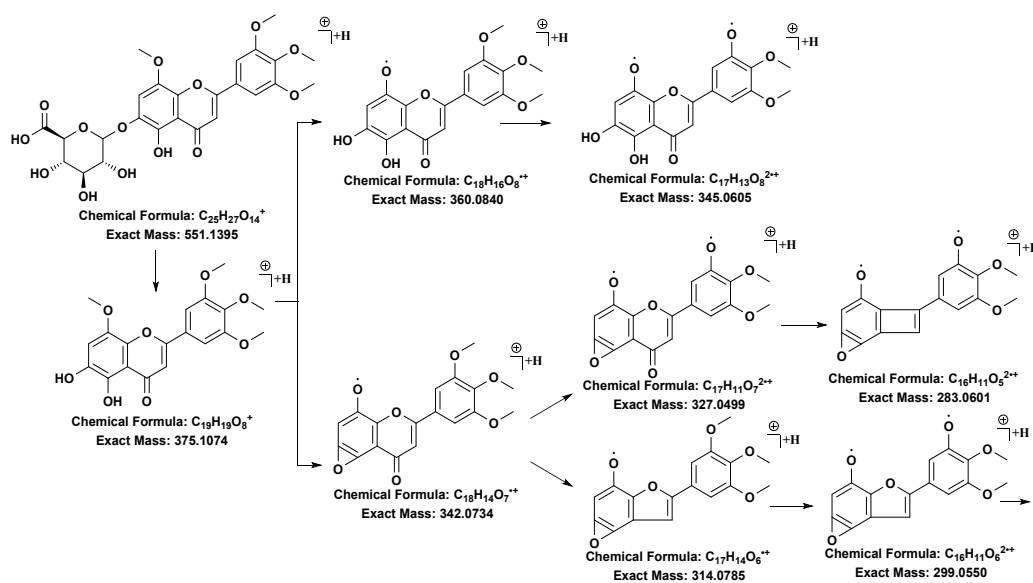

## S41, S42, and S43

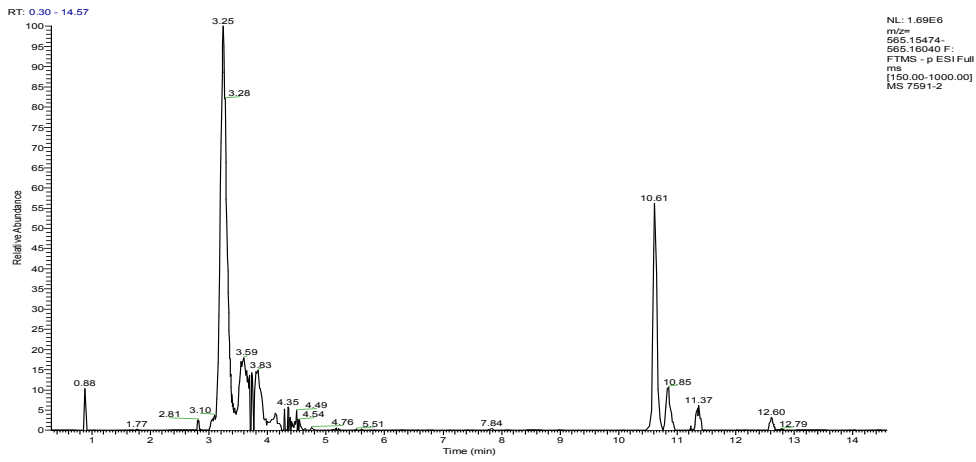

**S41 Isomer of Pinobanksin 8-C-arabinoside 6-C-glucoside (Containing C-glycosides) ( $t_R=3.87$  min)**

MS<sup>1</sup>(-):

565.15757

MS<sup>2</sup>(-):

367.08337(1),337.07230(2),329.08737(8),299.07730(9),269.6674(40),239.05615(97),209.04556(100)

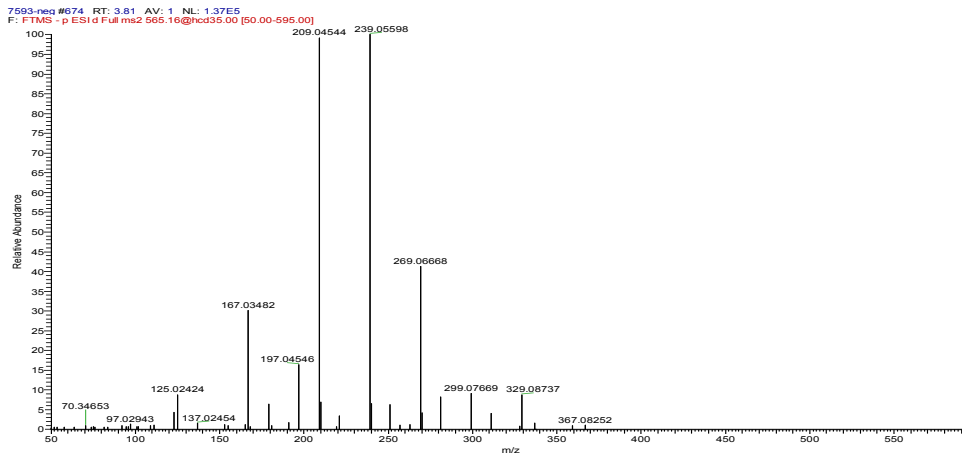

**S42 Isomer of Pinobanksin 8-C-arabinoside 6-C-glucoside (containing C-glycosides) ( $t_R=3.57$  min)**

MS<sup>1</sup>(-):

565.15700

MS<sup>2</sup>(-):

329.08783(4),299.07840(10),269.06689(41),239.05627(100),209.04572(95)

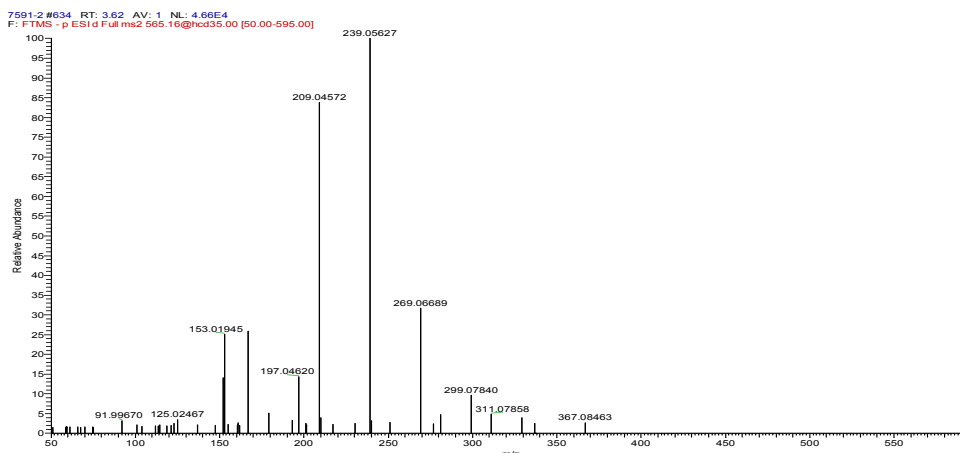

**S43 Isomer of Pinobanksin 8-C-arabinoside 6-C-glucoside (Containing C-glycosides) ( $t_R=3.24$  min)**

MS<sup>1</sup>(-):

565.15653

MS<sup>2</sup>(-):

329.08795(7),299.07770(10),269.06622(43),239.05637(100),209.04559(89)

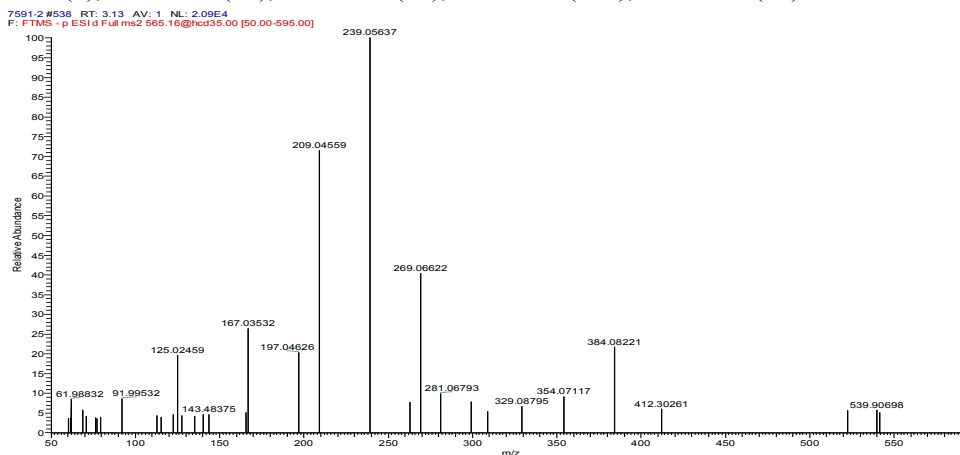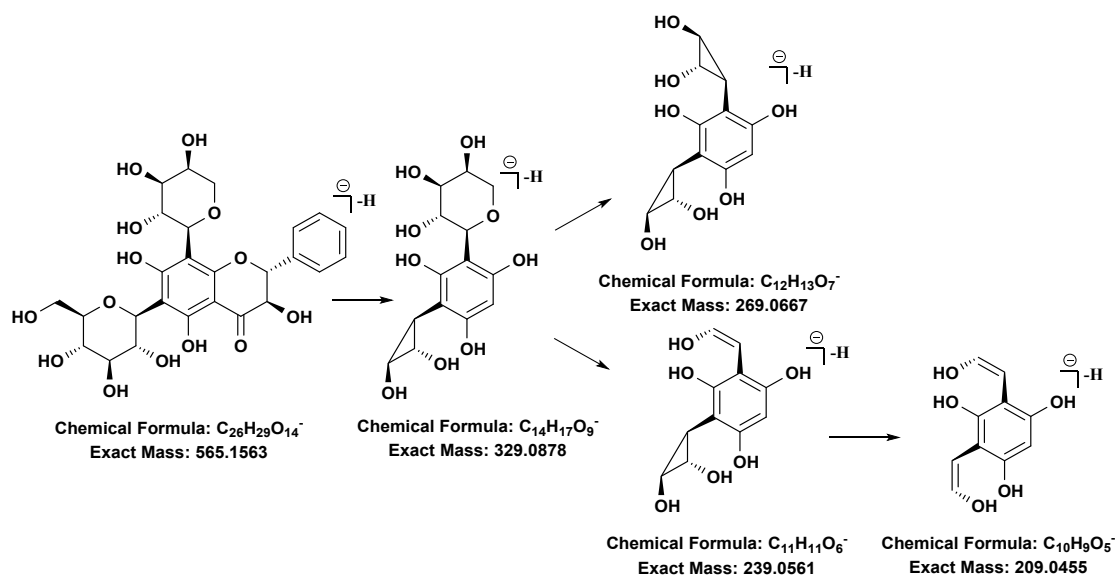

## S45

### Chrysin 6,8-di-C-glucopyranoside ( $t_R=3.13$ min)<sup>71</sup>

MS<sup>1</sup>(-):

577.15683

MS<sup>2</sup>(-):

577.15729(14), 487.12531(11), 457.11462(32), 439.10440(3), 397.09293(6), 367.08258(58), 337.072

24(100)

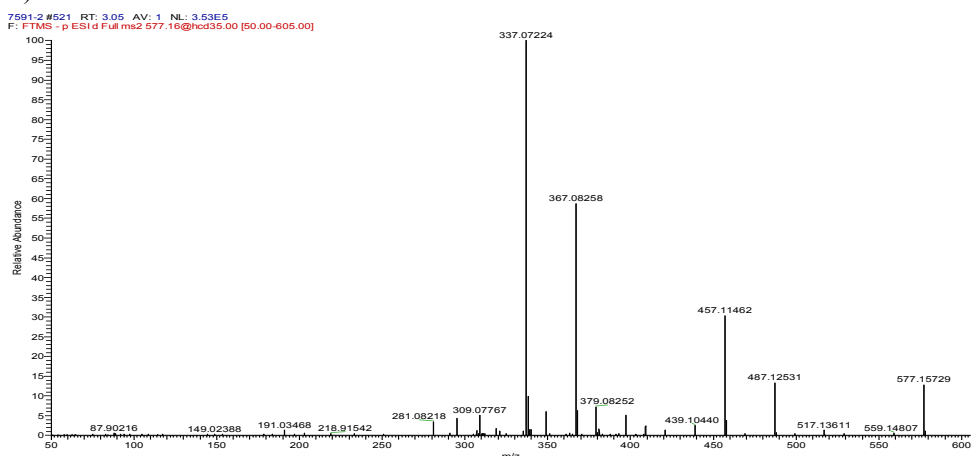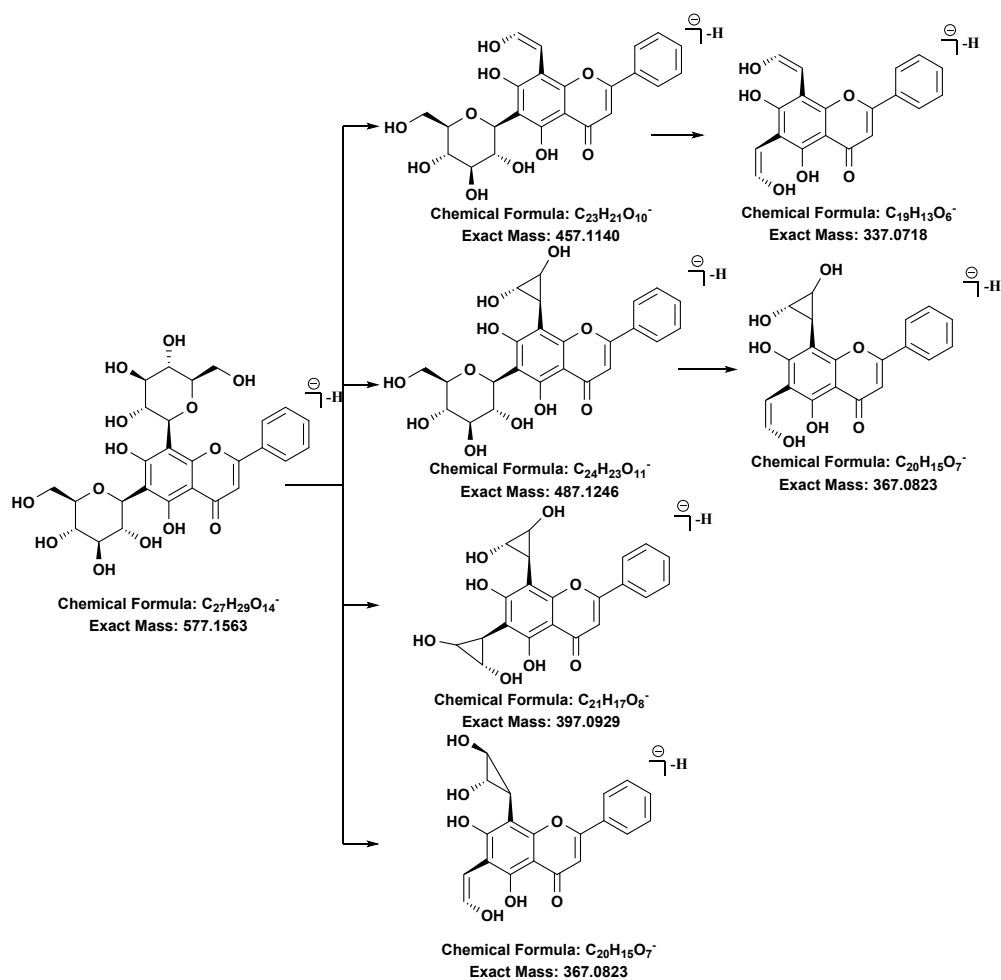

## S47

**6-hexosyl-8-C-pentosyl chrysin ( $t_R=5.10$  min)<sup>61</sup>**

MS<sup>1</sup>(-):547.1462

MS<sup>2</sup>(-):547.14624(16),487.12512(17),457.11450(23),427.10364(40),397.09360(31),367.08234(100),337.07205(70),309.07745(6)

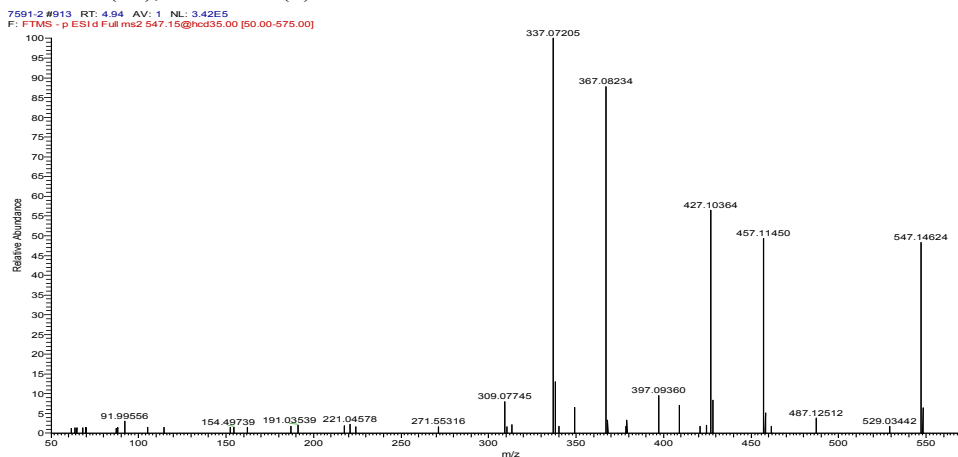

## S49

**Skullcapflavone ( $t_R=14.60$  min)<sup>61</sup>**

MS<sup>1</sup>(-):343.08222

MS<sup>2</sup>(-):328.06003(12),313.03540(100),298.01190(16),270.01706(2)

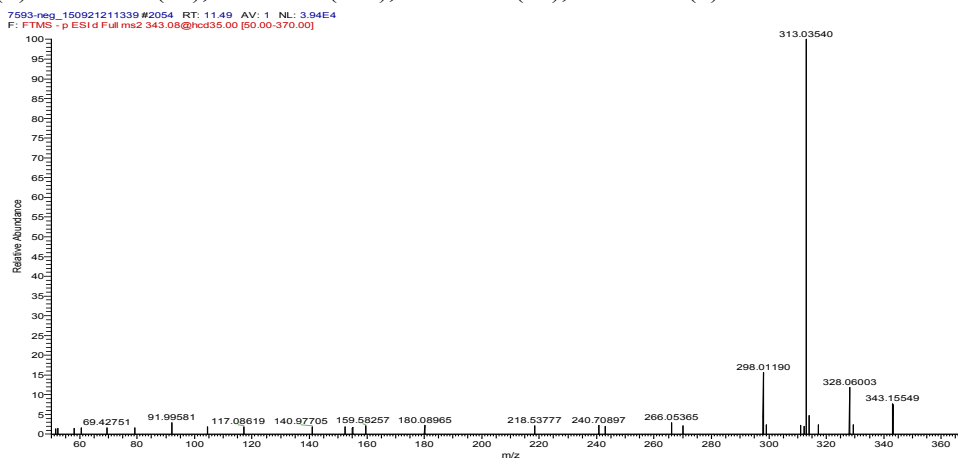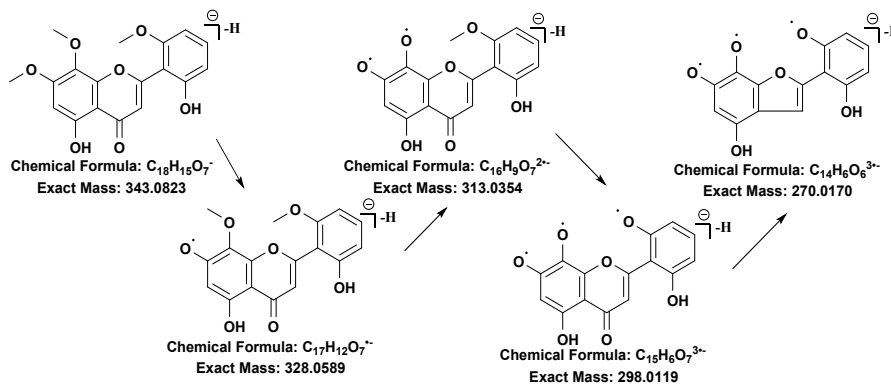



S50

2',5,6-Trihydroxy-7,8-dimethoxyflavone 6-O-sulfate ( $t_R=4.91$  min)<sup>70</sup>

MS<sup>1</sup>(-):409.0237

MS<sup>2</sup>(-):329.06705(100),314.04361(62),299.01993(27),195.03003(2),180.00662(3),164.98241(1),  
133.02942(2)

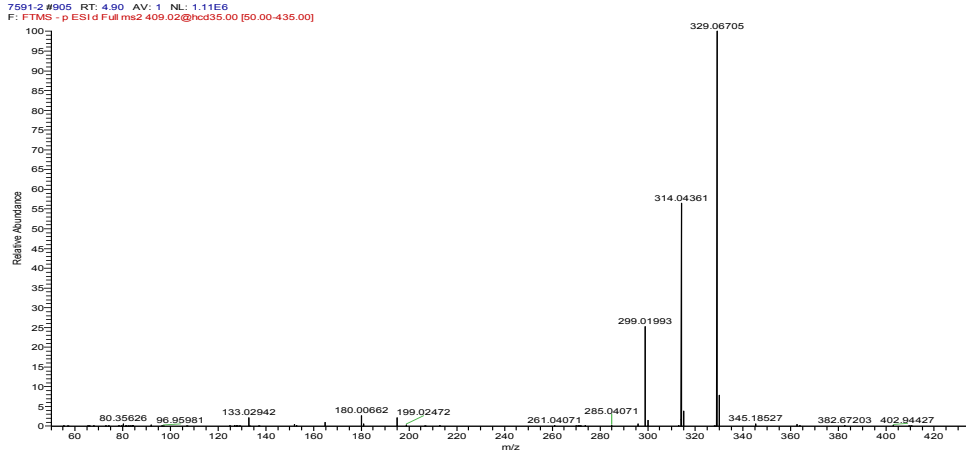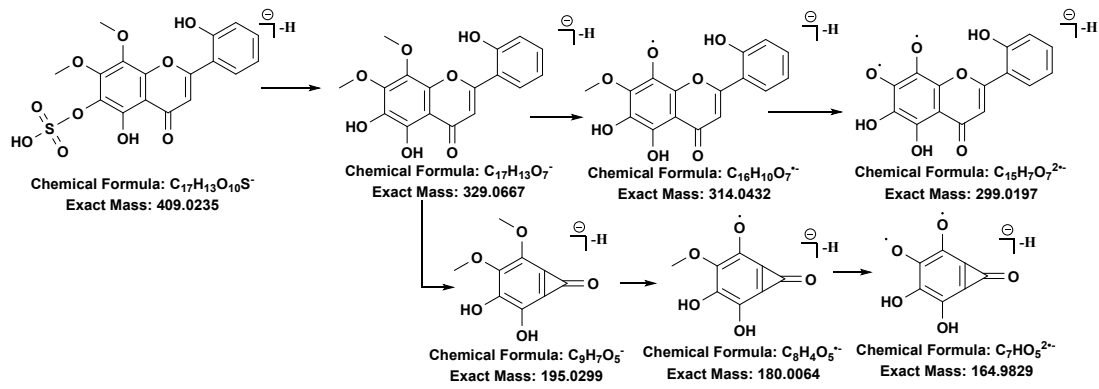

## S51, S53, S54, and S82

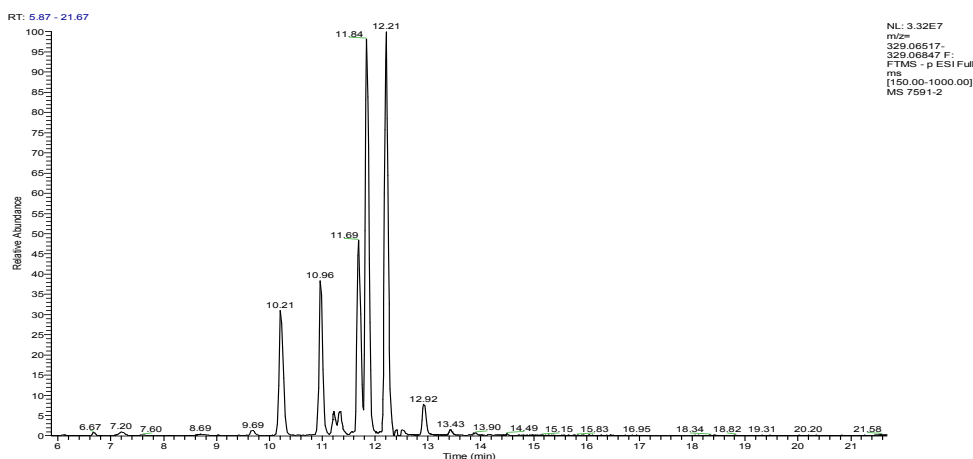

### S51 Isomer of S54 (Trihydroxy-dimethoxyflavone) ( $t_R=10.23$ min)

$MS^1(-)$ :329.06682

$MS^2(-)$ :314.04337(49),299.01974(100),285.04105(2),271.02505(2),255.02969(0.9),227.03496(0.3),180.00645(9),164.98270(6),133.02942(7)

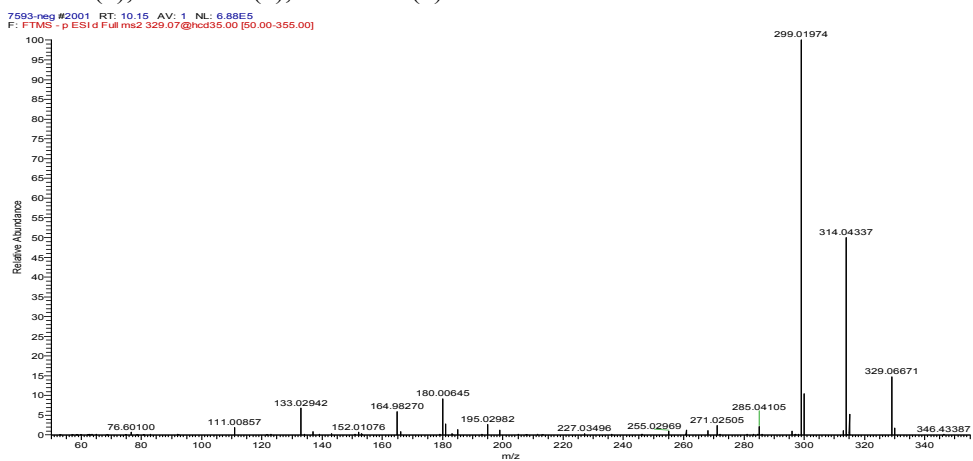

### S82 Isomer of S54 (Trihydroxy-dimethoxyflavone) ( $t_R=10.87$ min)

$MS^1(-)$ :329.06778

$MS^2(-)$ :314.04358(62),299.01959(81)283.26471(26),268.03827(25)

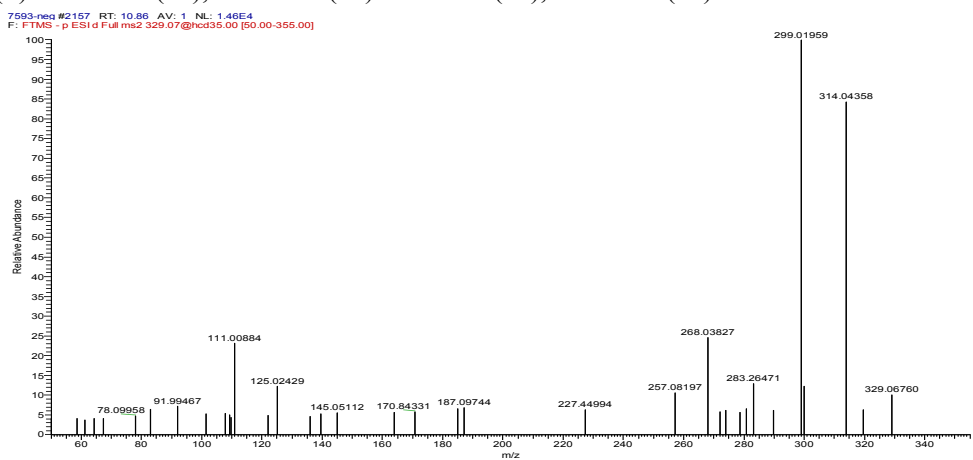

**S53 5,8,2'-Trihydroxy-6,7-dimethoxyflavone ( $t_R=12.95$  min)<sup>61</sup>**

MS<sup>1</sup>(-):329.06680

MS<sup>2</sup>(-):314.04309(61),299.01953(100),285.04083(3),271.02472(2),255.02936(0.3),227.0462(0.3),  
205.01410(0.8),180.00636(2),152.01122(2),133.02835(0.5)

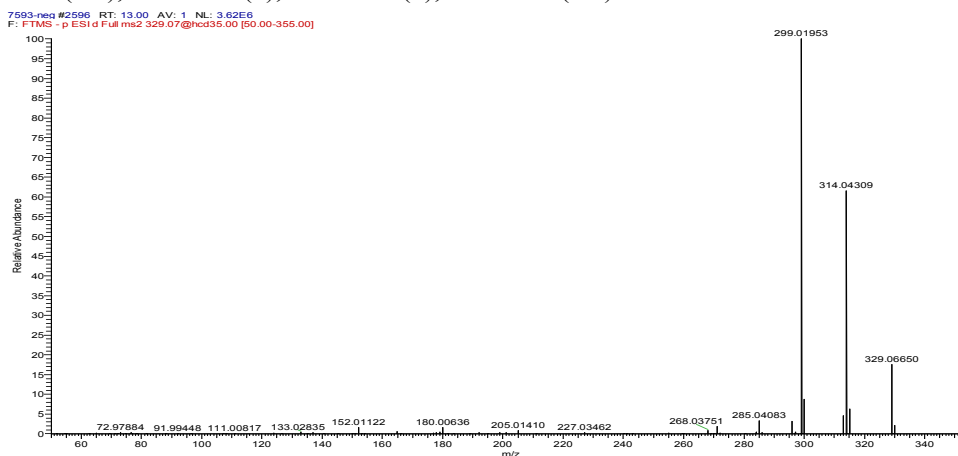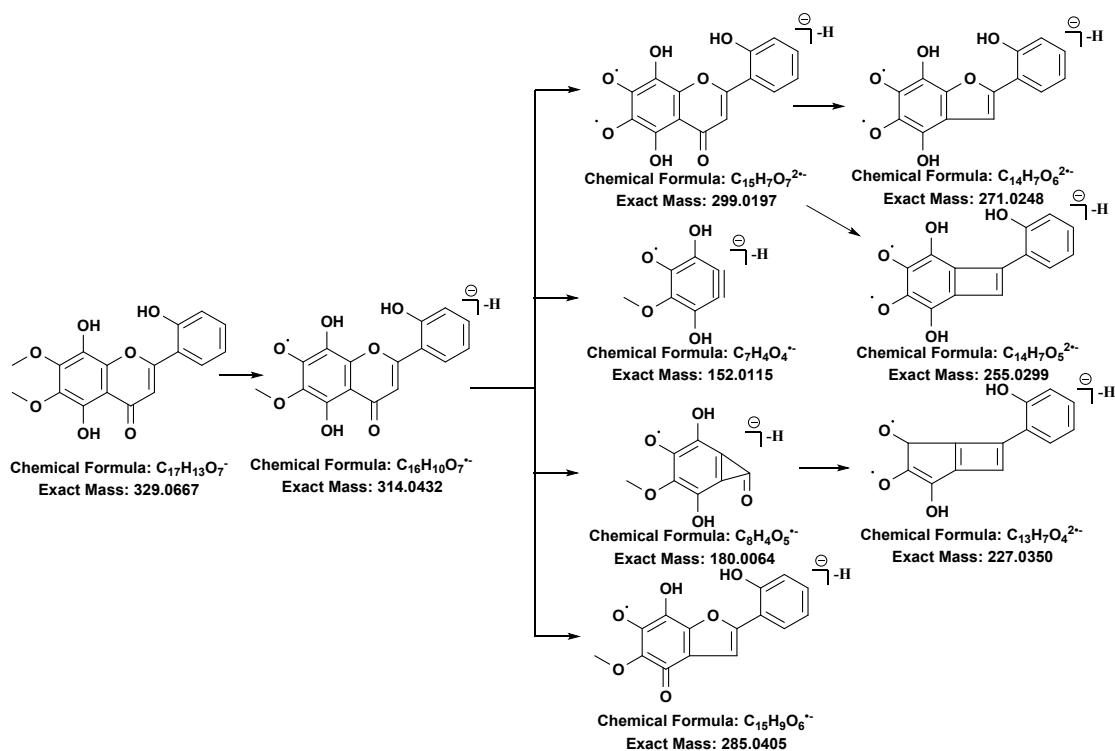

**S54 5,7,6'-Trihydroxy-8,2'-dimethoxyflavone ( $t_R=11.74$  min)<sup>61</sup>**

MS<sup>1</sup>(-):

329.06679

MS<sup>2</sup>(-):

314.04349(100),299.01993(80),255.02878(0.7),180.00696(2),165.99080(12),137.99586(6)

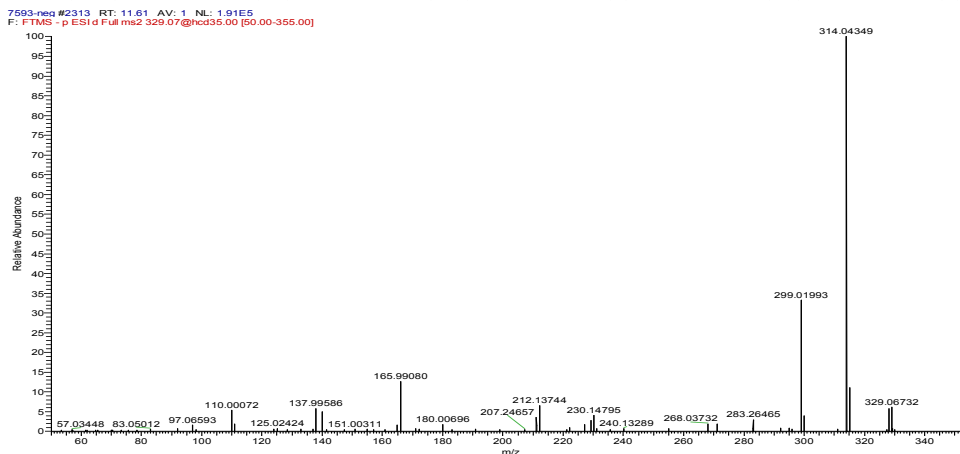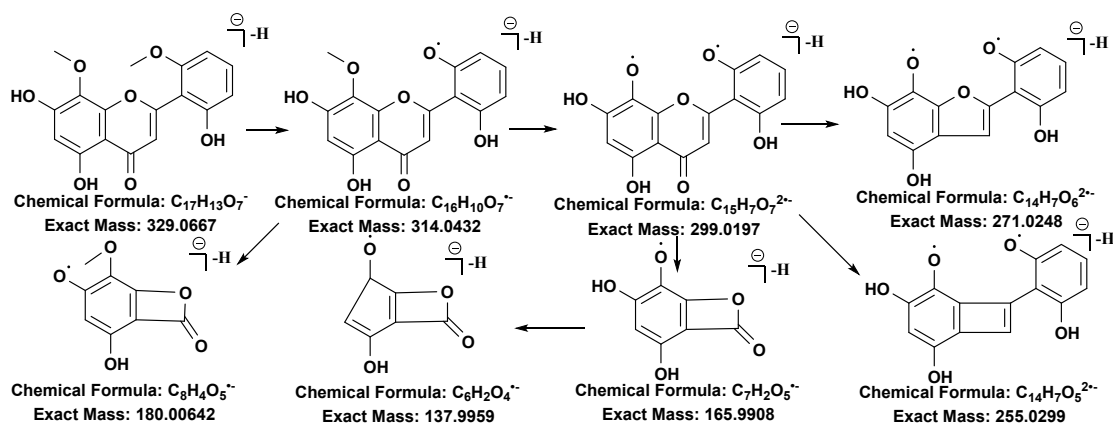

## S52, S55, S61, S63, and S69

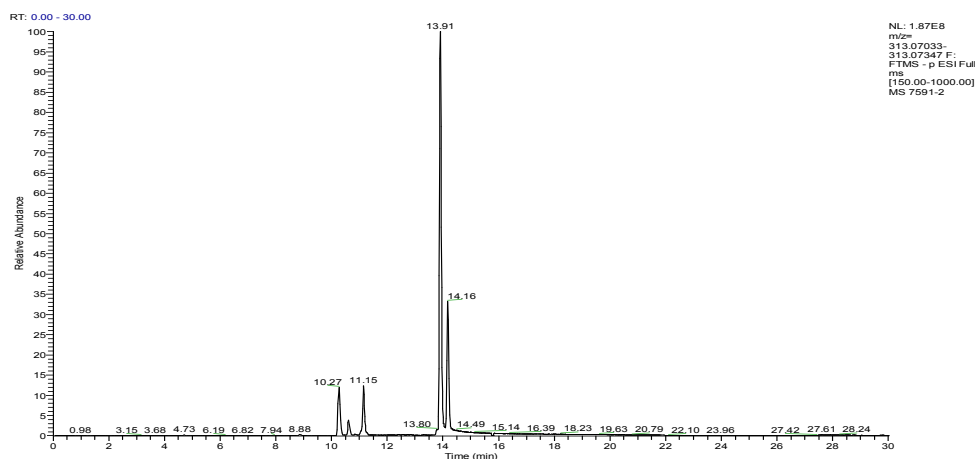

### S52 Isomer of S63 (Dihydroxy-dimethoxyflavone) ( $t_R=11.16$ min)

MS<sup>1</sup>(-):

313.07190

MS<sup>2</sup>(-):

298.04861(100), 283.02521(85), 255.03027(2), 239.03503(2), 211.04025(19), 173.06067(5)

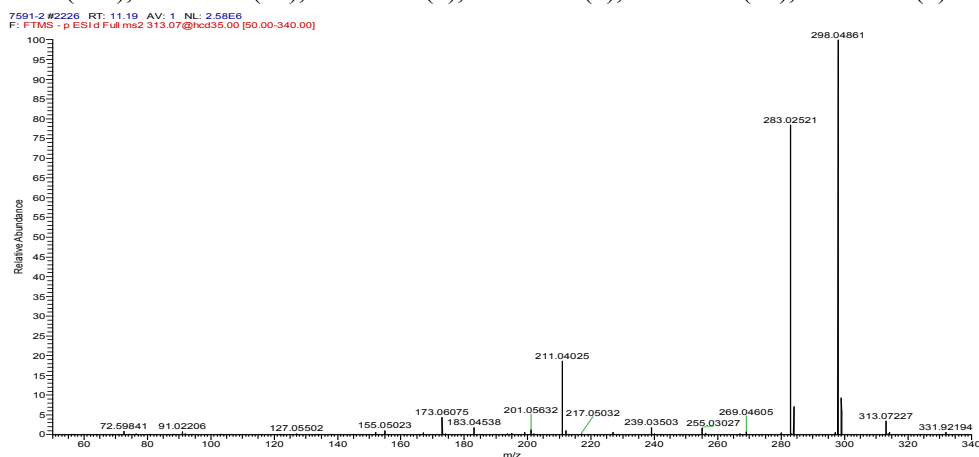

### S55 Isomer of 6-Methoxywogonin (Dihydroxy-dimethoxyflavone) ( $t_R=10.27$ min)

MS<sup>1</sup>(-):

313.07188

MS<sup>2</sup>(-):

298.04871(100), 283.02530(87), 269.04614(78), 255.12172(4), 211.04001(18), 167.04(5), 145.02962(15), 91.02(28)

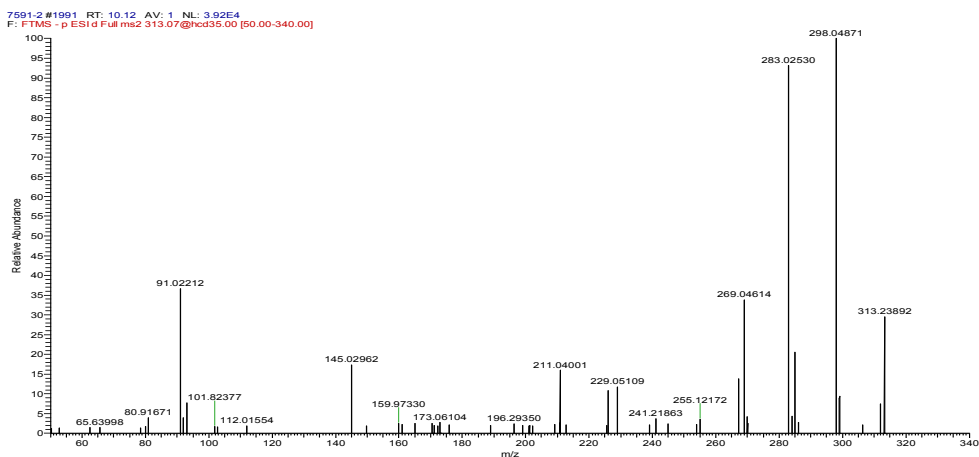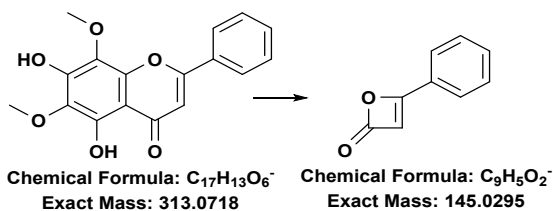

**S61 5,8-Dihydroxy-6,7-dimethoxyflavone ( $t_R=14.19$ )<sup>61, 62</sup>**

MS<sup>1</sup>(-):

313.07224

MS<sup>2</sup>(-):

298.04852(100),283.02515(87),269.04590(21),255.03026(2),239.03487(0.3),211.04027(18),195.03015(0.3),180.00664(5),173.06090(0.3),164.98279(2),152.01154(3),117.03396(0.2)

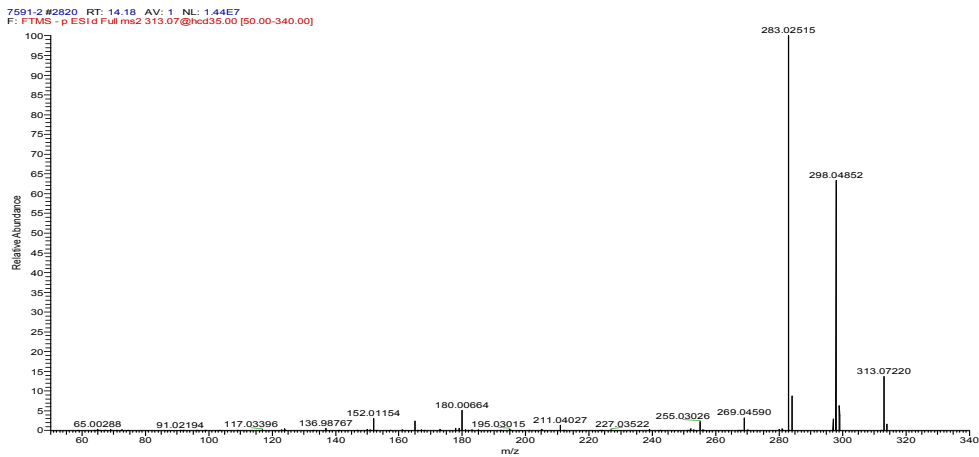

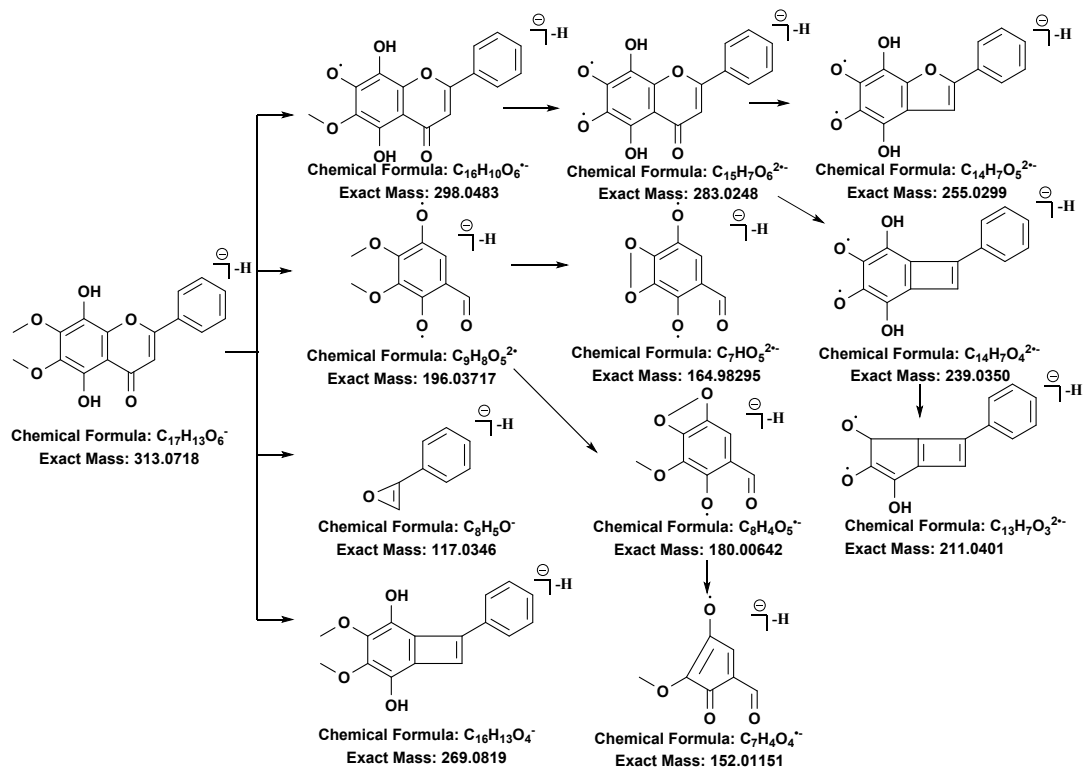

### S63 Skullcapflavone I ( $t_R=13.90$ min)<sup>62</sup>

MS<sup>1</sup>(-):

313.07211

MS<sup>2</sup>(-):

298.04868(68),283.02527(100),255.03012(2),211.04028(2),183.04514(2),173.06091(4),164.98(2),1  
55.05032(3)

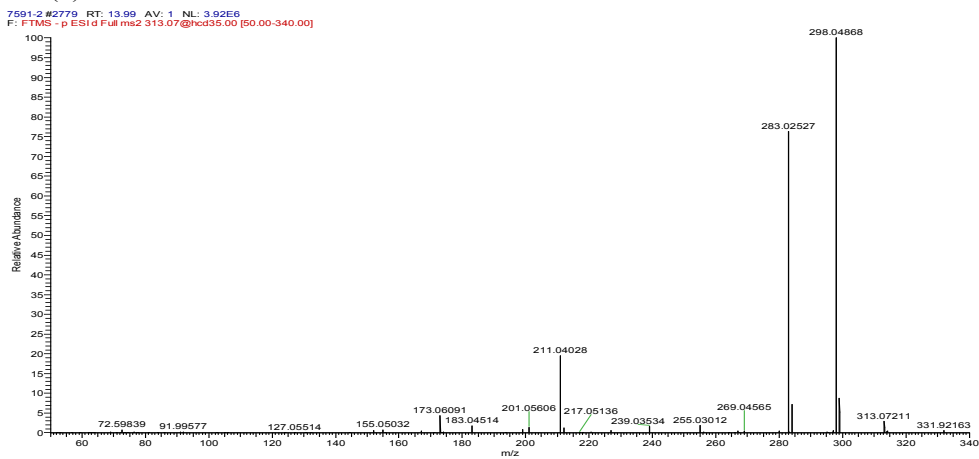

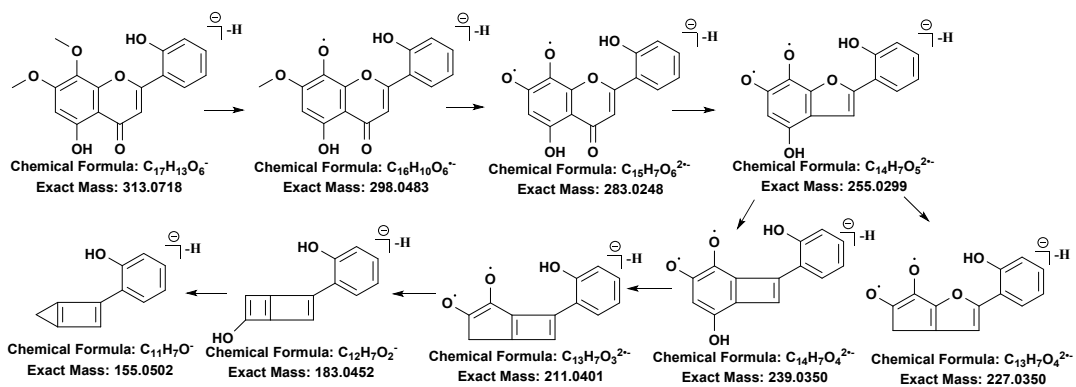

### S69 Isomer of 6-Methoxywogonin (Dihydroxy-dimethoxyflavone) ( $t_R=10.50$ min)<sup>72</sup>

MS<sup>1</sup>(-):

313.07190

MS<sup>2</sup>(-):

298.04874(100), 283.02530(87), 269.04593(21), 255.03079(4), 211.04013(18), 173.06114(3), 145.02940(3), 91.02199(8)

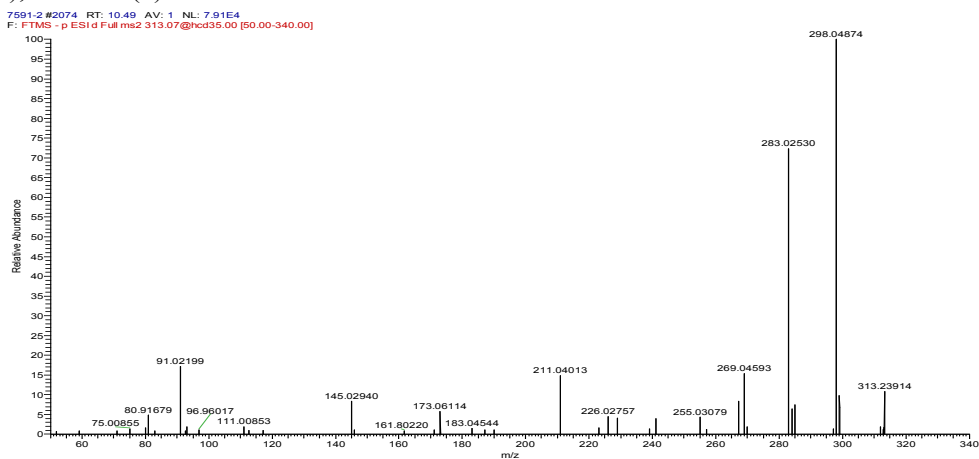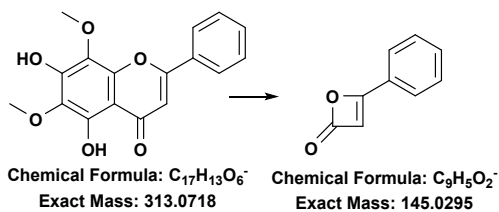



## S56

### 5,7,3,2',6'-Pentahydroxyflavanone ( $t_R=2.89$ min)<sup>61</sup>

MS<sup>1</sup>(-):

303.05117

MS<sup>2</sup>(-):

285.04059(2),241.05075(2),217.05060(9),193.05551(4),177.01930(30),149.02429(10),125.02426

(100)

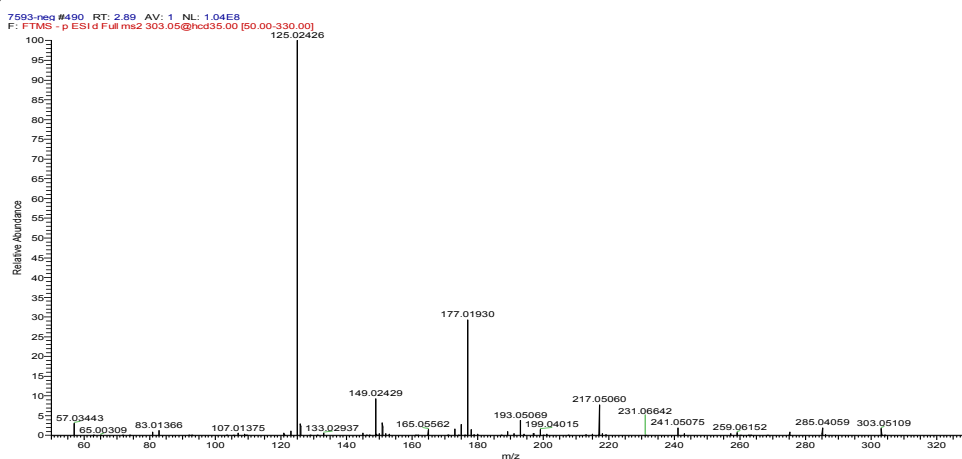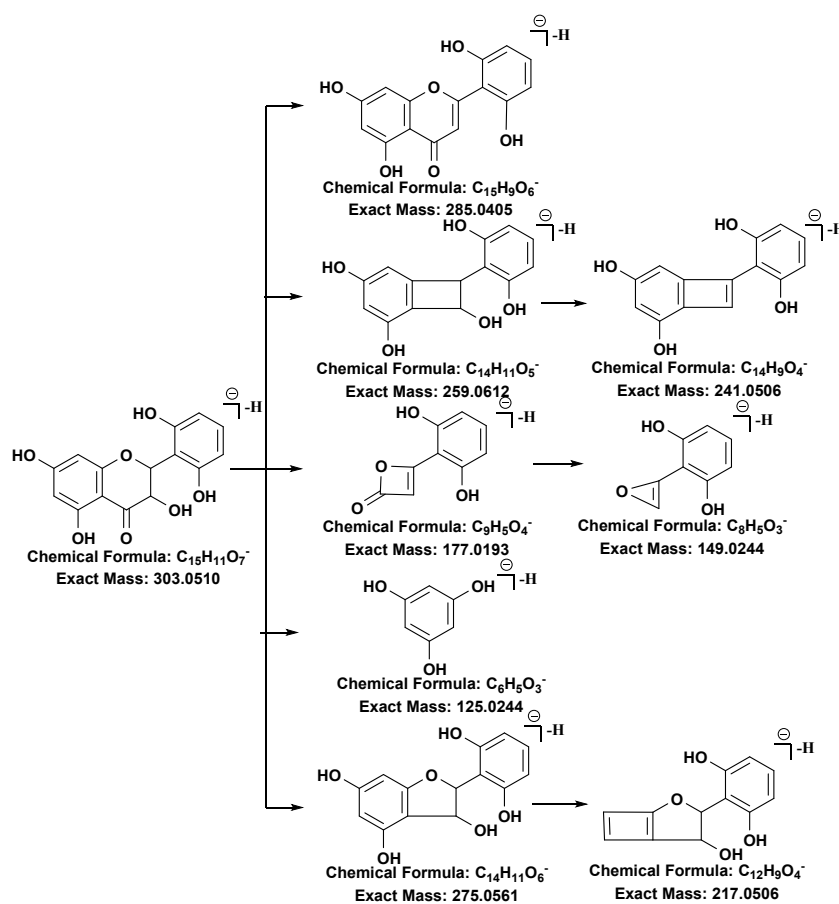

# S60, S62, S68, S74, S79, and S81

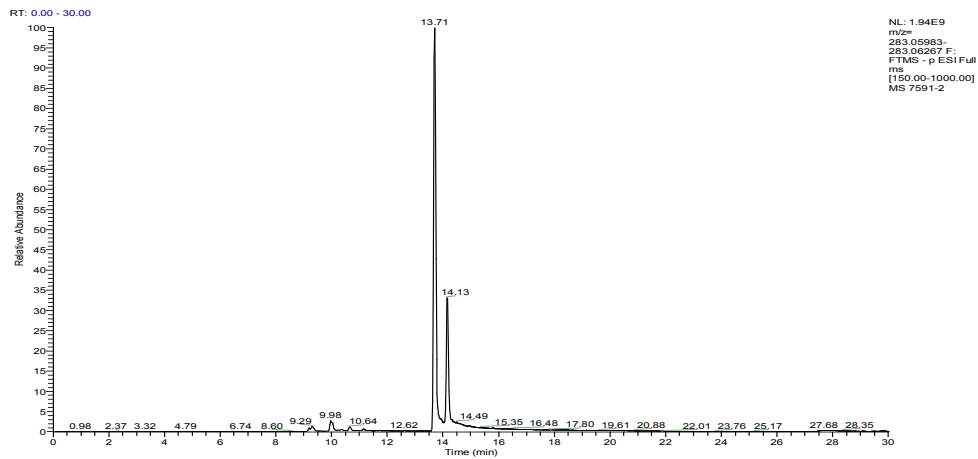

## S60 Wogonin ( $t_R=13.71$ min)

$MS^1(-)$ : 283.06125

$MS^2(-)$ : 268.03809(100), 240.04349(1), 239.03520(1), 224.04802(1), 212.04816(0.3), 211.04041(0.3), 198.03249(1), 196.05321(1), 184.05307(1), 165.99049(1), 163.00372(2), 137.02448(1), 110.00012(0.4)

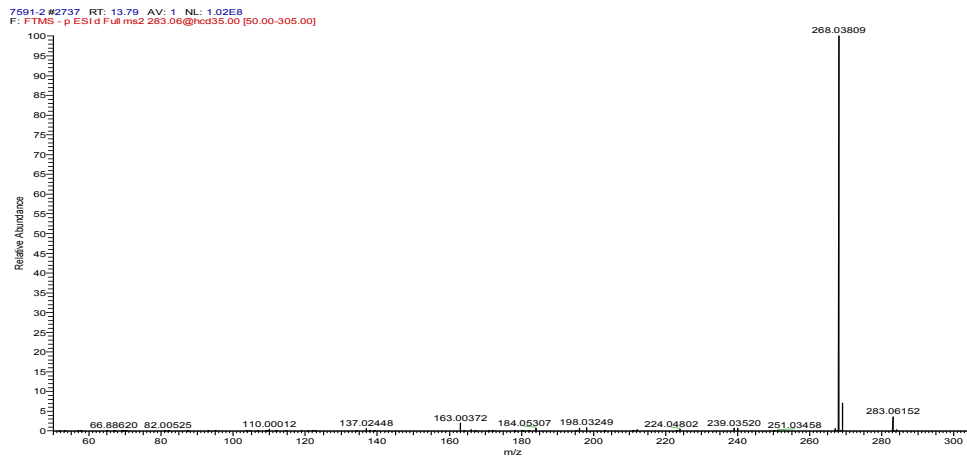

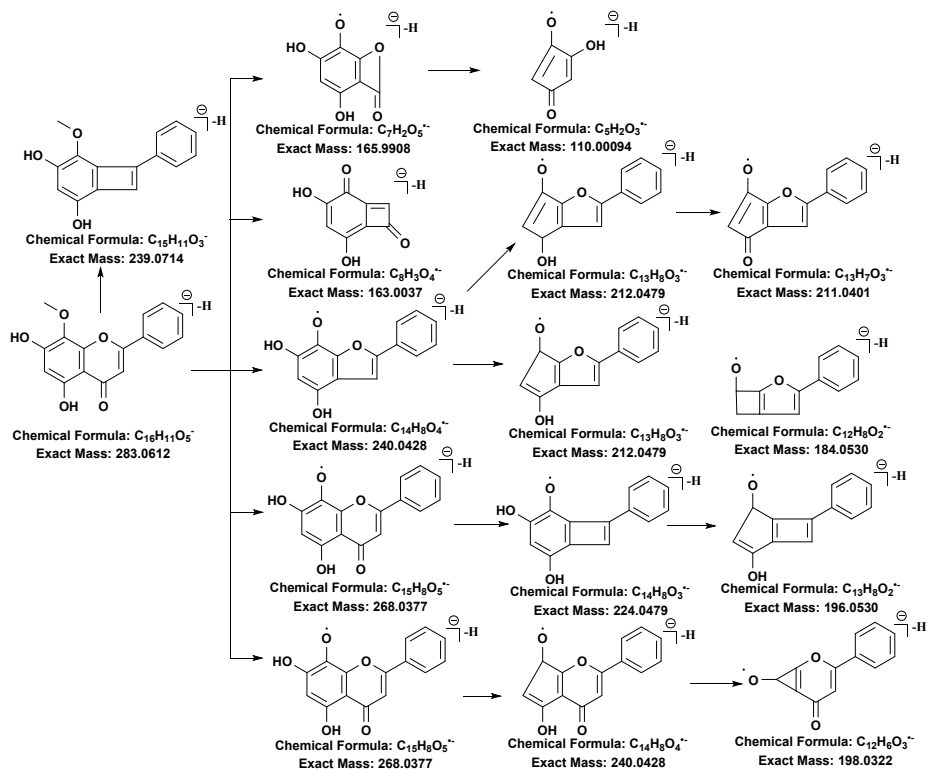

### S62 Oroxylin A ( $t_R=13.91$ min)

$MS^1(-)$ :

283.06129

$MS^2(-)$ :

268.03809(100),240.04308(0.4),239.03503(0.7),224.04767(0.4),212.04845(0.4),211.03987(0.2),198.03233(1),196.05310(1),184.05318(1),165.99036(0.3),163.00372(2),137.02437(0.6),110.00023(0.4)

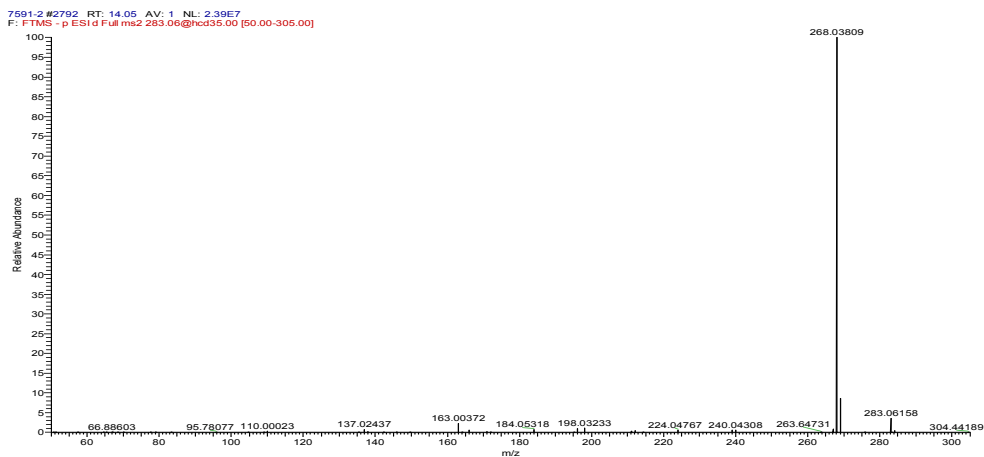

### S68 Isomer of S60 (Dihydroxy-methoxyflavone) ( $t_R=14.75$ min)

$MS^1(-)$ :

283.06122

$MS^2(-)$ :

268.03796(100),240.04321(1),239.03526(1),224.04819(0.4),212.04845(0.4),211.04047(0.6),198.03242(0.6),196.05336(0.4),184.05302(0.6),171.04515(0.2),165.99080(0.5),137.02440(0.4)

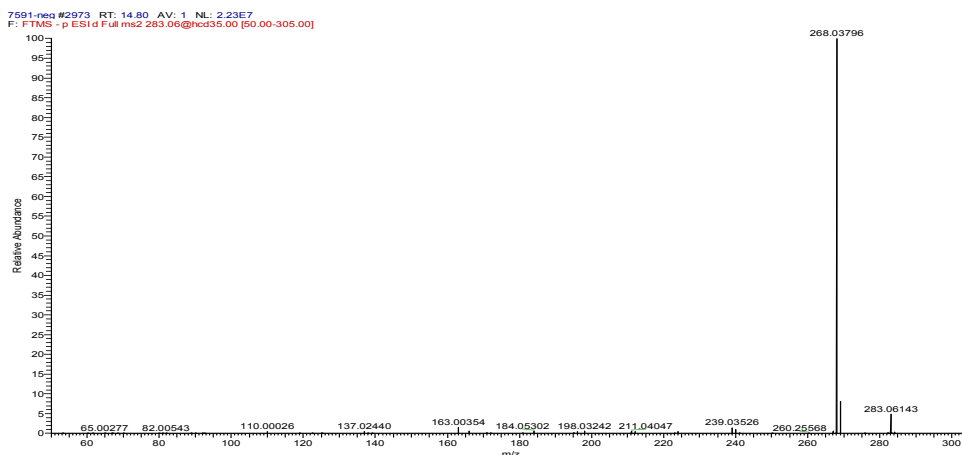

**S74 Isomer of S60 (Dihydroxy-methoxyflavone) ( $t_R=10.27$  min)**

MS<sup>1</sup>(-):283.06137

MS<sup>2</sup>(-):

268.03815(100),255.03041(1),239.03531(1),224.04813(1),211.04037(1),198.03255(1),196.05328(1),184.05304(1),183.04530(0.3),173.06088(1),163.00375(2),137.02452(1),110.00090(0.3)

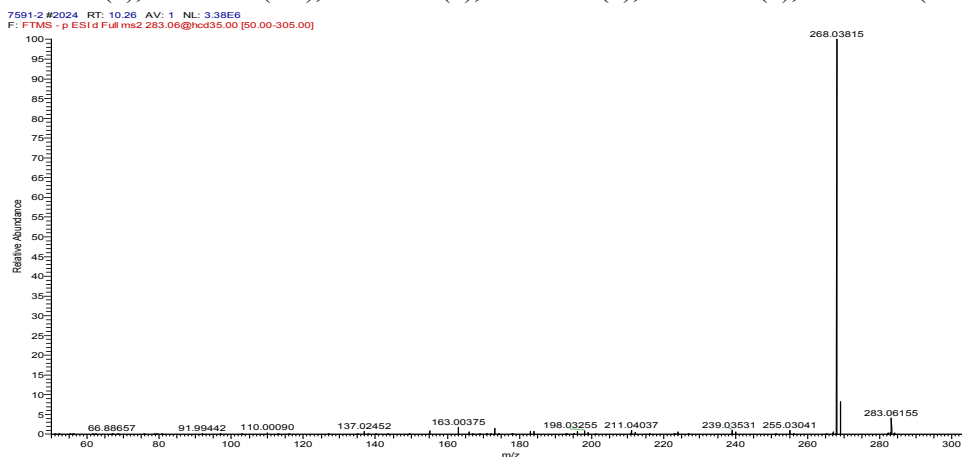

**S79 Isomer of S60 (Dihydroxy-methoxyflavone) ( $t_R=10.53$  min)**

MS<sup>1</sup>:

283.06165

MS<sup>2</sup>:

268.03815(100),255.03064(0.1),224.04797(1),212.04796(0.3),211.04030(1),198.03264(1),196.05330(1),184.05304(1),165.99068(0.4),163.00375(2),137.02444(1),110.00021(0.3)

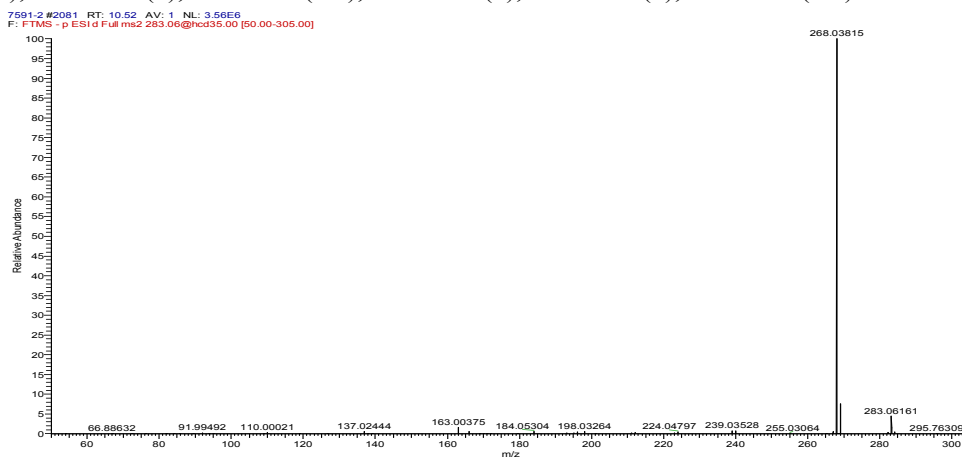

**S81 Isomer of S60 (Dihydroxy-methoxyflavone) ( $t_R=11.09$  min)**

MS<sup>1</sup>(-):

283.06149

MS<sup>2</sup>(-):

268.04(100),255.03041(0.2),224.04813(0.5),212.04037(0.4),211.04037(0.2),198.03255(1),196.05  
328(1),184.05(1),165.99072(1),163.00375(2),137.02438(1),110.00014(0.4)

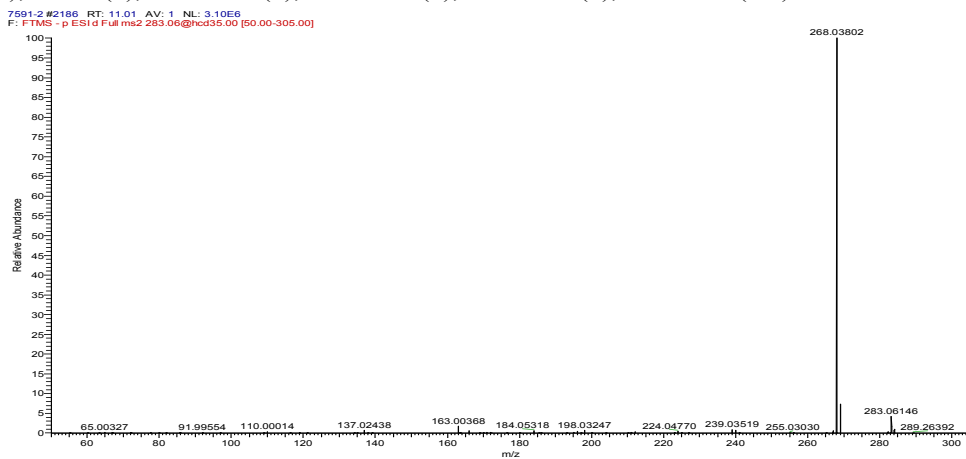

## S64, S71

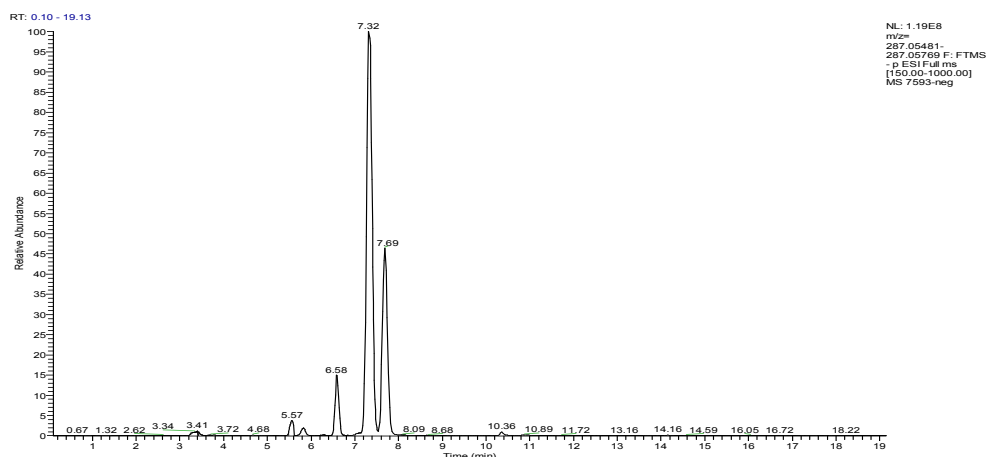

### S64 Isomer of S71 (Tetrahydroxyflavanone) ( $t_R=7.67$ min)

MS<sup>1</sup>(-):

287.05625

MS<sup>2</sup>(-):

287.05701(4), 269.04599(3), 225.05568(1), 215.03513(9), 201.05588(9), 177.06(2), 173.06(1), 161.02443(17), 151.00369(3), 133.02956(4), 125.02438(100)

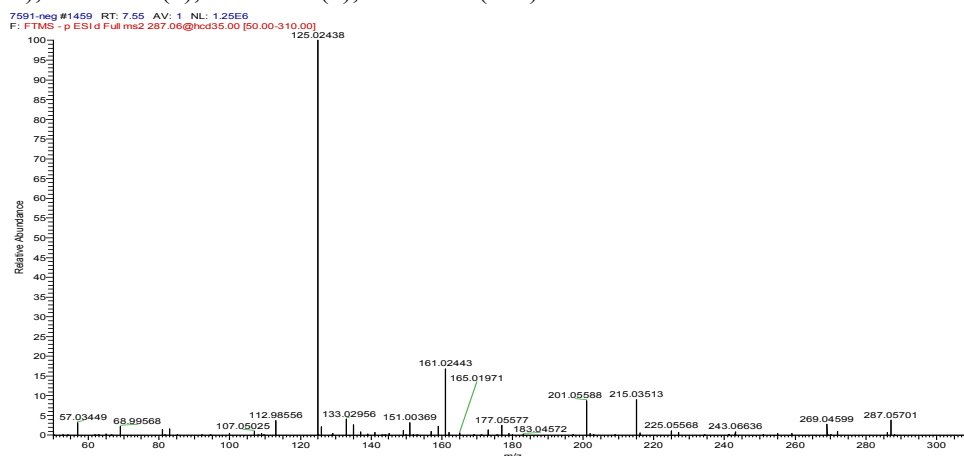

### S71 Eriodictyol ( $t_R=7.24$ min)<sup>62, 73</sup>

MS<sup>1</sup>(-):

287.05622

MS<sup>2</sup>(-):

269.04581(0.6), 243.06630(0.1), 225.05594(0.1), 179.0350(0.1), 161.02428(25), 151.00359(1), 135.04514(2), 125.02432(100)

7591-neq #1395 RT: 7.24 AV: 1 NL: 1.88E7  
 F: FTMS - p ESI d Full ms2 287.06@ncd35.00 [50.00-310.00]

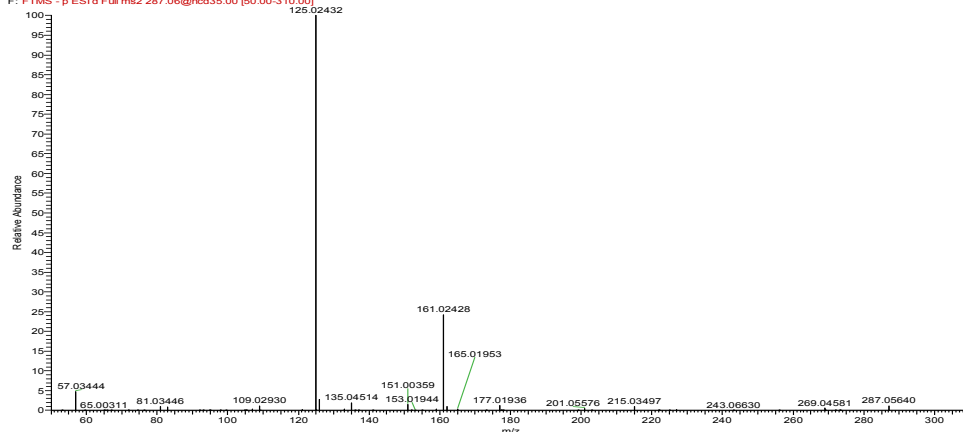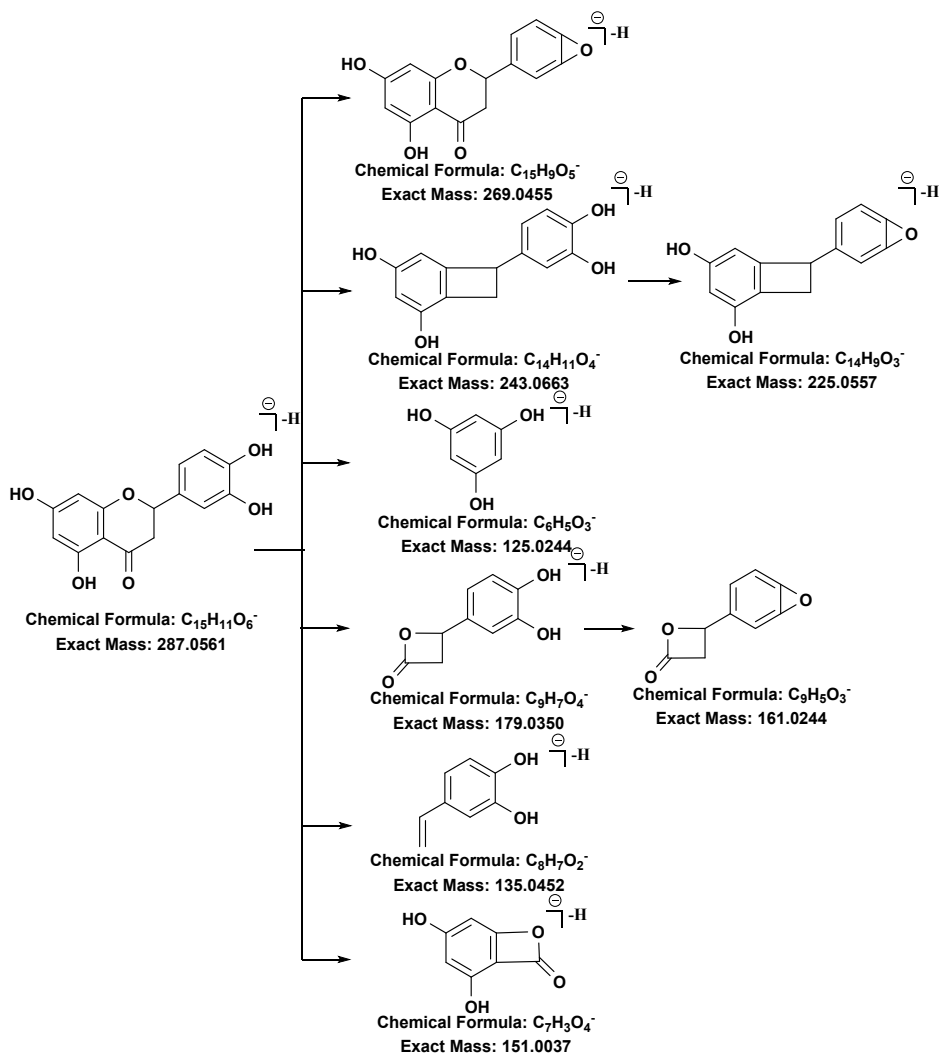

## S65, S73, and S76

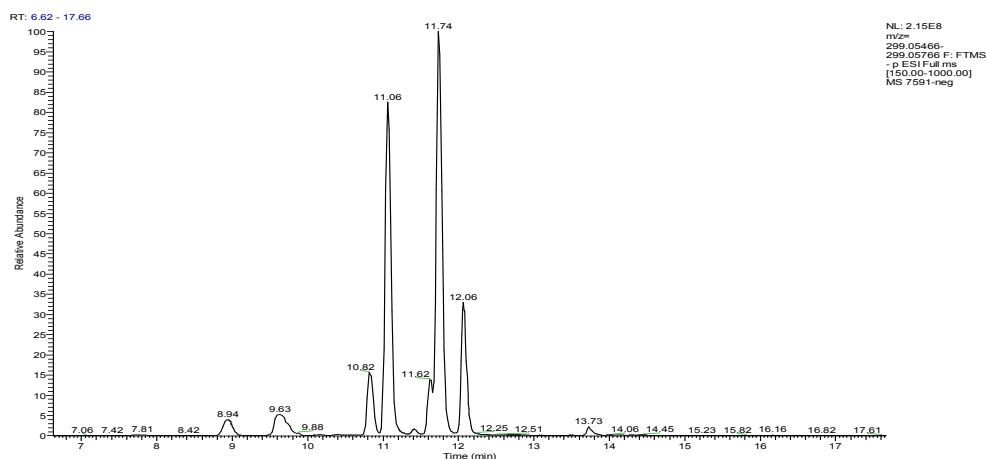

### S65 Trihydroxy-methoxyflavone ( $t_R=12.06$ min)

MS<sup>1</sup>(-):

299.05618

MS<sup>2</sup>(-):

284.03296(100), 256.03872(2), 255.03044(0.2), 227.03548(0.1), 200.04811(2), 165.99077(8), 137.99599(4), 110.00093

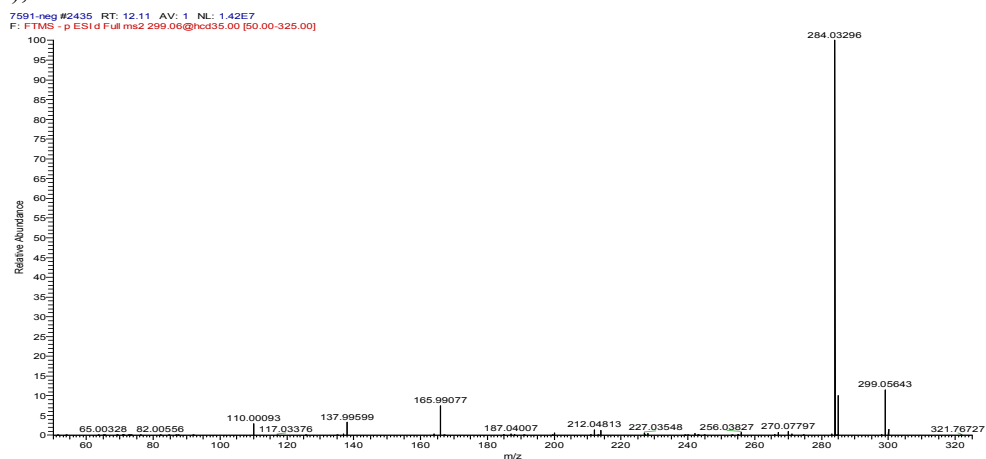

### S73 5,6,7-Trihydroxy-8-methoxyflavone OR isomer (trihydroxy and methoxy on A ring) ( $t_R=11.61$ min)

MS<sup>1</sup>(-):

299.05616

MS<sup>2</sup>(-):

299.06(100), 284.03290(49), 267.03012(11), 255.06651(24), 240.04300(12), 231.07(7), 227.07092(0.5), 212.04813(4), 153.01930(0.2), 151.00368(82), 107.01389(8)



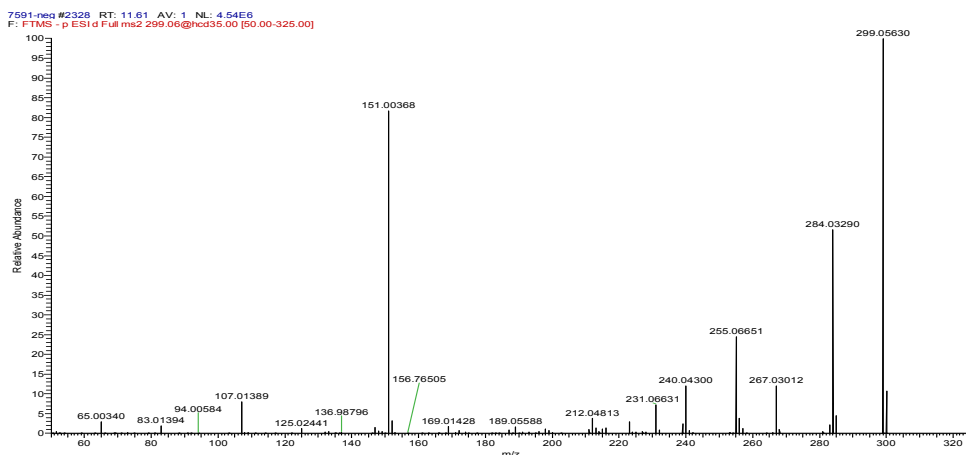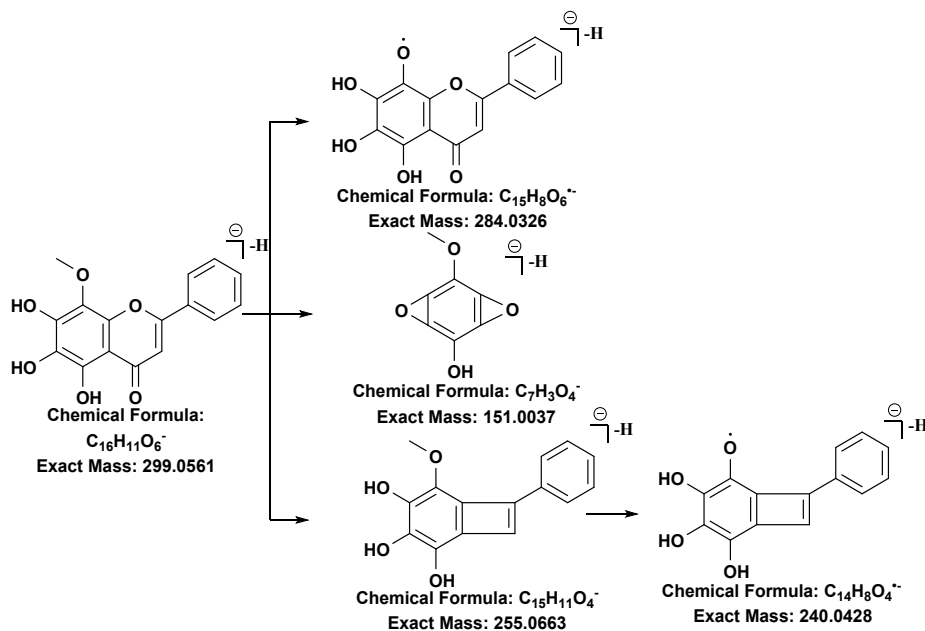

**S76 4'-hydroxy wogonin ( $t_R=10.72$  min)**

MS<sup>1</sup>(-):

299.05611

MS<sup>2</sup>(-):

284.03275(100),271.06204(6),255.06720(2),227.07127(9),212.04810(12),211.03995(17),183.02997(2),165.01932(6),153.01926(36),133.02950(20)

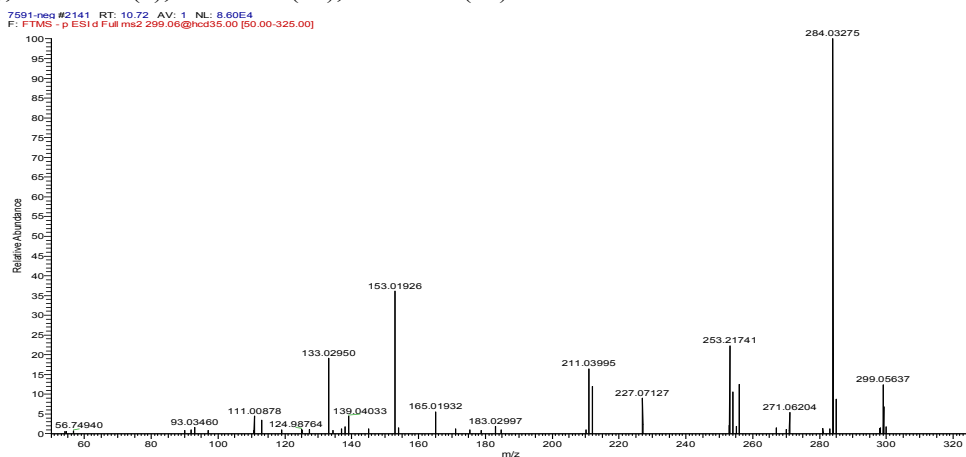

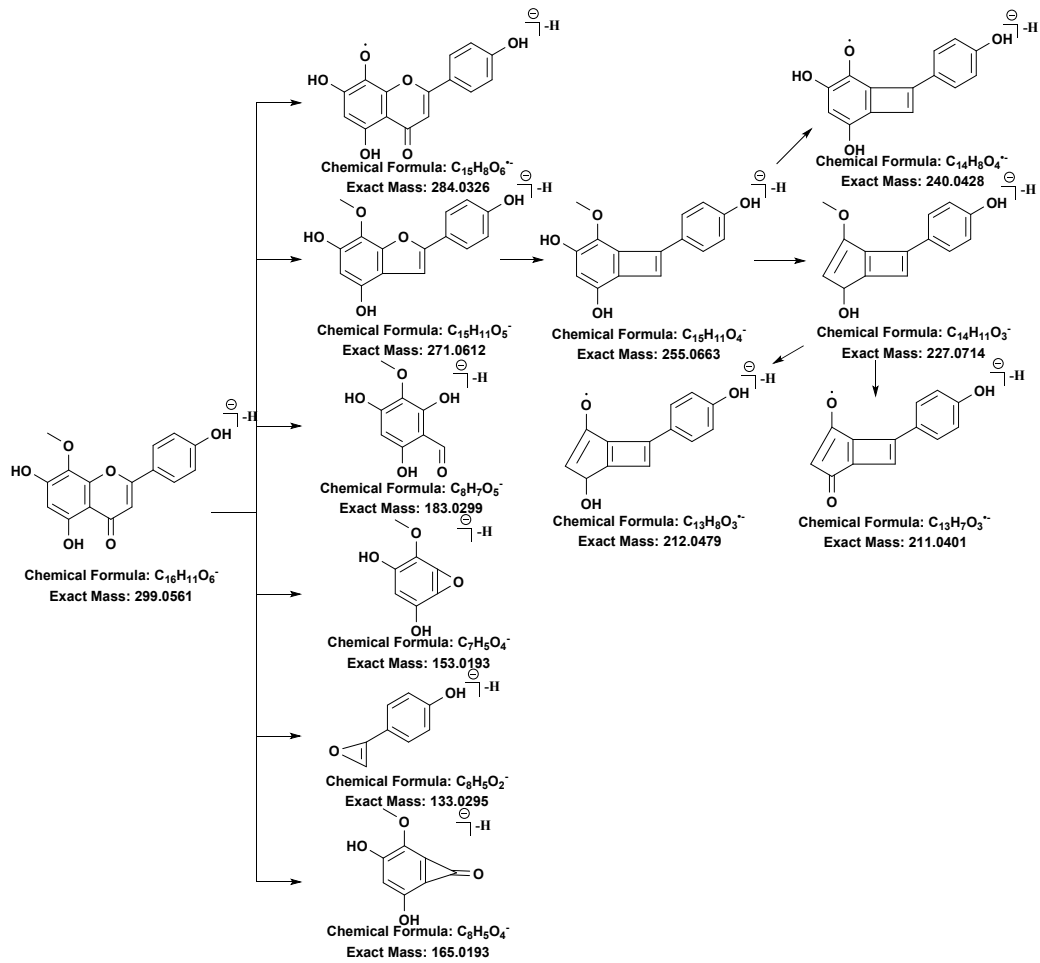

Scullcapflavone II ( $t_R=14.50$  min)<sup>61</sup>MS<sup>1</sup>(-):

373.09289

MS<sup>2</sup>(-):

358.06985(22),343.04617(100),328.02286(23),325.03555(2),315.05099(1),313.03574(0.6),300.02

783(5),285.00458(1),227.03514(4),194.99355(6),169.01425(3),133.02936(1)

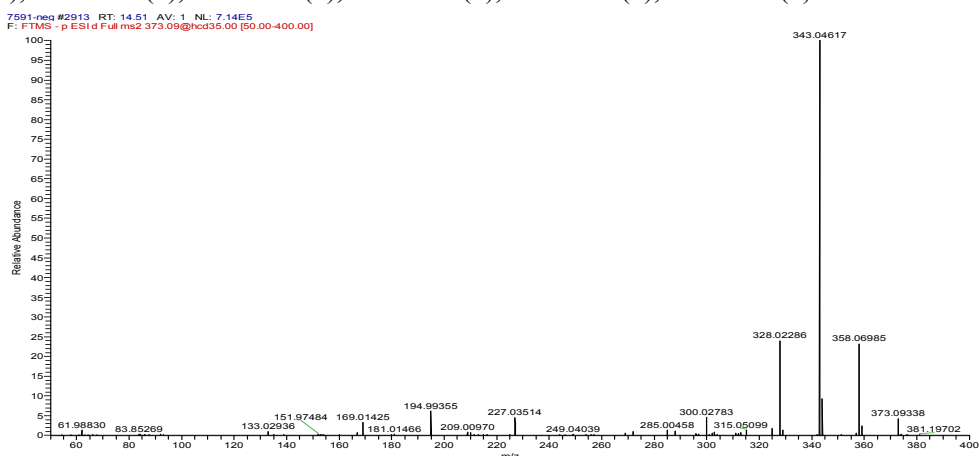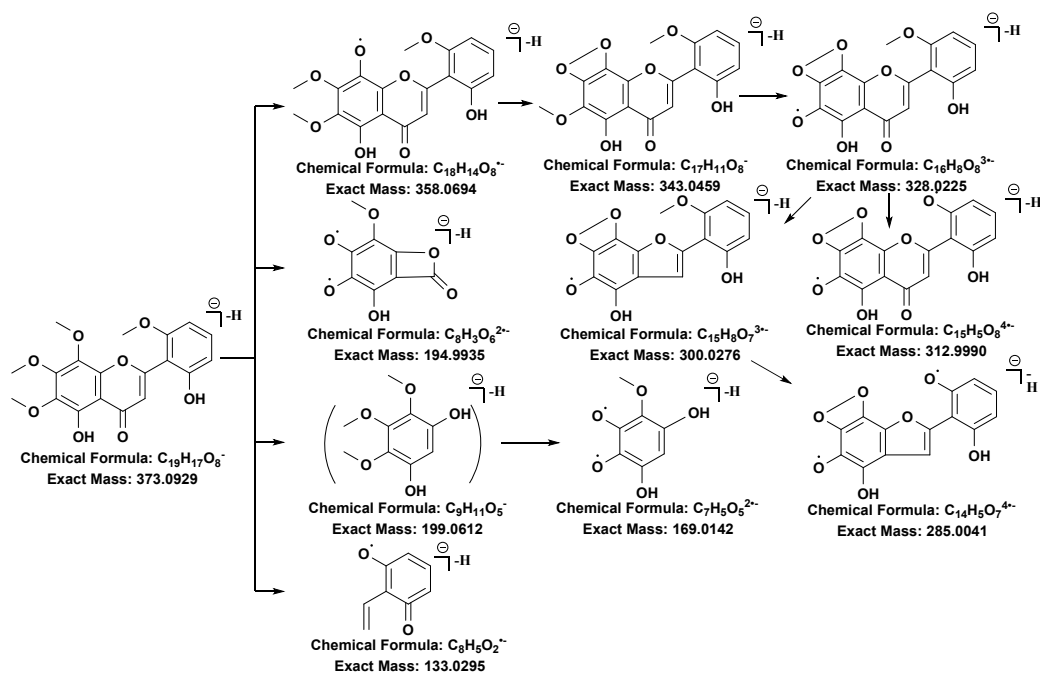

**8,8'-Biapigenin ( $t_R=13.67$  min)<sup>62</sup>**MS<sup>1</sup>(-):

537.08295

MS<sup>2</sup>(-):391.04648(76),373.03580(10),347.05630(16),335.05679(5),319.06134(7),291.06656(2),2  
45.00926(100),239.03531(1),217.01433(3)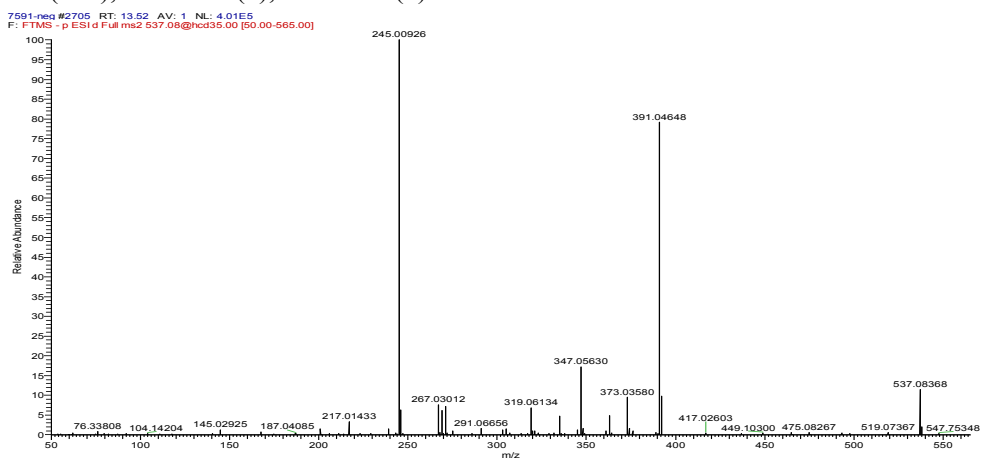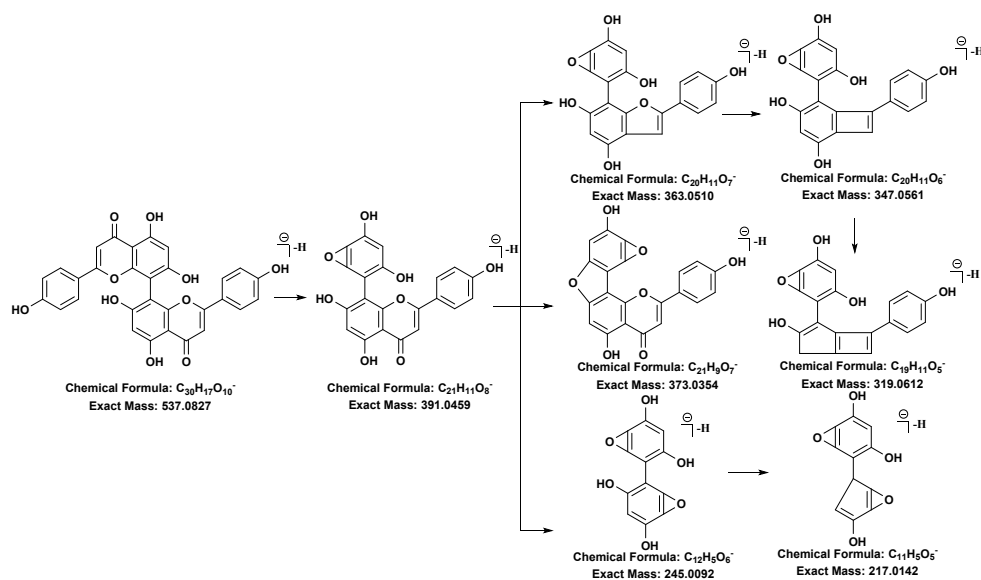

**Baicalein 6-O-sulfate ( $t_R=9.29$  min)<sup>70</sup>**MS<sup>1</sup>(-):

349.00236

MS<sup>2</sup>(-):

269.04593(100),241.05110(0.3),225.05605(1),225.05605(0.9),197.06(1),181.06602(0.2),139.00328(0.1)

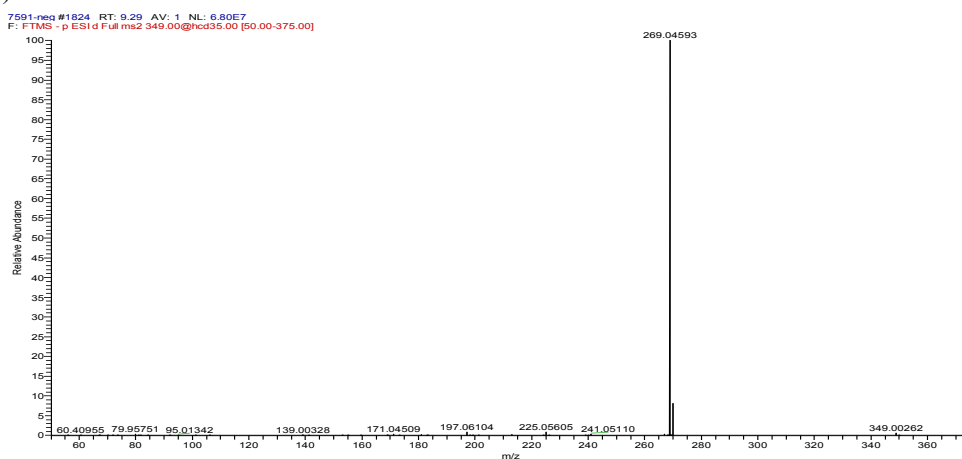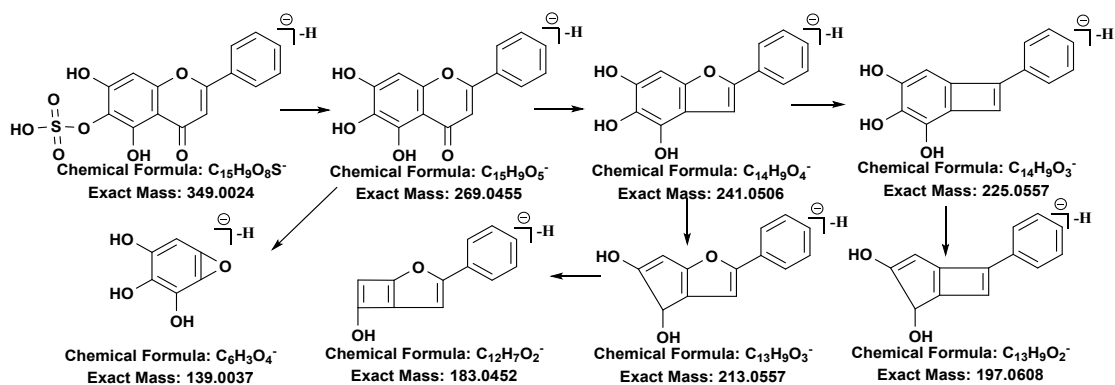

# S75

**Tenaxin I** ( $t_R=14.60$  min)<sup>61</sup>

MS<sup>1</sup>(+):

345.09647

MS<sup>2</sup>(+):

345.09631(100), 330.07288(34), 315.04938(92), 312.06241(18), 297.03891(31)

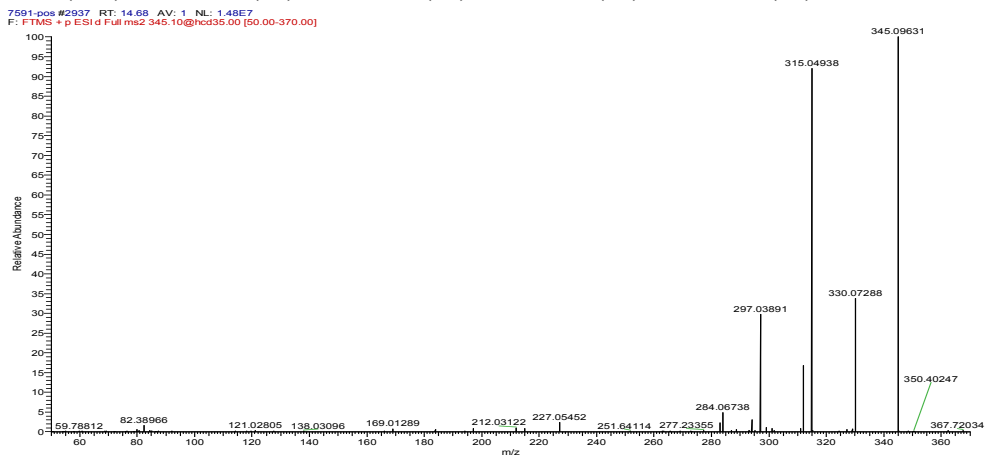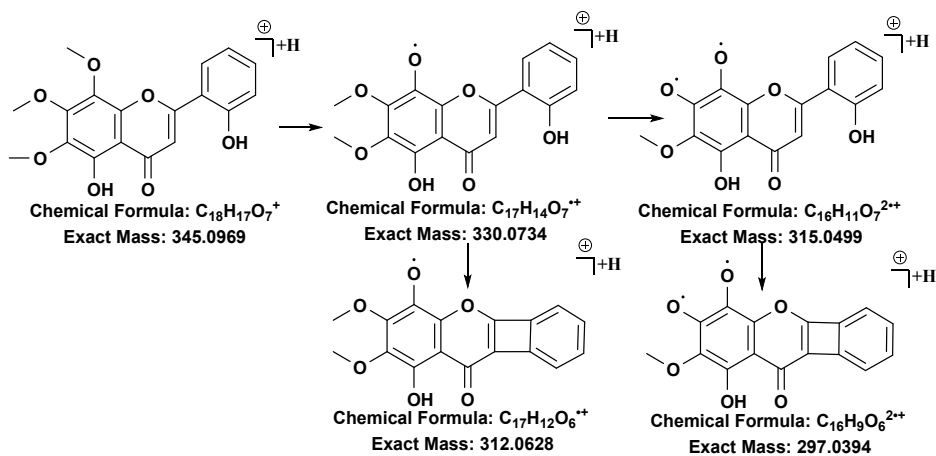

Neptin ( $t_R=10.47$  min)<sup>72</sup>MS<sup>1</sup>(-):

315.05119

MS<sup>2</sup>(-):

300.06476(69),284.02829(19),253.01425(30),227.03526(100),212.04431(7),165.99086(58),137.9

9605(11),110.00083(9)

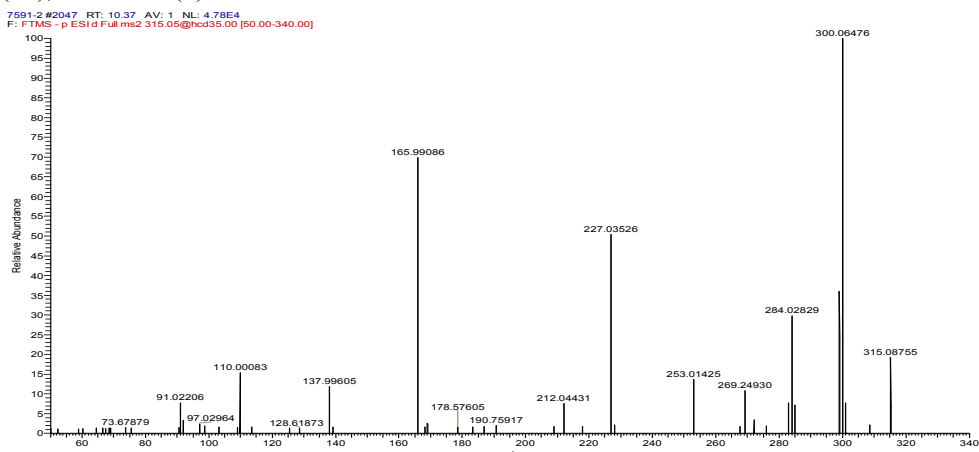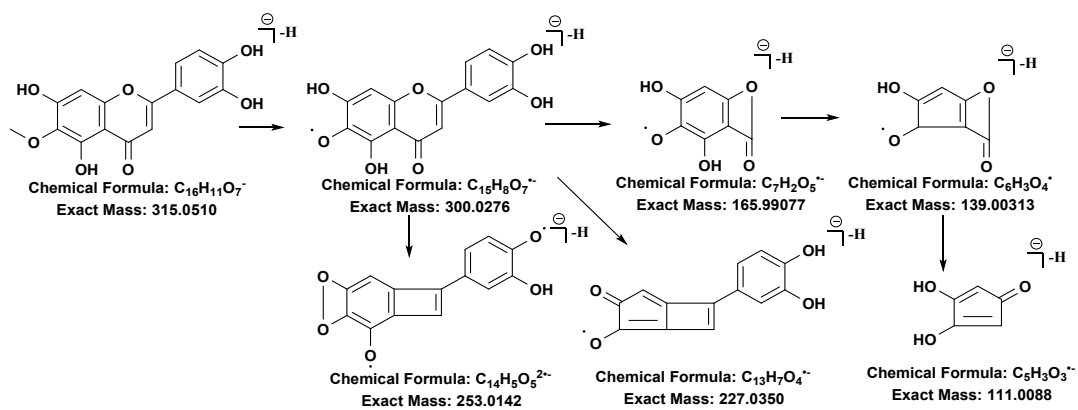

## S80

**Trihydroxy-methoxyflavanone (dihydroxy and methoxy on A ring, monhydroxy on B ring)**  
**( $t_R=10.65$  min)**

$MS^1(-)$ :

301.07175

$MS^2(-)$ :

286.04865(100), 283.02444(4), 268.03766(0), 255.23323(10), 185.06107(5), 180.00667(16), 165.99078(8), 152.01132(5), 137.99594(9), 119.05031(8)

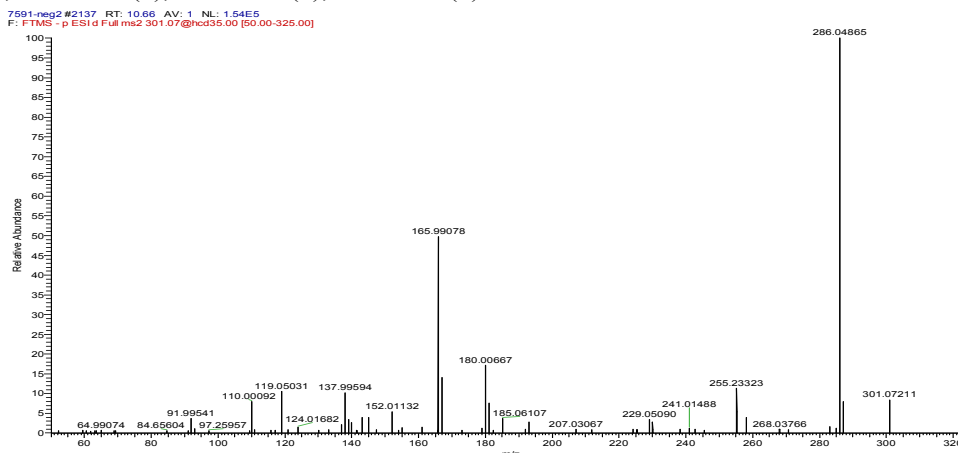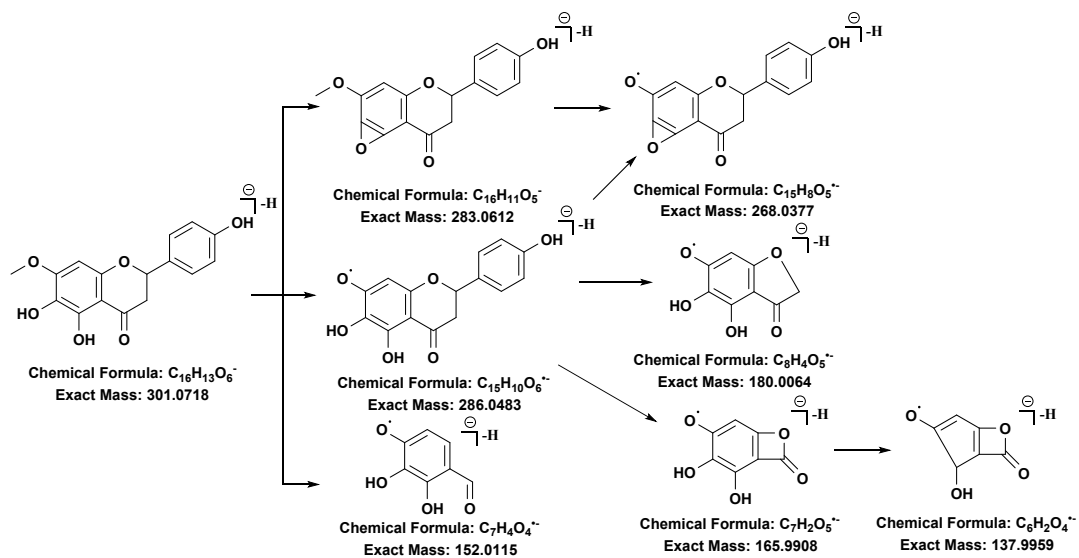



## S83, S84

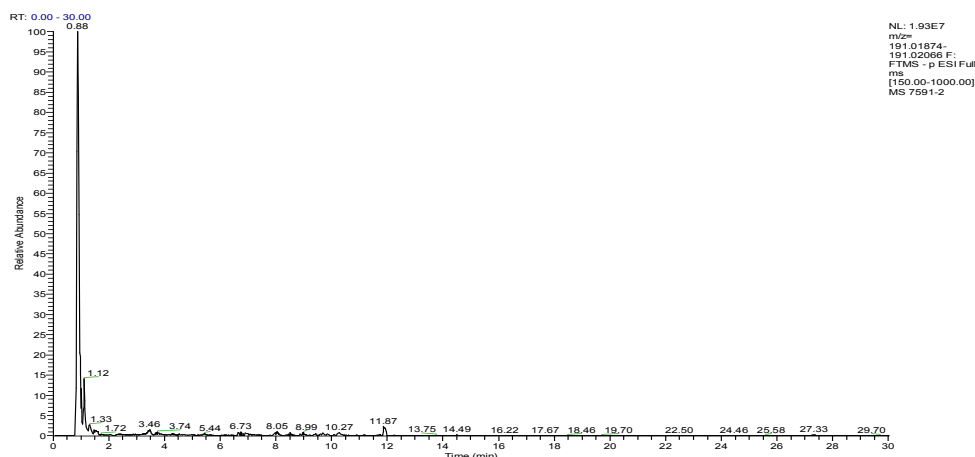

### S83 D-Galactaric acid, 1,5-lactone OR isomer ( $t_R=0.81$ min)

MS<sup>1</sup>(-):

191.01970

MS<sup>2</sup>(-):

173.00926(3), 147.03001(1), 129.01953(8), 111.00883(4), 103.00378(4), 85.03(100), 72.99311(10)

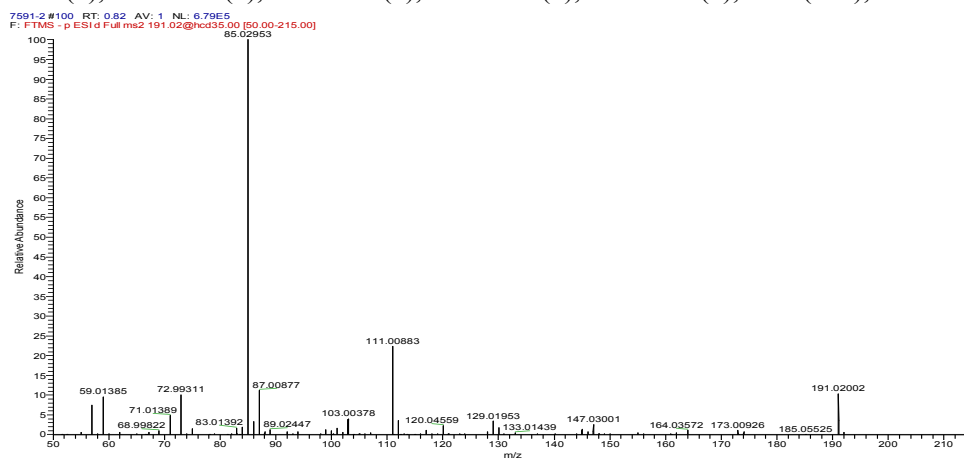

### S84 Isomer of D-Galactaric acid, 1,5-lactone ( $t_R=1.04$ min)

MS<sup>1</sup>(-):

191.01969

MS<sup>2</sup>(-):

173.00949(4), 129.01956(8), 117.01949(2), 111.00882(100), 87.00871(42), 85.02947(34)

7591-2#149 RT: 1.04 AV: 1 NL: 5.59E5  
 F: FTMS -p ESId Full ms2 191.02@ncd35.00 [50.00-215.00]

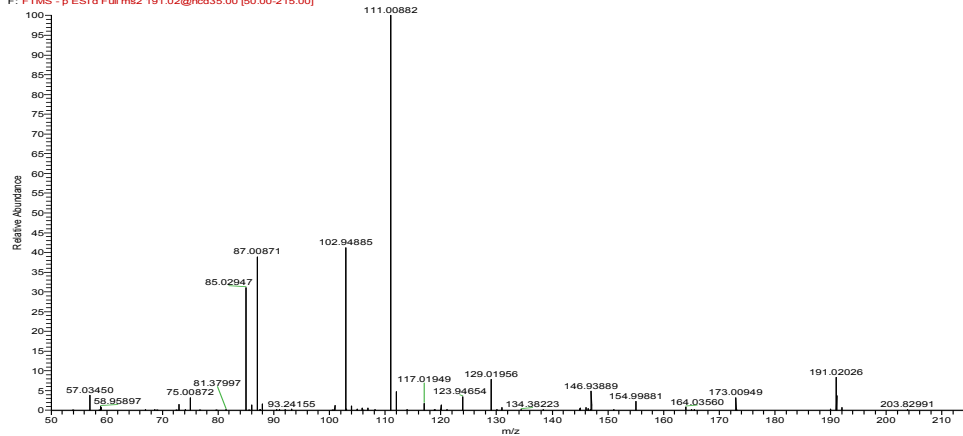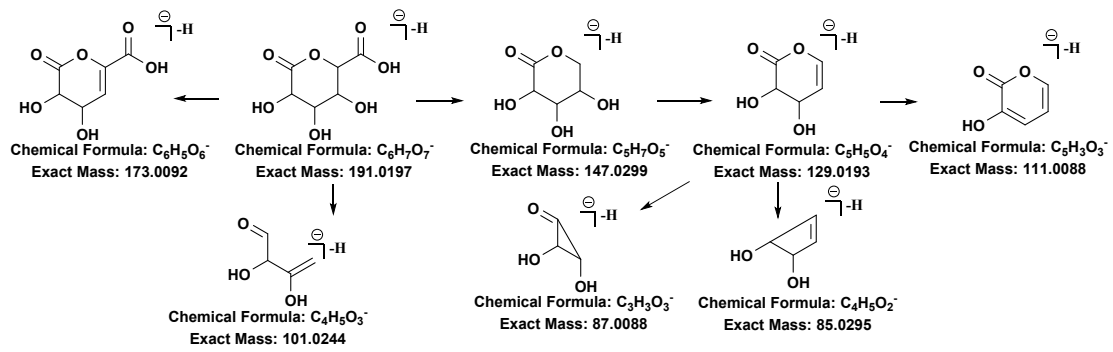

# S85

1-caFFEyllaminaribiose ( $t_R=1.29$  min)<sup>74</sup>

MS<sup>1</sup>(-):

503.14106

MS<sup>2</sup>(-):

341.08823(2),323.07770(13),281.06732(20),251.05649(10),223.97(2),221.04567(14),179.03532(44),161.02457(100),135.04533(12)

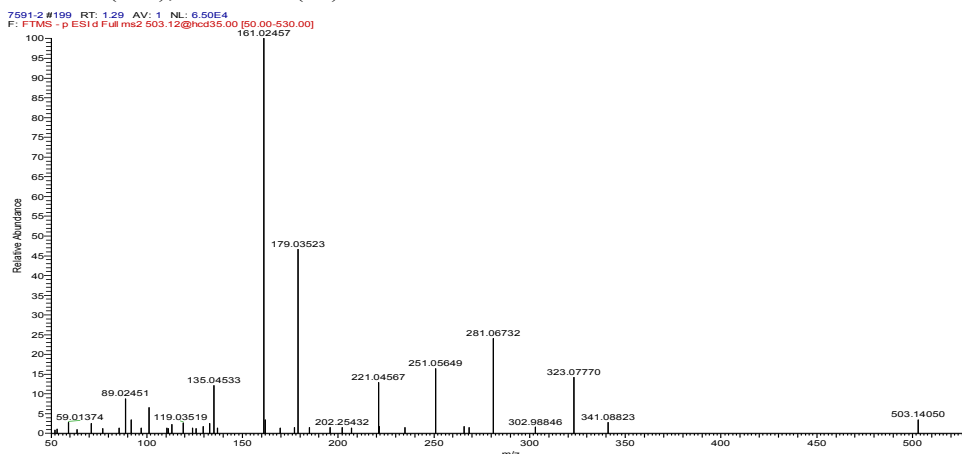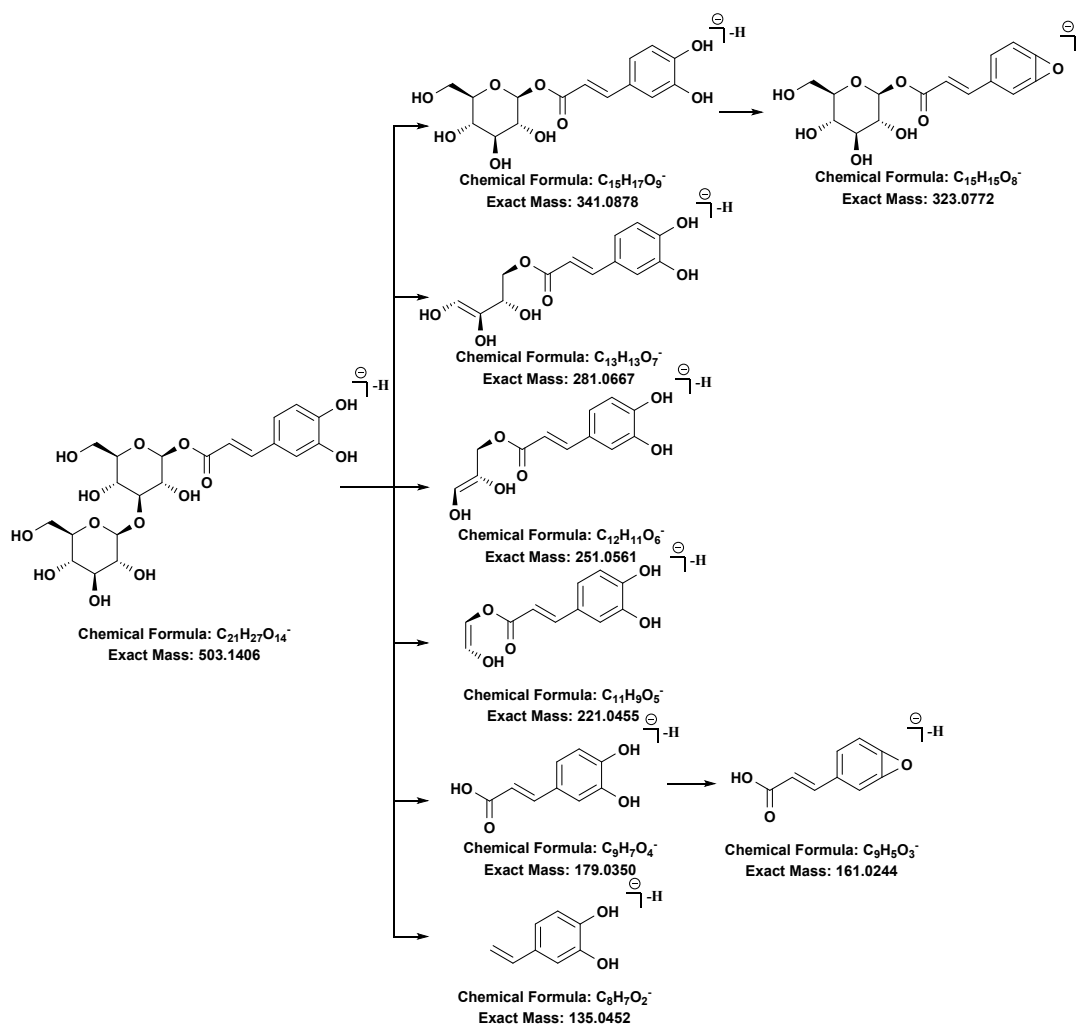

Gaylussacin ( $t_R=8.29$  min)<sup>75</sup>

MS<sup>1</sup>(-):

417.11947

MS<sup>2</sup>(-):

255.06686(10),211.07681(100),197.06166(0.2),169.06604(5),112.98558(2)

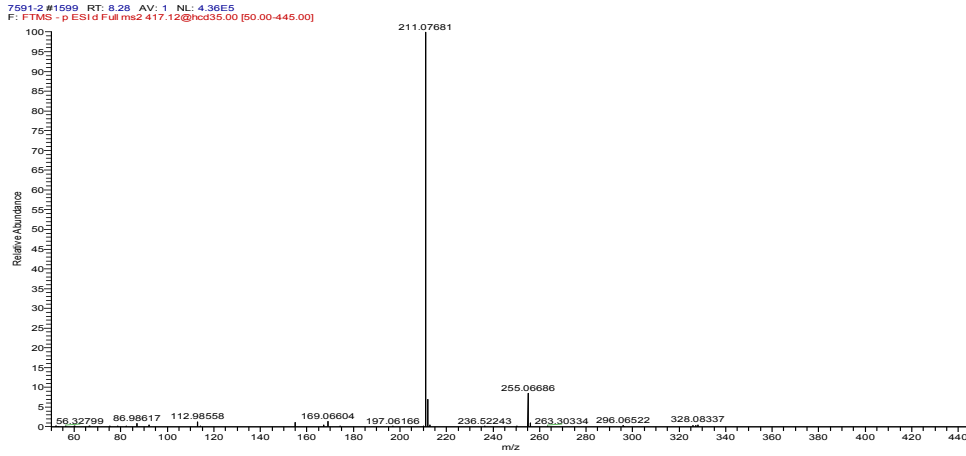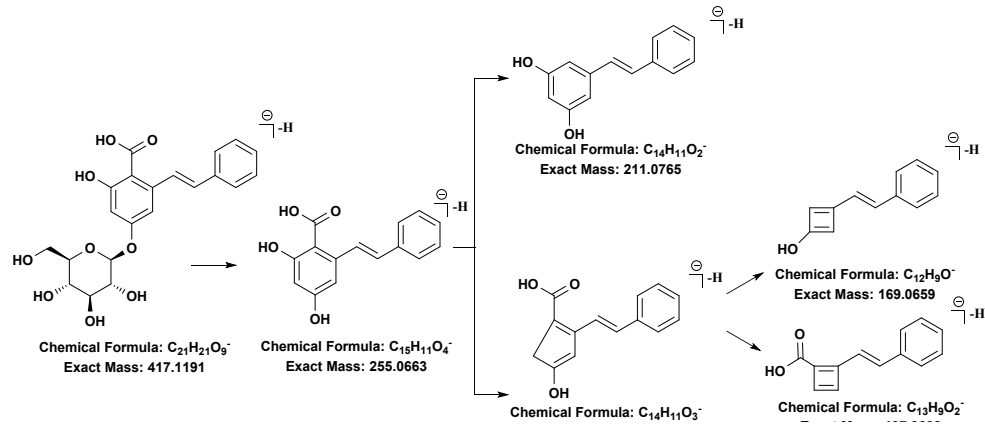

## S87

Isomer of Hexadecanoic acid ( $t_R=22.48$  min)<sup>76</sup>

MS<sup>1</sup>(-):255.23276

MS<sup>2</sup>(-):255.23302(100),237.22174(0.2),211.20708(0.2)

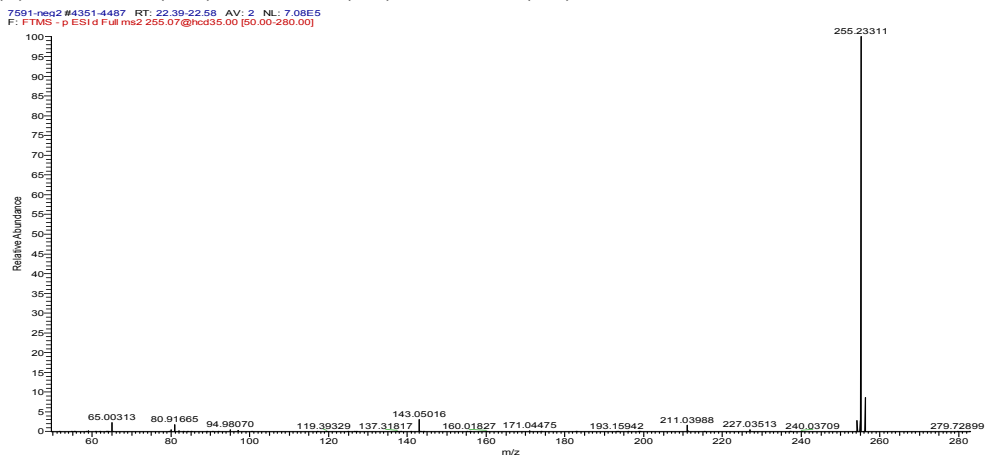

## S88

Isomer of 10-Hydroxyoctadecadienoic acid ( $t_R=17.94$  min)

MS<sup>1</sup>(-):

295.22773

MS<sup>2</sup>(-):

277.21747(25),211.13409(1),195.13907(2),183.13905(100)

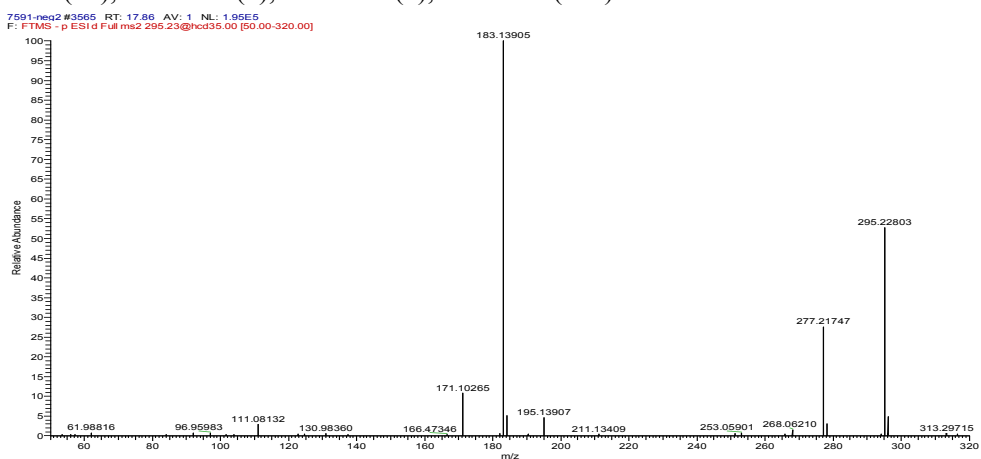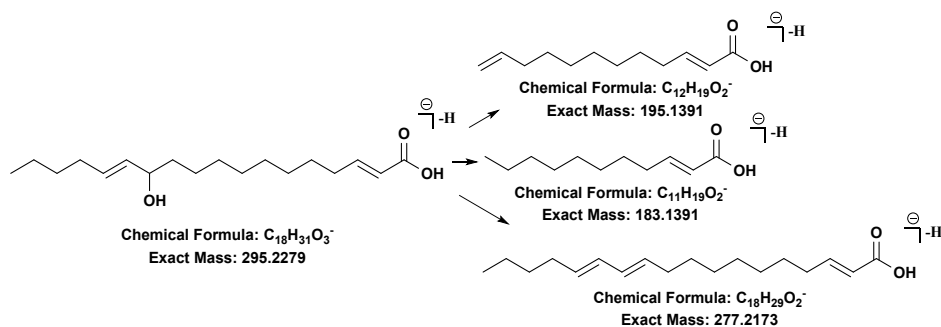

## S89

Isomer of 3-Hydroxy-4-*O*-glucosylbenzyl alcohol ( $t_R=6.12$  min)

MS<sup>1</sup>(-):

301.03561

MS<sup>2</sup>(-):

161.02446(23),139.04013(100),135.04533(22),133.00966(16),124.01660(11),107.05027(10)

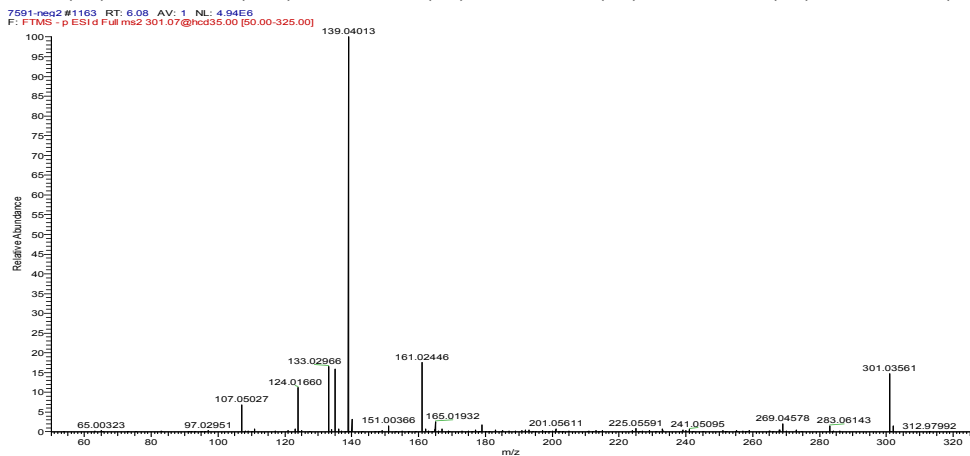

## S90

Isomer of Linoleoyl Ethanolamide (LEA) ( $t_R=19.97$  min)

MS<sup>1</sup>(-):

324.12268 (positive)

MS<sup>2</sup>(-):

306.27869(6),219.05690(6),147.11668(2),123.11678(5),109.10135(7),95.08574(14),81.07028(17),6  
2.06064(100)

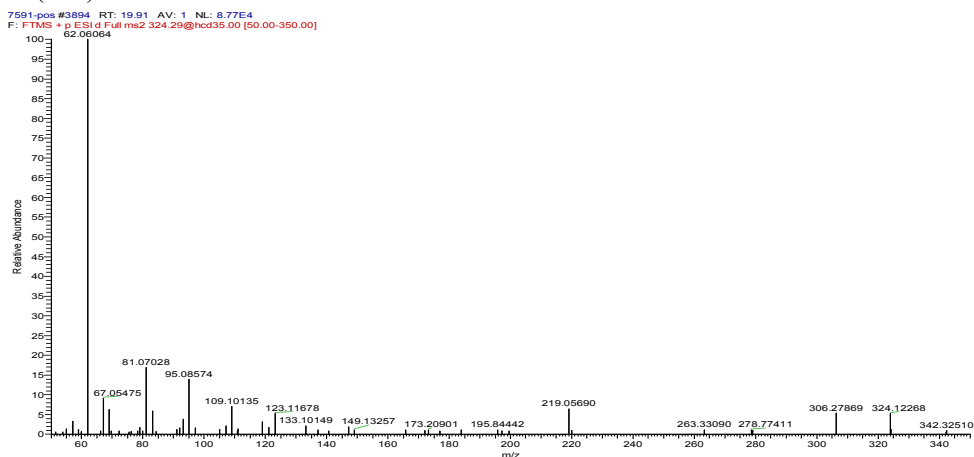

# S91

Isomer of 5-O- $\beta$ -D-glucopyranosyl-6-hydroxyangelicin ( $t_R=0.87$  min)<sup>77</sup>

MS<sup>1</sup>(+):

381.07891

MS<sup>2</sup>(+):

381.08(100),219.02664(30),201.01584(25)

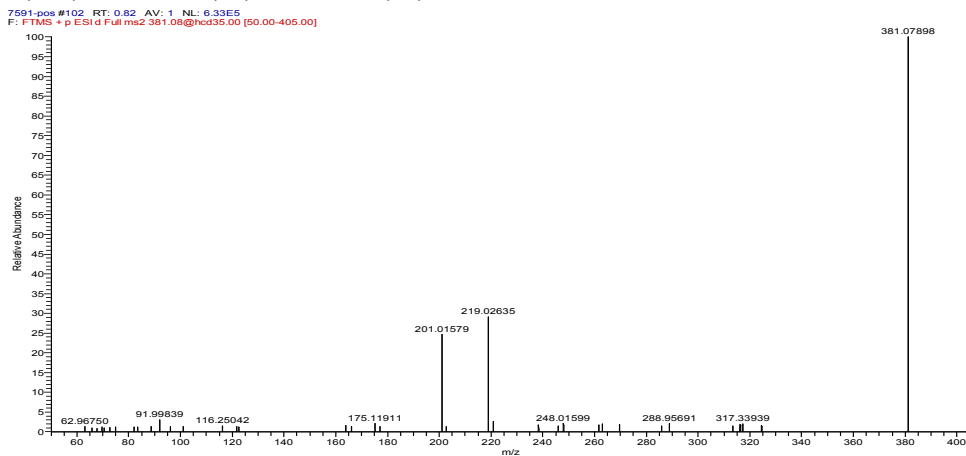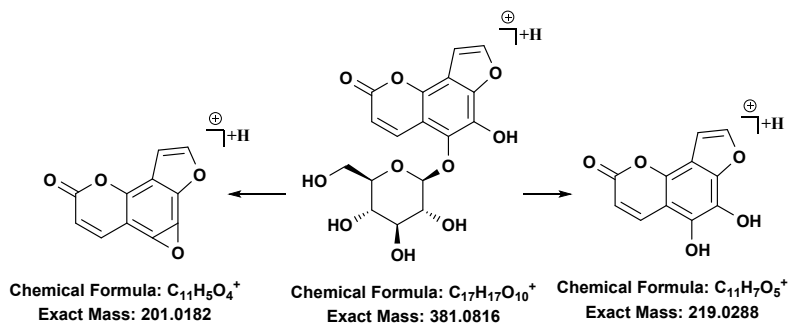

**3,4-Dihydroxy-7-*O*-caffeoylbenzyl alcohol OR isomer ( $t_R=6.17$  min)<sup>78</sup>**MS<sup>1</sup>(+):

303.08598

MS<sup>2</sup>(+):

285.07507(15),267.06482(1),257.08026(32),242.05684(8),229.08551(57),179.03380(2),167.0336

3(100),163.03865(3),133.02831(24),123.04404(69),107.04928(44)

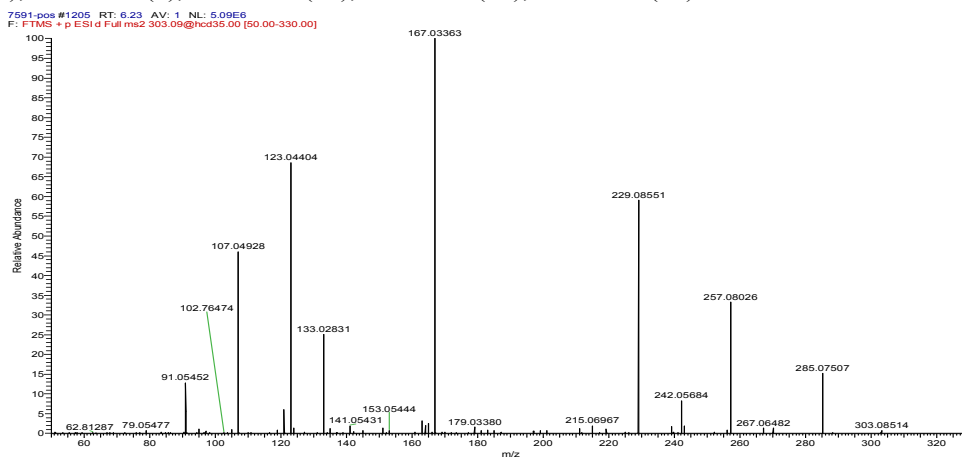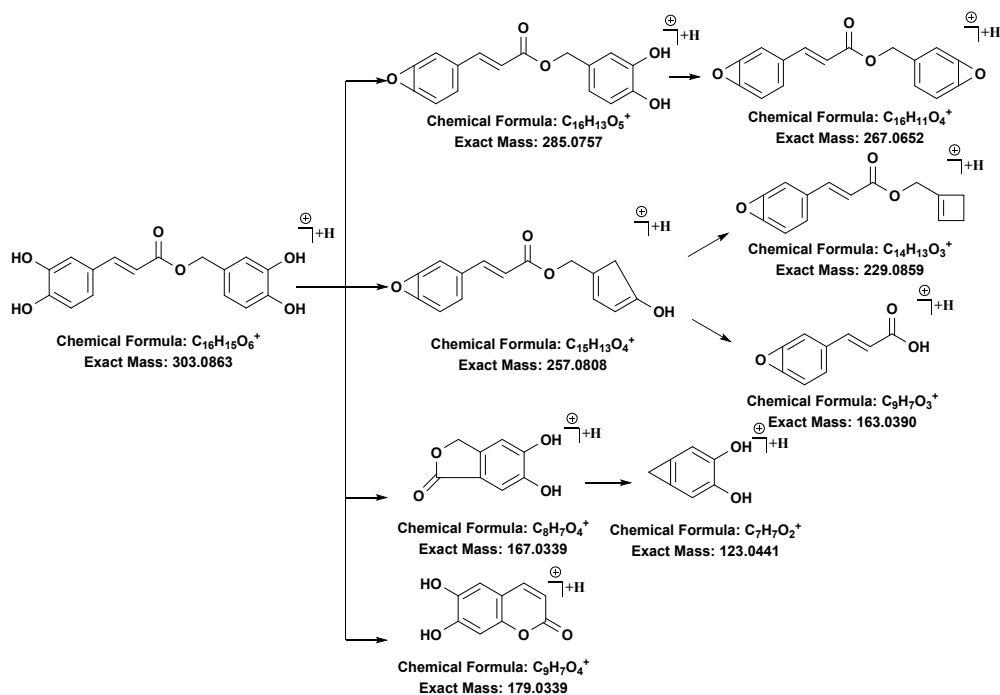



# S93

Unknown ( $t_R=17.44$  min)

MS<sup>1</sup>(+):

701.37151

MS<sup>2</sup>(+):

701.37067(100),539.31824(96),191.09856(1),105.03367(7)

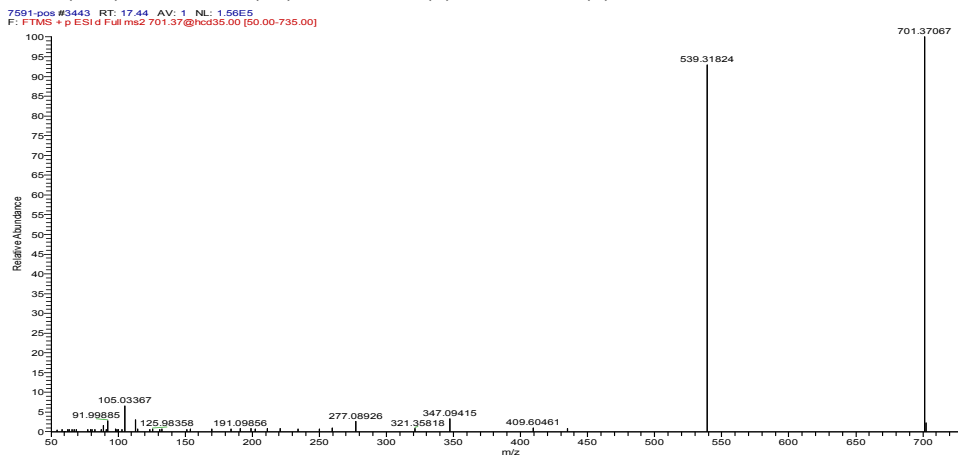

## S94

Benzoic acid, 3,4,5-trihydroxy-,1,1'-(2-methoxy-1,4-phenylene) ester OR isomer ( $t_R=4.17$  min)

MS<sup>1</sup>(+):

445.07617

MS<sup>2</sup>(+):

427.06525(4),409.05493(9),381.05975(1),343.04465(6),319.04428(23),287.05(10),275.05447(7),

263.05466(5),153.01807(100),141.01810(22)

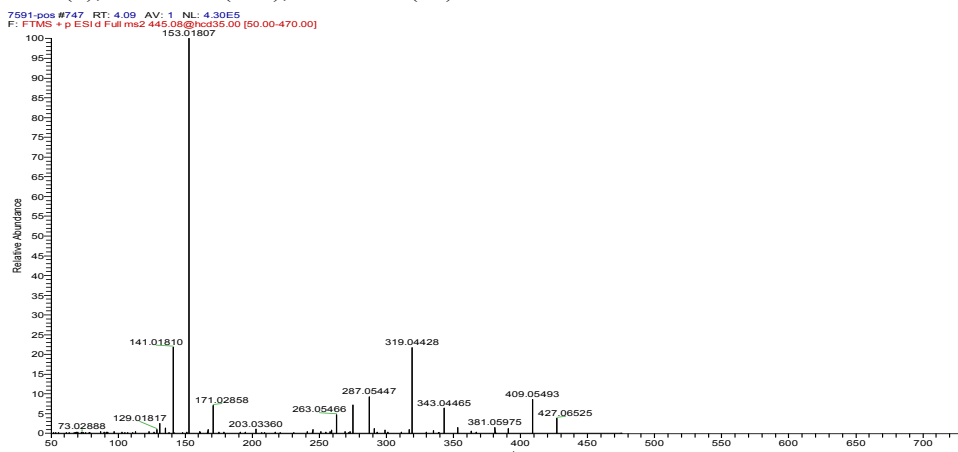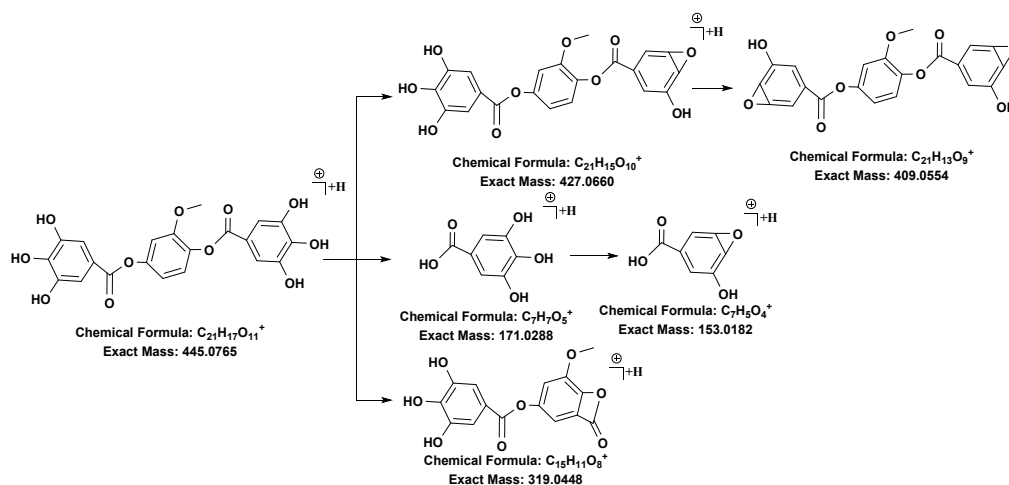

## S95

Unknown ( $t_R=5.67$  min)

MS<sup>1</sup>(+):

339.10696

MS<sup>2</sup>(+):

321.07611(3),234.03915(37),177.05437(100),145.02809(31),105.03366(13)

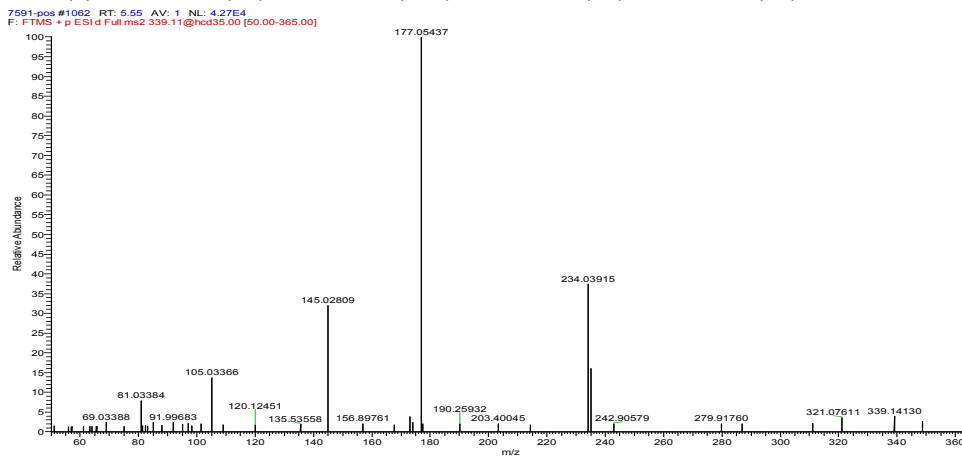

## S96

Isomer of hegoflavone A ( $t_R=11.70$  min)

MS<sup>1</sup>(+):

555.09167

MS<sup>2</sup>(+):

453.04468(11),435.03403(20),419.03882(10),269.03884(18),241.04912(12),121.02847(19),105.03368(34)

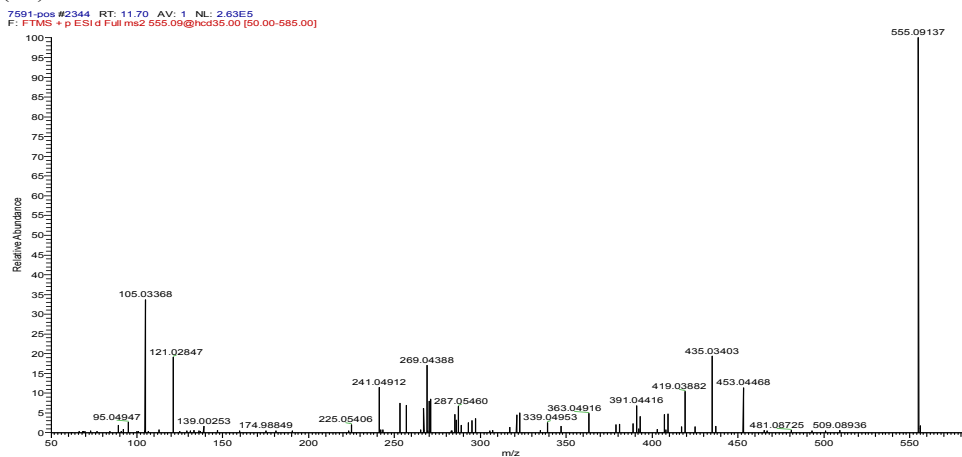

# S57, S97

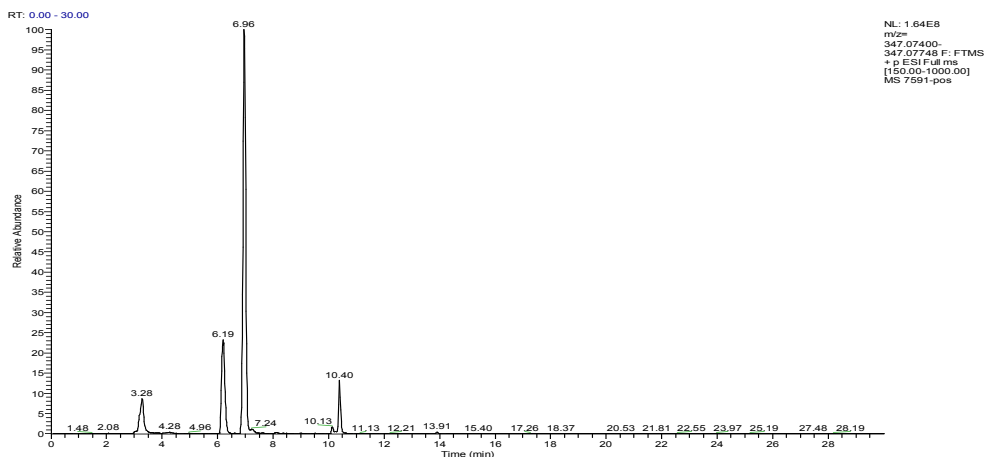

## S57 Viscidulin III ( $t_R=6.95$ min)<sup>61</sup>

MS<sup>1</sup>(+):

347.07574

MS<sup>2</sup>(+):

347.07541(63), 332.05203(100), 314.04147(35), 286.04645(2), 183.02850(3), 169.01292(7), 142.02594(3)

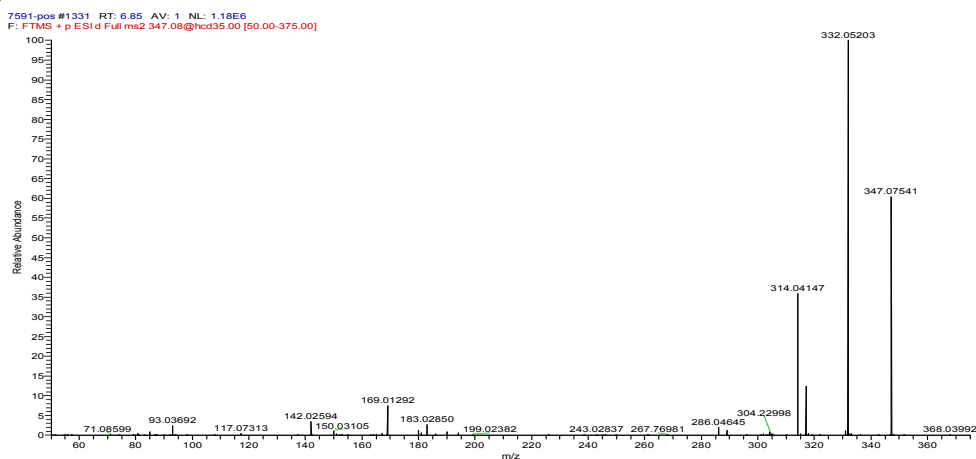

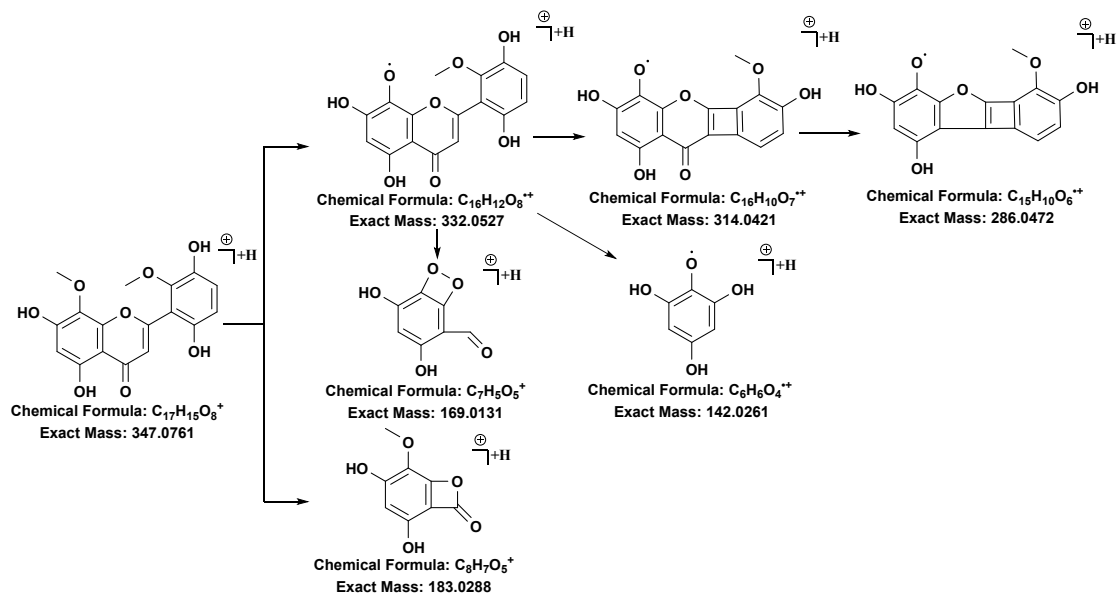

### S97 Isomer of S57 (Tetrahydroxy-dimethoxyflavone) ( $t_R=10.39$ min)

$MS^1(+)$ :

347.07572

$MS^2(+)$ :

347.07565(100),332.05206(26),317.02866(28),314.04156(37)

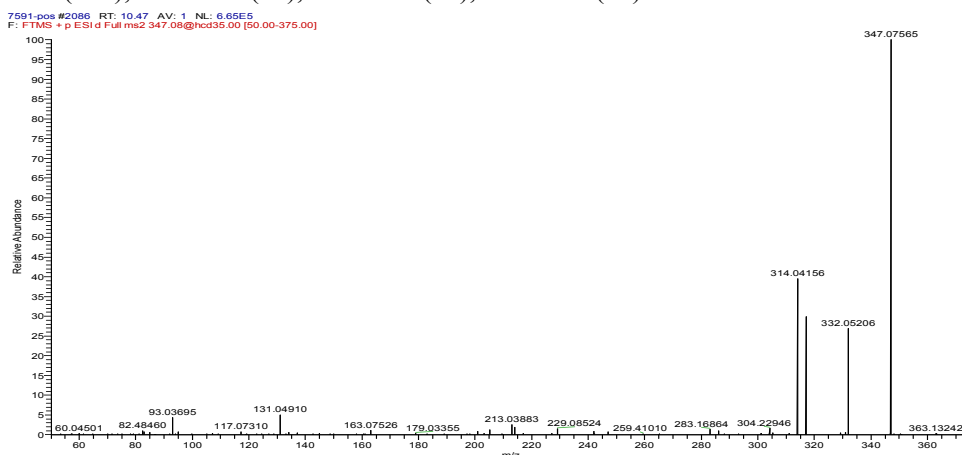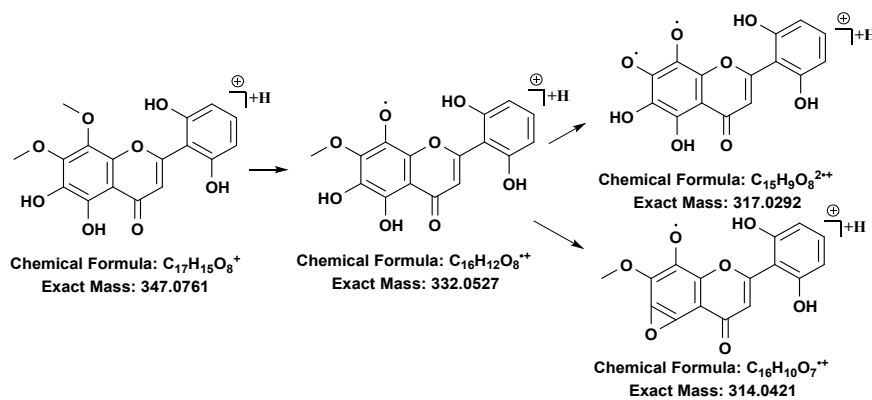

## S98

### 5,6'-Dihydroxy-6,7,8,2'-tetramethoxyflavone ( $t_R=14.00$ min)<sup>61</sup>

MS<sup>1</sup>(+):

375.10704

MS<sup>2</sup>(+):

360.08298(30),345.05960(100),342.07272(15),327.04913(16),227.05446(8),213.03889(9)

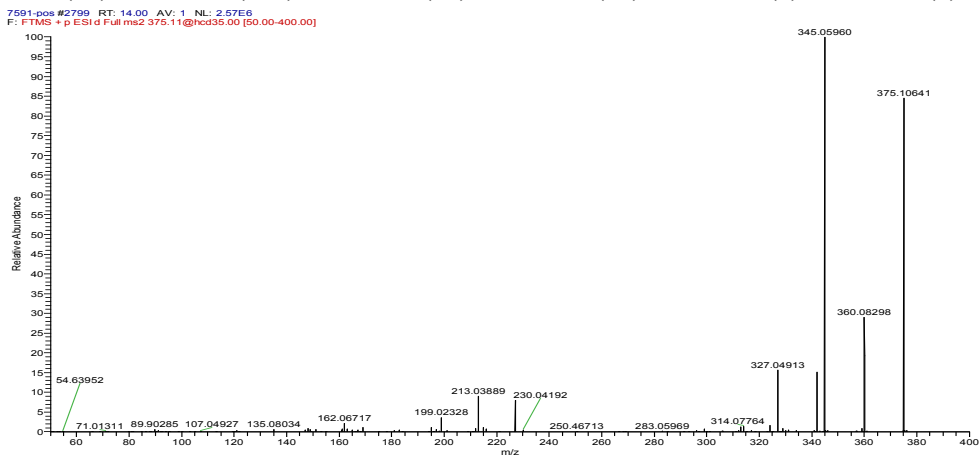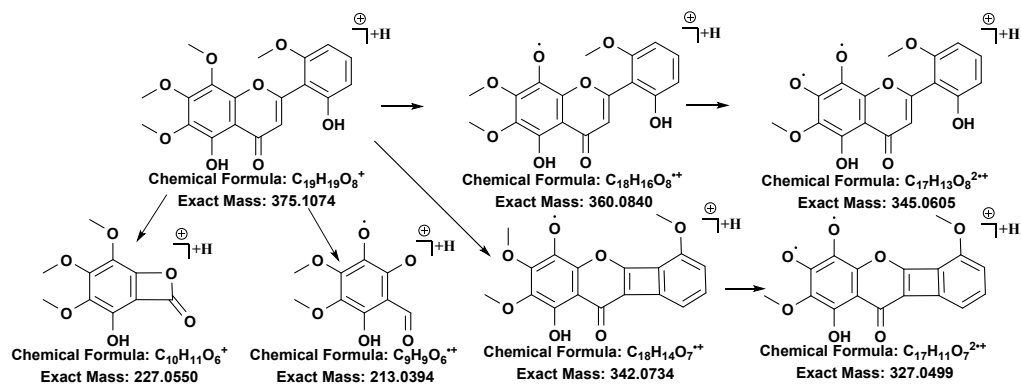

S99

Dihydroxy-dimethoxyflavone *O*-6''-malonylglucoside ( $t_R=11.14$  min)<sup>79</sup>

MS<sup>1</sup>(+):

563.13929

MS<sup>2</sup>(+):

315.08569(100),300.06229(19),285.03885(13),282.05182(7)

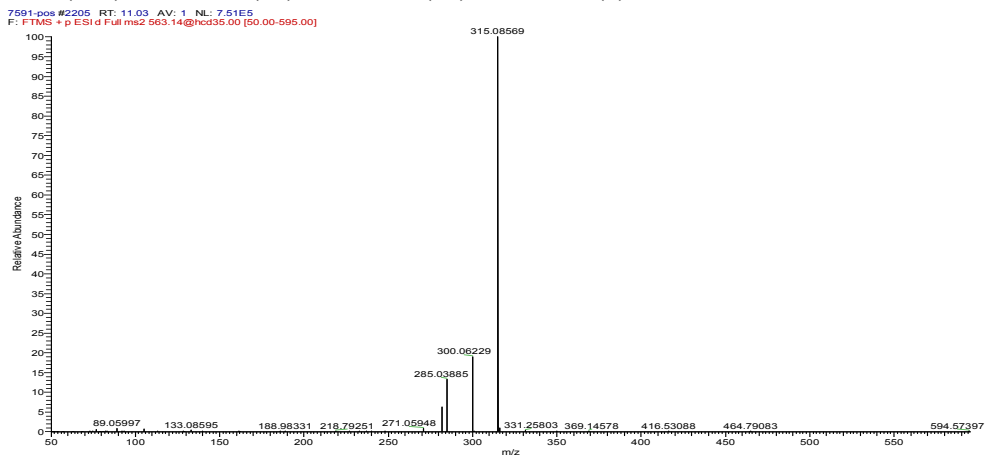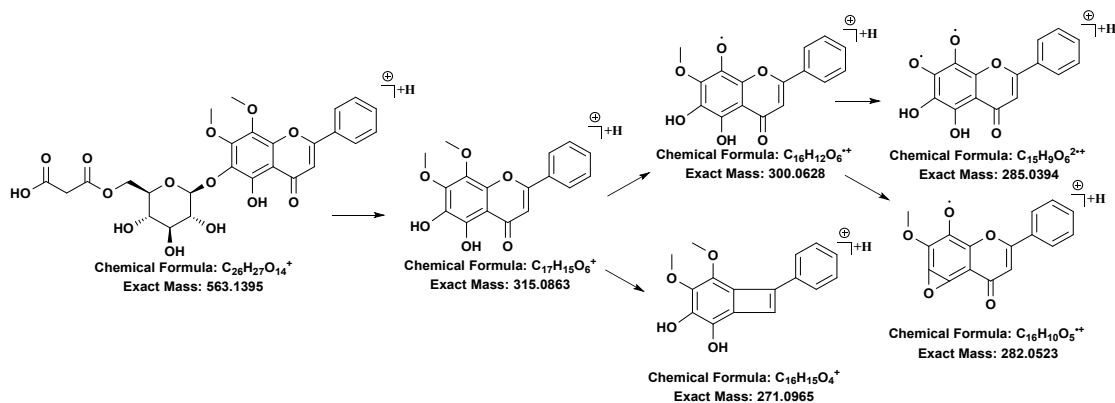

## S100

**Trihydroxy-methoxyflavone *O*-6''-malonylglucoside ( $t_R=10.35$  min)**

MS<sup>1</sup>(+):

549.12346 (positive)

MS<sup>2</sup>(+):

301.06992(100),286.04651(16)

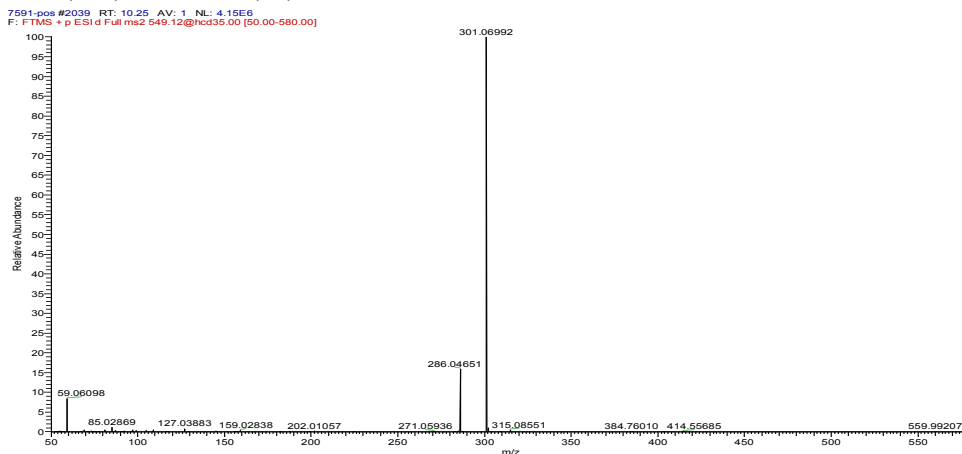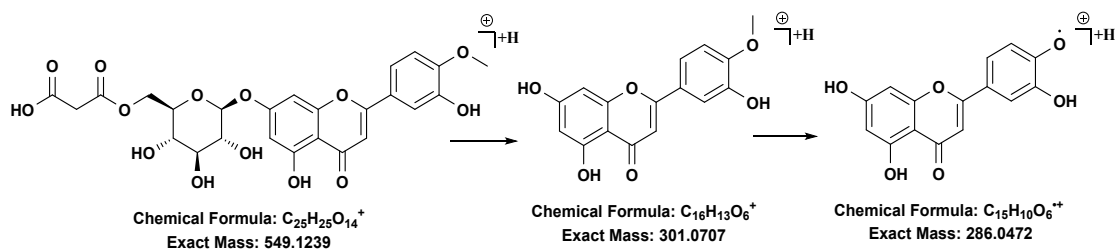

## S102

**Baicalein 7-*O*- $\beta$ -D-glucuronide-(1 $\rightarrow$ 3)[ $\beta$ -D-glucoside-(1 $\rightarrow$ 6)]- $\beta$ -D-glucoside<sup>80</sup> ( $t_R$  5.51)**

MS<sup>1</sup>(+):771.19748

MS<sup>2</sup>(+):285.07526(21),271.05966(100),159.02872(0.8),127.03899(3),85.02879(6)

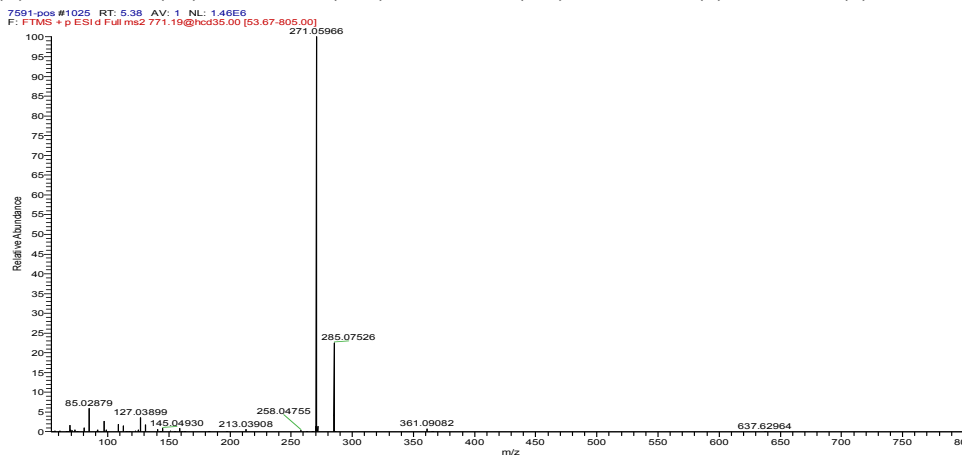



## S103, and S106

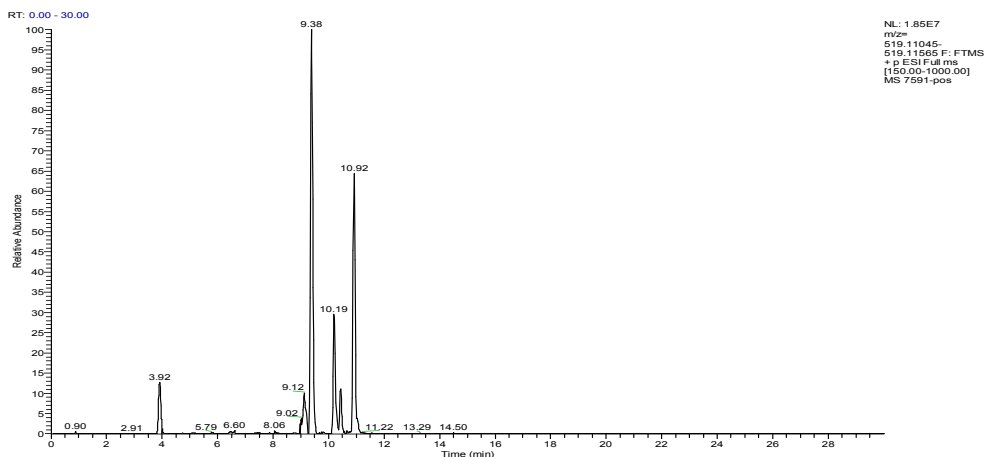

**S103 Trihydroxyflavone *O*-(6''-malonylglucoside) (Isomer of apigenin 7-(6''-malonylglucoside)) ( $t_R=10.93$  min)**

MS<sup>1</sup>(+):

519.11305

MS<sup>2</sup>(+):

343.08023(10),315.08505(69),311.05420(10),301.07013(20),283.05975(29),271.05951(100),231.

06464(5),201.09091(7)

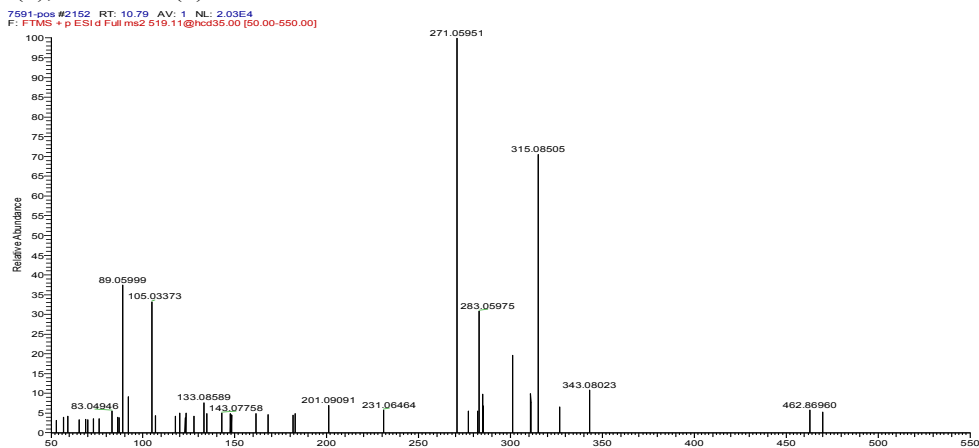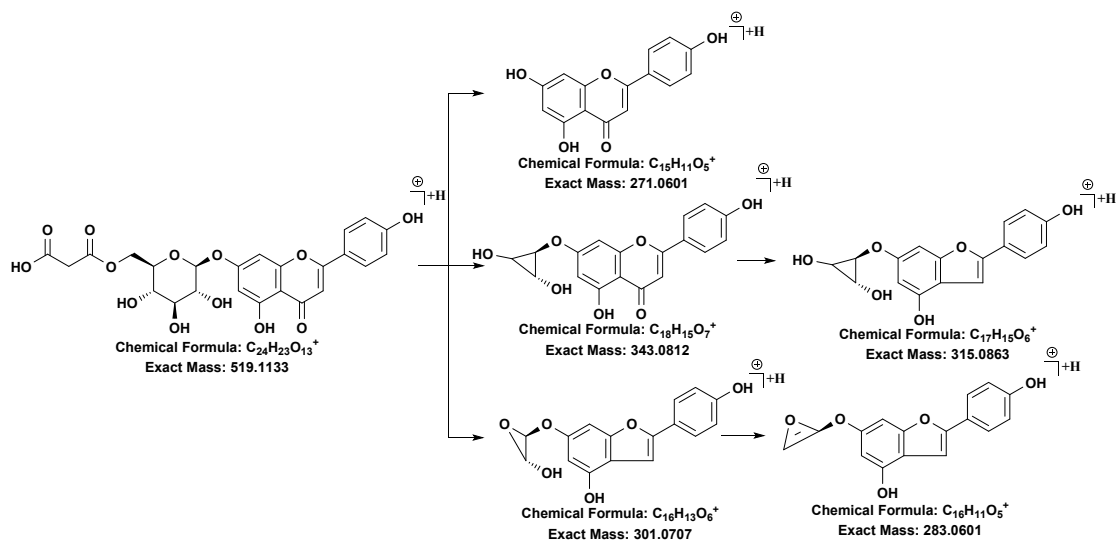

**S106 Isomer of S103 (Trihydroxyflavone *O*-(6''-malonylglucoside)) (t<sub>R</sub>=9.38 min)**

MS<sup>1</sup>(+):

519.1129

MS<sup>2</sup>(+):

337.06061(2),297.07465(7),285.07510(10),271.05954(73),255.06462(10),239.06934(1),231.06471(2),215.07065(1),174.55710(1),156.26376(1),105.03371(7),59.06100(100)

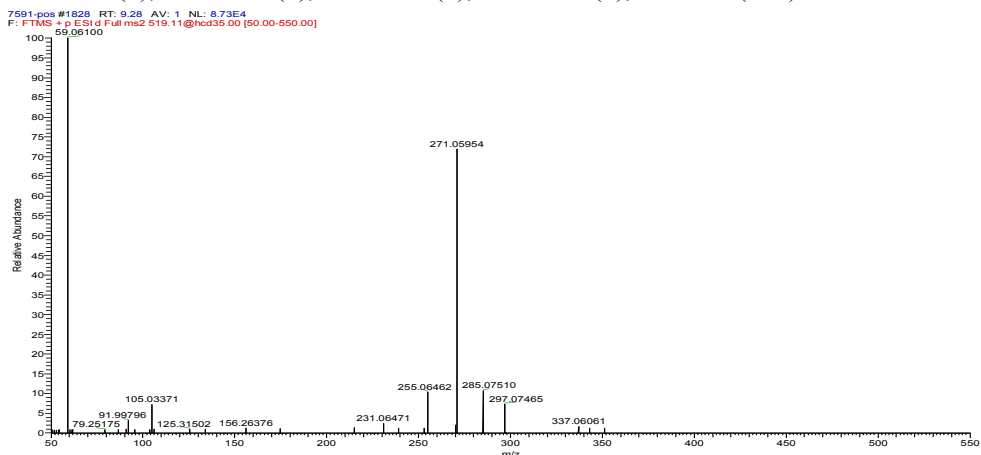

## S104, and S108

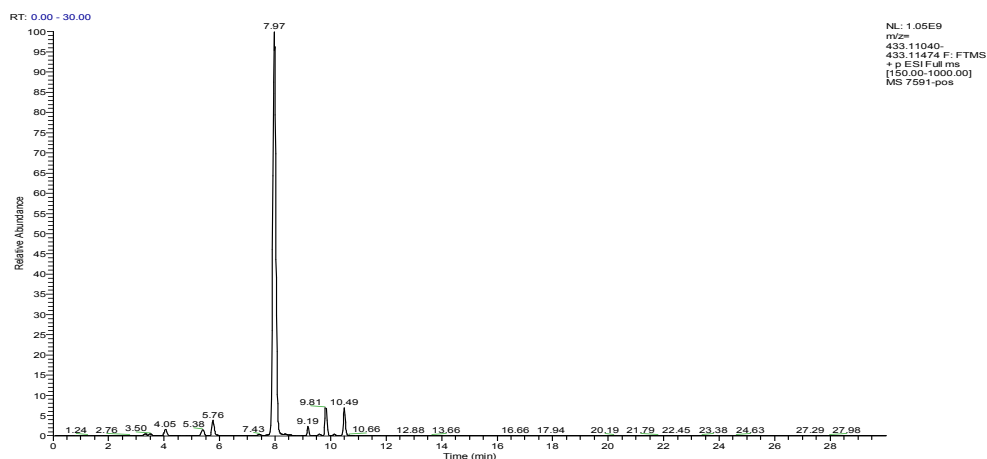

**S104 Isomer of Baicalein 7-*O*-glucoside (Trihydroxyflavone *O*-glucoside) ( $t_R=9.49$  min)<sup>61</sup>**

MS<sup>1</sup>(+):

433.11257

MS<sup>2</sup>(+):

271.05969(100)

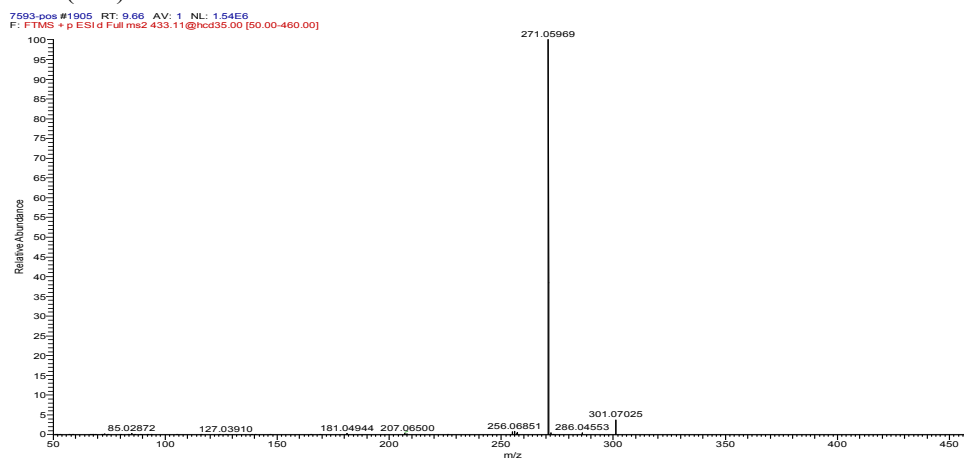

# S105

## Trihydroxy-trimethoxyflavone-*O*-glucoside ( $t_R=5.72$ min)<sup>62</sup>

MS<sup>1</sup>(+):

523.14417

MS<sup>2</sup>(+):

361.09100(100),346.06732(8),331.04391(8),328.05756(3),313.03406(3)

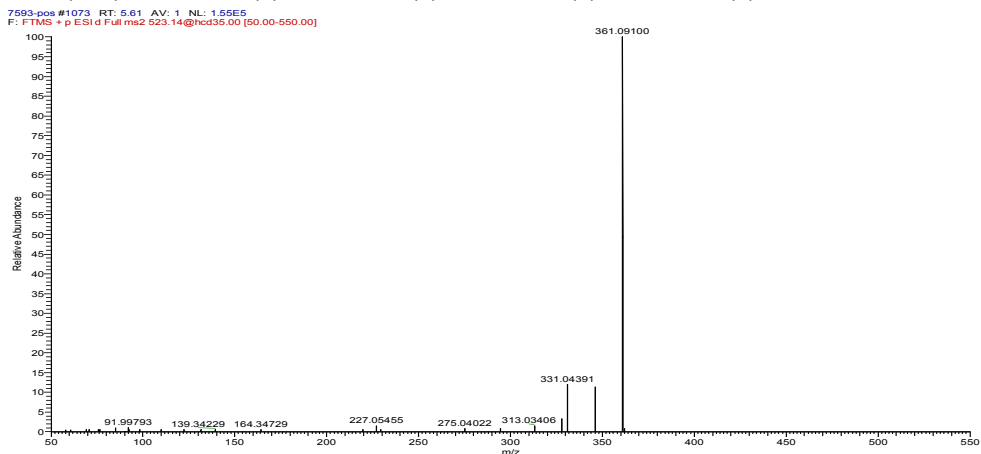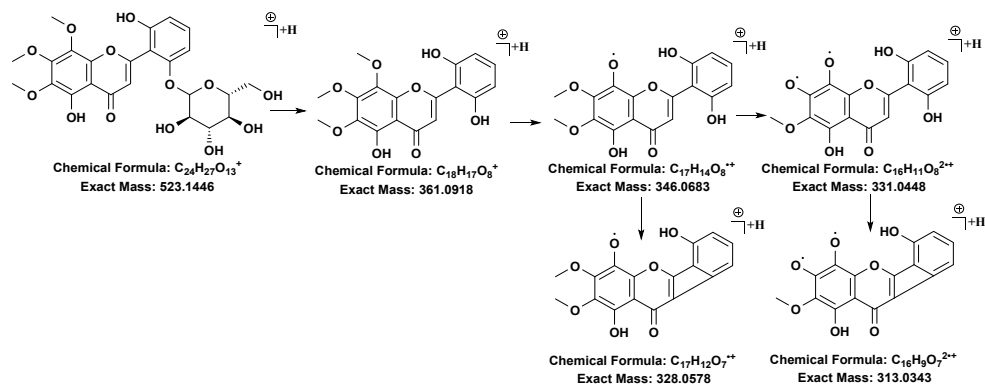

## S107

Oroxylin A 7-*O*-glucoside ( $t_R=10.34$  min)<sup>61</sup>

MS<sup>1</sup>(+):447.12802

MS<sup>2</sup>(+):285.07468(100),270.05124(15)

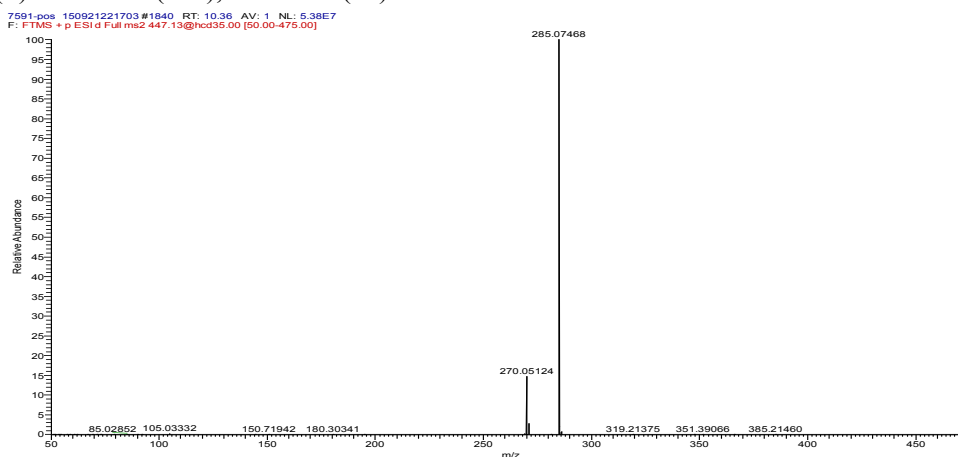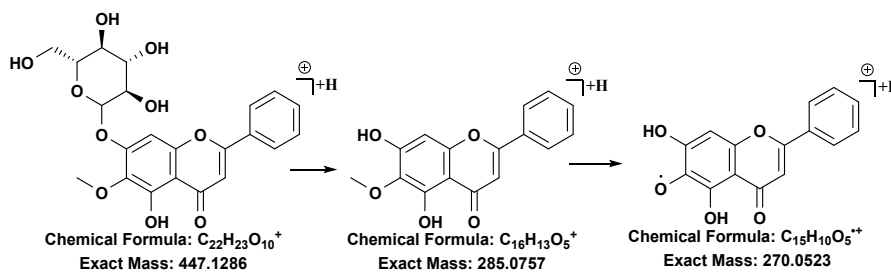

## S108

Isomer of Baicalein 7-*O*-glucoside (Trihydroxyflavone *O*-glucoside) ( $t_R=9.49$  min)<sup>61</sup> ( $t_R$  5.77)

MS<sup>1</sup>(+):433.11249

MS<sup>2</sup>(+):271.05957(100),169.01288(0.1)

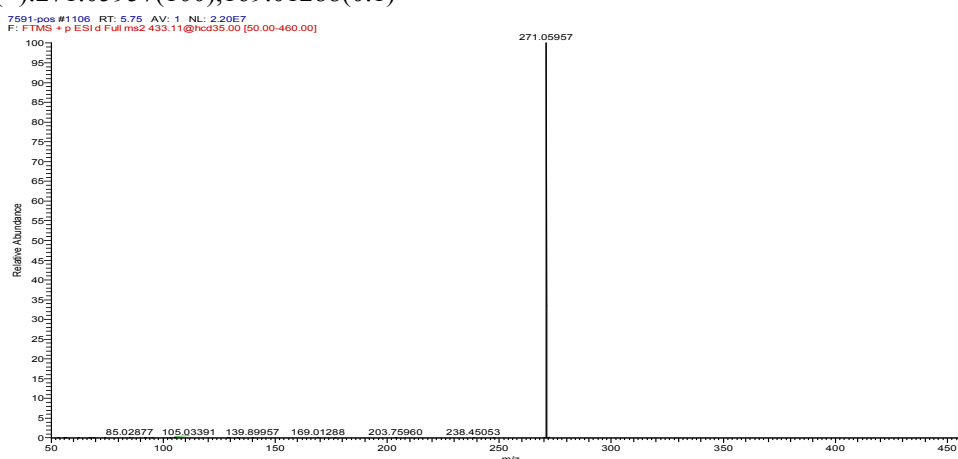

## S109

Isomer of Apigenin 7-*O*-sophoroside ( $t_R=5.41$  min)<sup>81</sup>

MS<sup>1</sup>(+):595.16536

MS<sup>2</sup>(+):271.05954(100),127.03880(1)

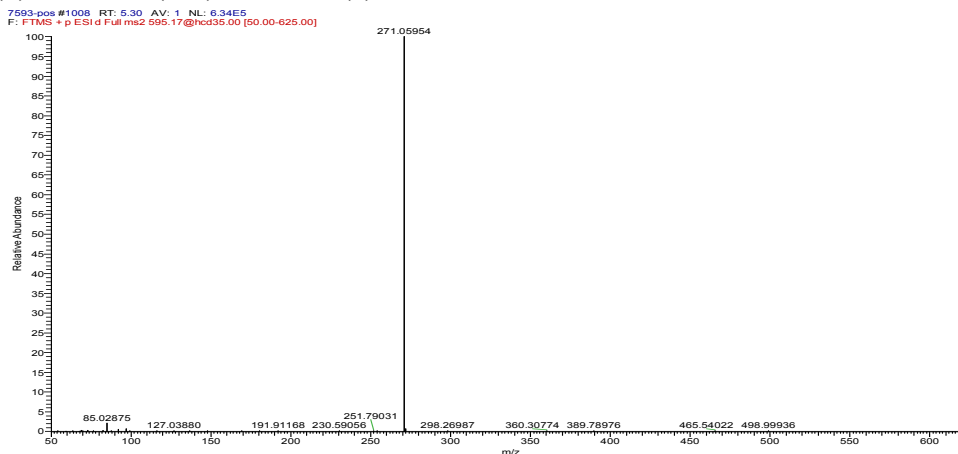

## S110

Dihydroxy-methoxyflavone *O*-(6''-malonylglucoside) ( $t_R=10.63$  min)

MS<sup>1</sup>(+):533.12852

MS<sup>2</sup>(+):285.07535(100),270.05191(18),267.06497(0.3),253.04749(0.1),239.06937(0.1)

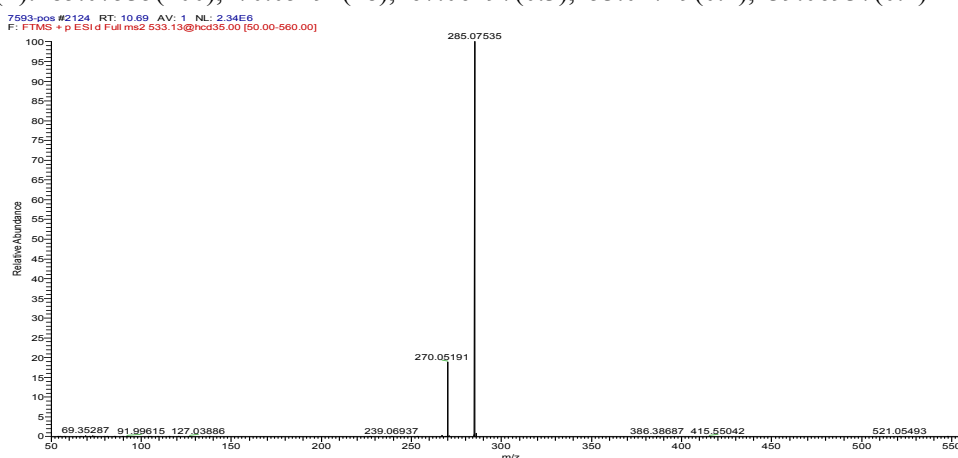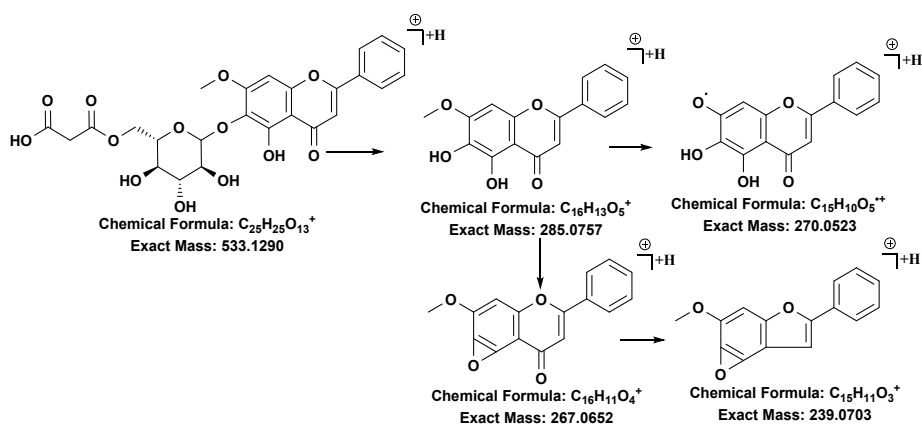

## S111

Isomer of Clerodendrin ( $t_R=5.97$  min)<sup>66</sup>

MS<sup>1</sup>(+):

623.12372

MS<sup>2</sup>(+):

285.07532(100),271.05948(68),270.05182(15)

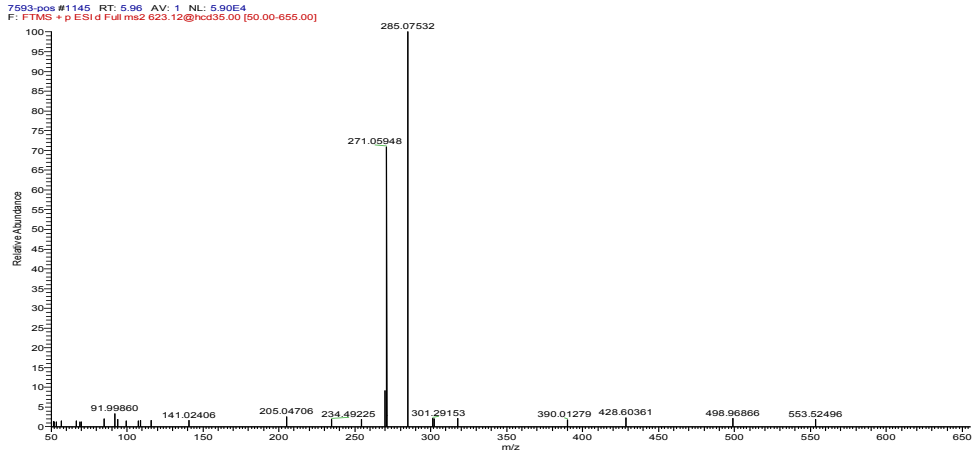

## S112

Isomer of Acacetin 7-O- $\beta$ -sophoroside ( $t_R=5.36$  min)

MS<sup>1</sup>(+):

609.18105

MS<sup>2</sup>(+):

285.07538(100),271.05981(15),270.05107(6)

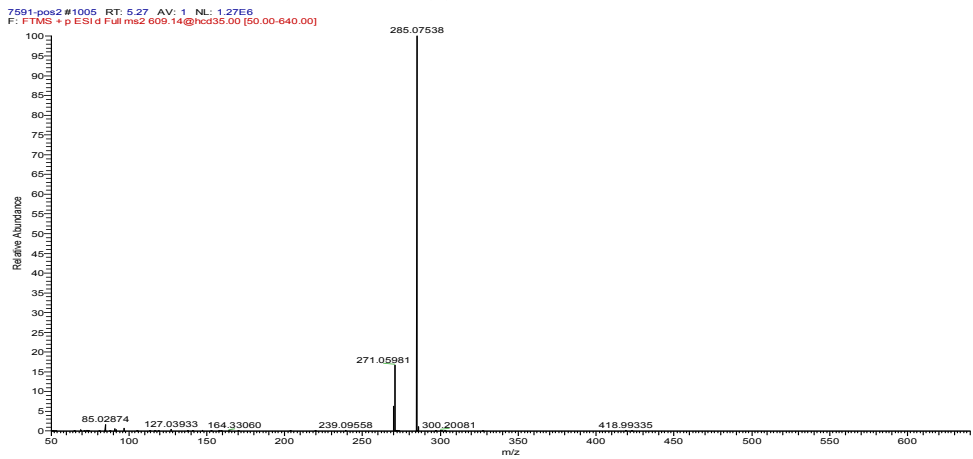

# S113

Dihydroxy-methoxyflavone *O*-glucuronide ethyl ester ( $t_R=12.13$  min)<sup>67</sup>

MS<sup>1</sup>(+):

489.13876

MS<sup>2</sup>(+):

285.07523(100), 270.05176(18), 175.07506(1), 165.09137(0.2), 105.03358(2)

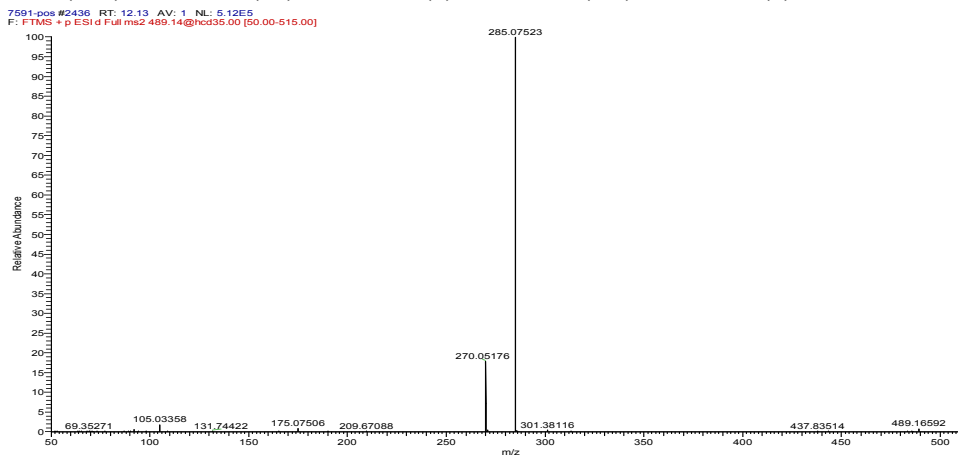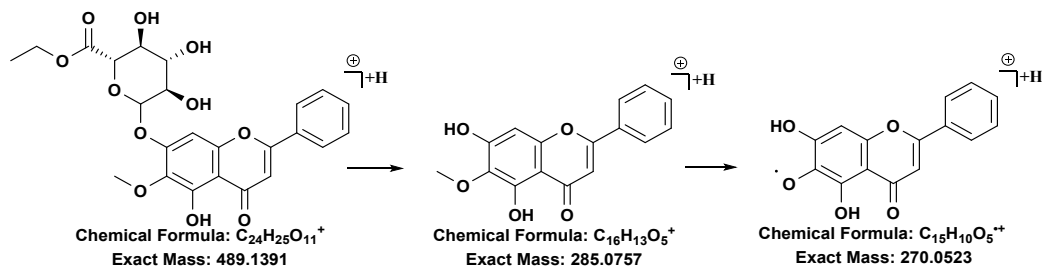



**8,8'-Bibaicalein ( $t_R=12.57$  min)<sup>61</sup>**MS<sup>1</sup>(+):539.09695 (positive)MS<sup>2</sup>(+):521.08783(3),503.0761(1),493.09171(4),465.0969(2),449.1020(1),437.04977(100),419.03888(71),401.02802(10),391.04047(5),375.05029(8),363.0499(3),347.0550(2),323.05453(50),297.03854(6),271.05960(58),270.04407(24),269.04407(70),241.04915(62),225.05426(4)7591-pos #2511 RT: 12.48 AV: 1 NL: 1.28E5  
F: FTMS + p ESI d Full ma2 539.10@hcd35.00 [50.00-570.00]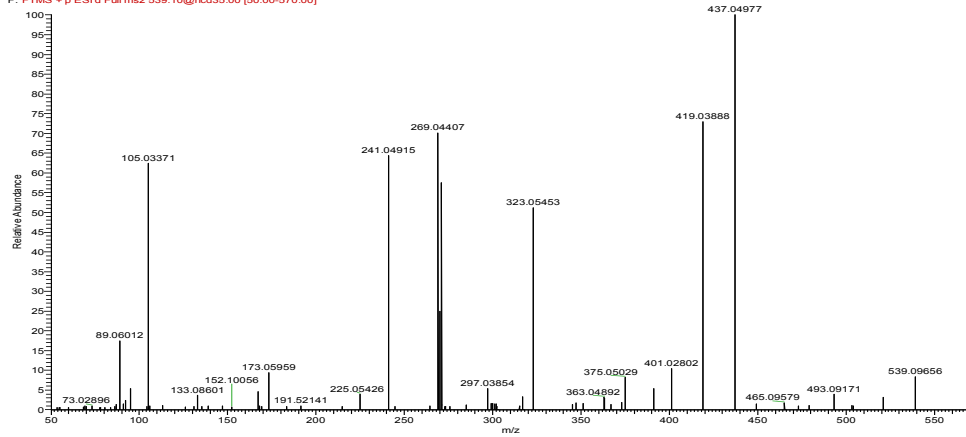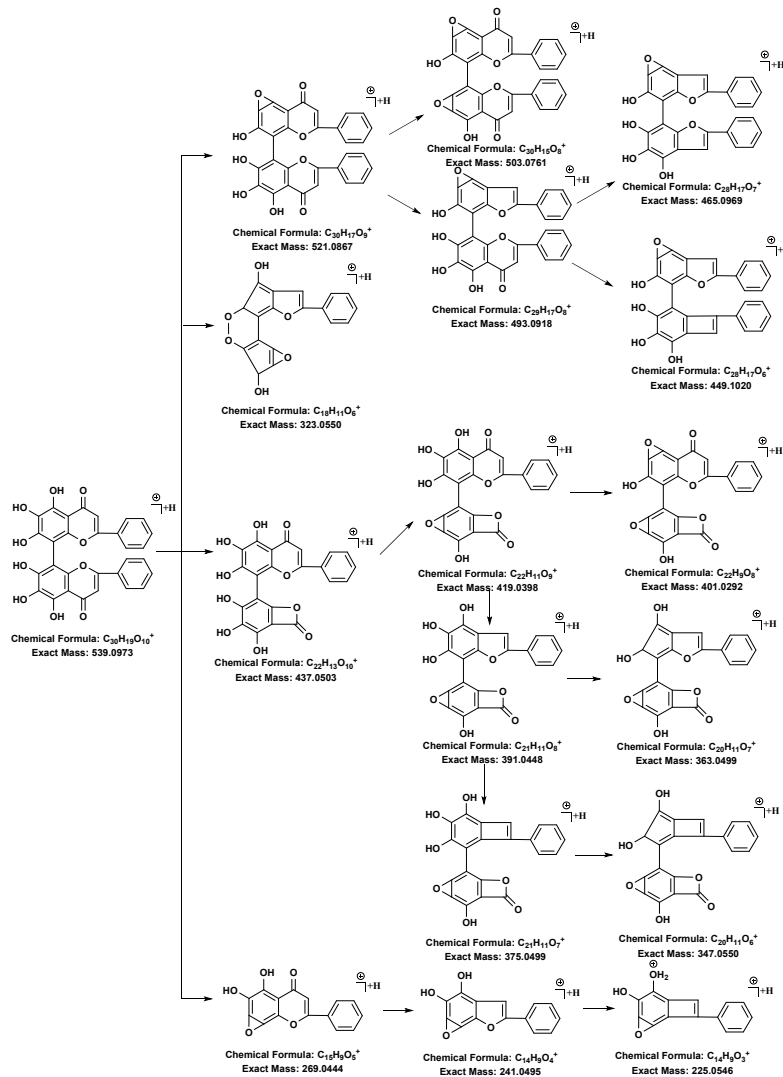

# M1

**Chrysin O-sulfate ( $t_R=11.1$  min)**

$MS^1(-)$ :333.00798

$MS^2(-)$ :253.05118(100)

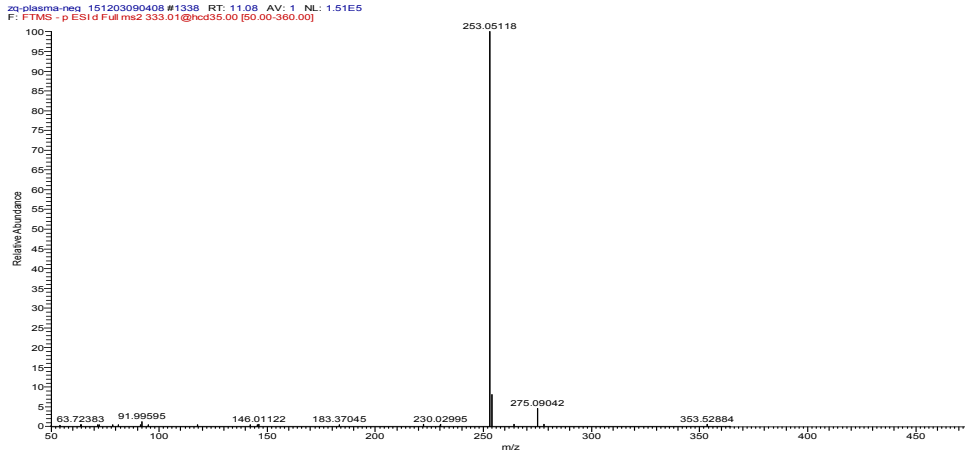

**M2 Apigenin O-sulfate ( $t_R=9.50$  min)**

$MS^1(-)$ :349.00297

$MS^2(-)$ :269.04642(100),225.05632(1)

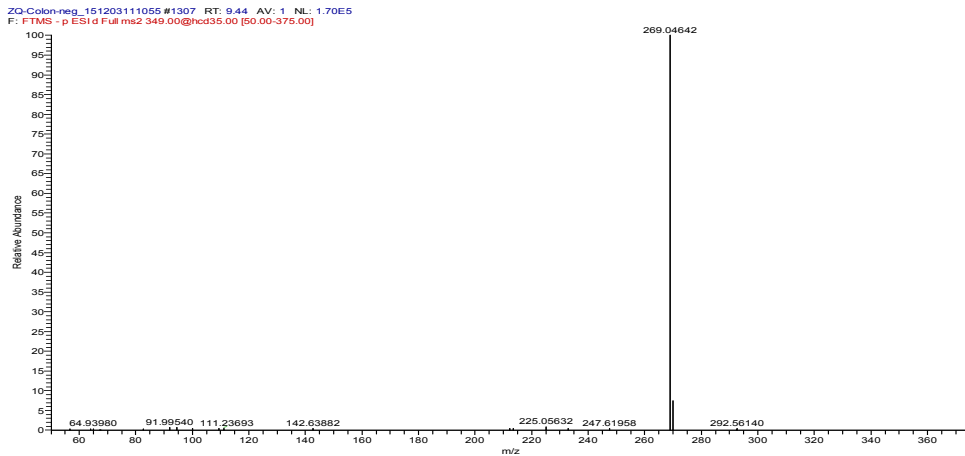

### M3

**Baicalein *O*-sulfate ( $t_R=10.06$  min)**

$MS^1(-)$ : 349.00301

$MS^2(-)$ : 269.04636(100), 251.03532(0.3), 197.06163(0.1)

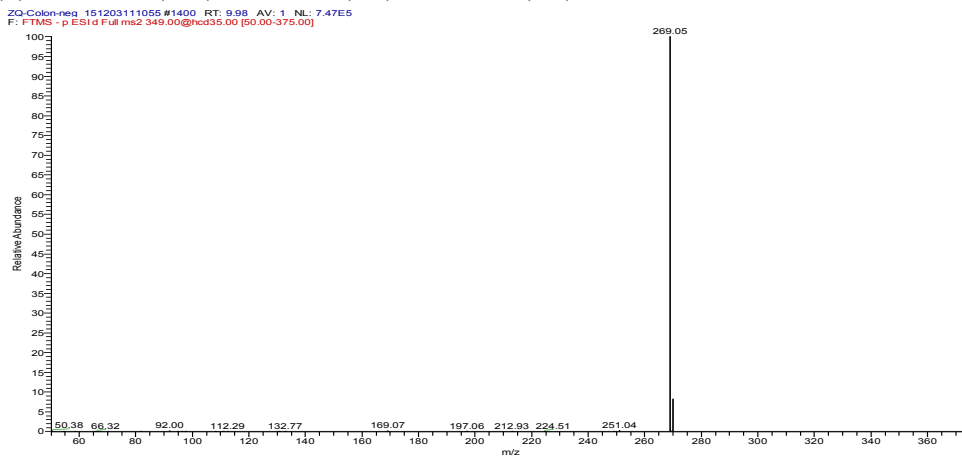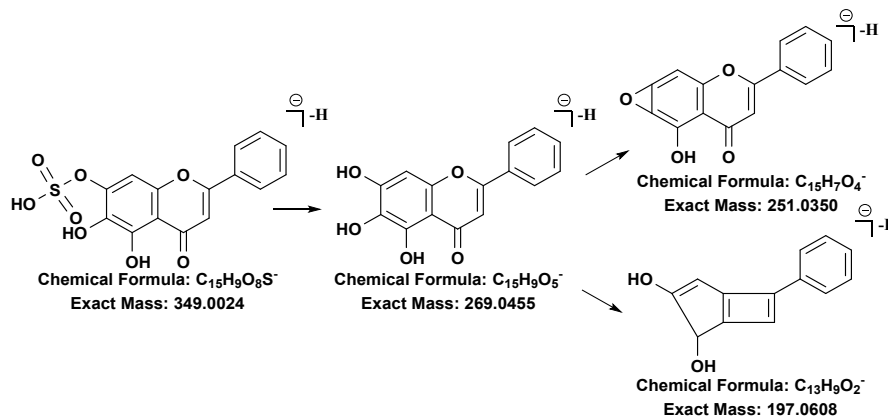

### M4

**Wogonin *O*-sulfate ( $t_R=11.10$  min)**

$MS^1(-)$ : 363.01881

$MS^2(-)$ : 283.06204(96), 268.03854(100)

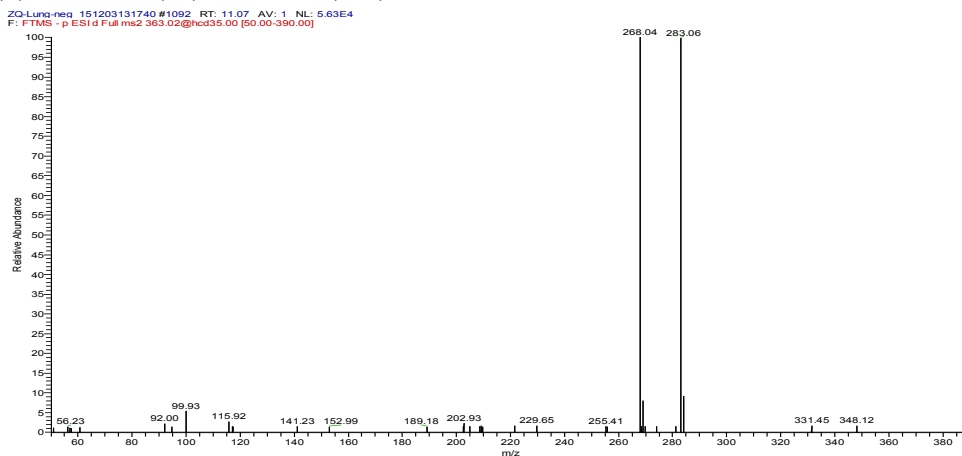

## M5

6,7-Dehydrobaicalein ( $t_R=11.90$  min)

MS<sup>1</sup>(-): 267.03054

MS<sup>2</sup>(-): 239.03534(100), 211.04114(1.14), 136.98807(13.85)

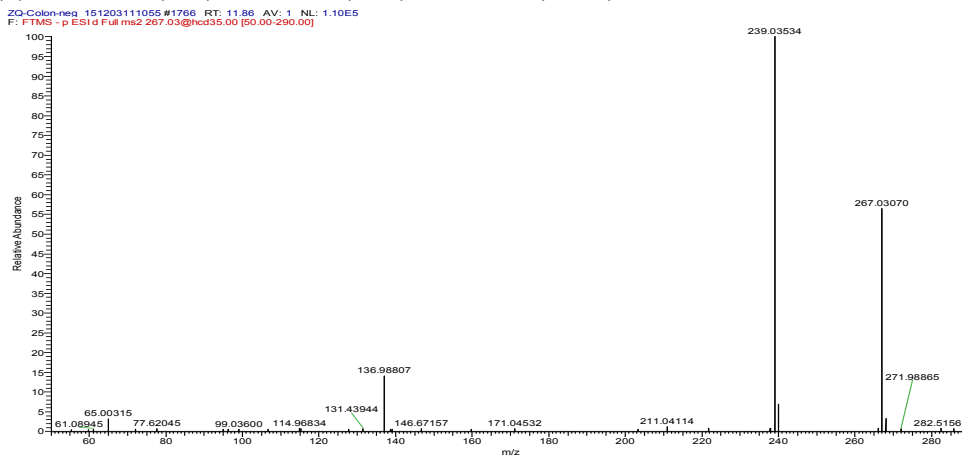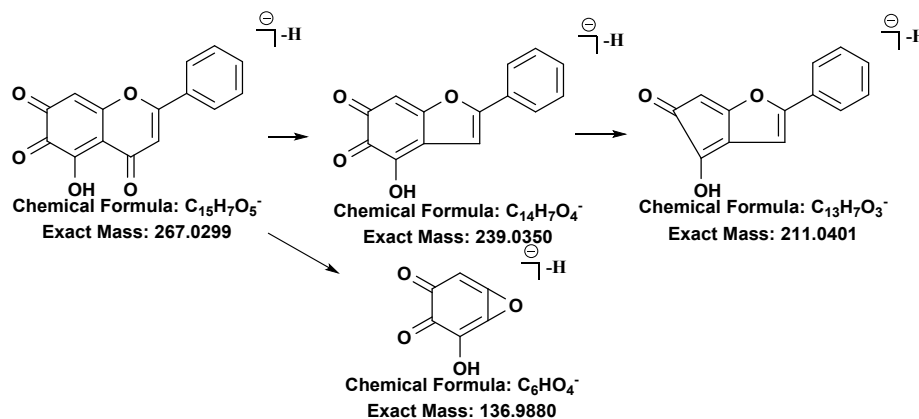

## M6

Isomer of hydroxylation of baicalin (Tetrahydroxyflavone) ( $t_R=6.90$  min)

MS<sup>1</sup>(-): 285.04126

MS<sup>2</sup>(-): 285.04123(100), 151.08276(1)

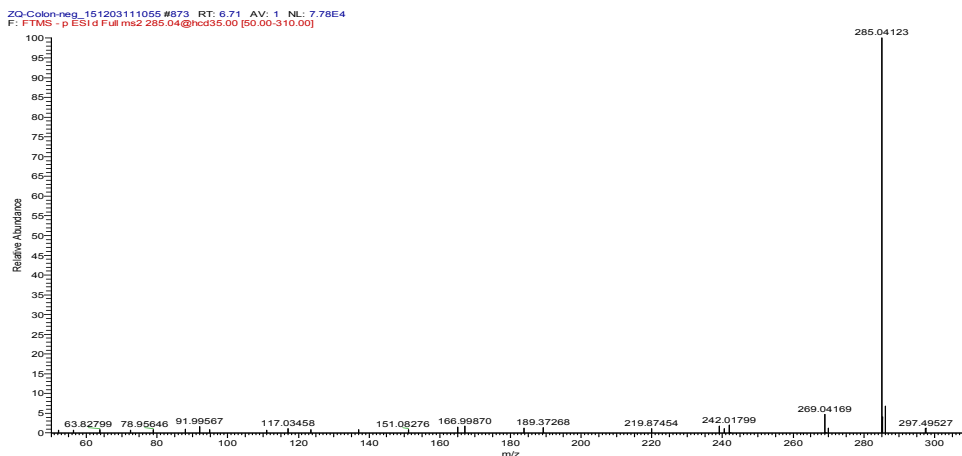

## M7

### Hydroxylation of baicalin (Tetrahydroxyflavone) ( $t_R=5.80$ min)

MS<sup>1</sup>(-): 285.04125

MS<sup>2</sup>(-): 285.04132(100), 241.05148(20), 199.04099(15), 151.00395(66), 133.02989(6)

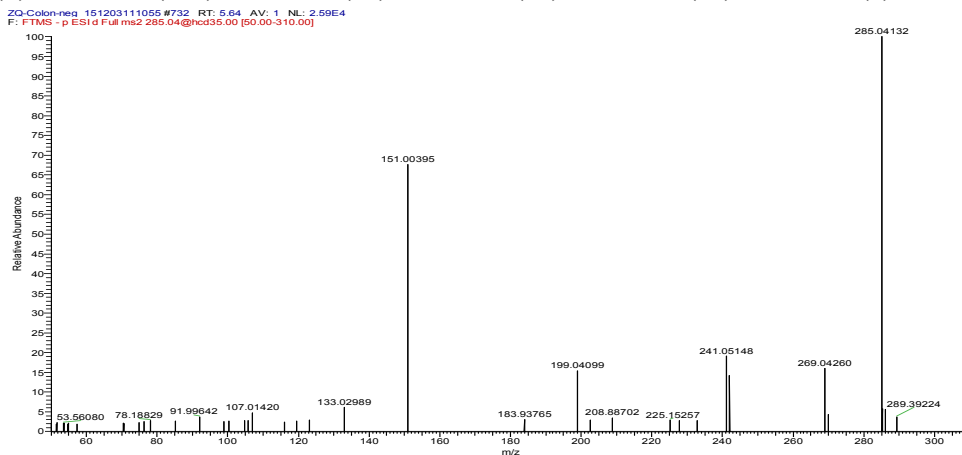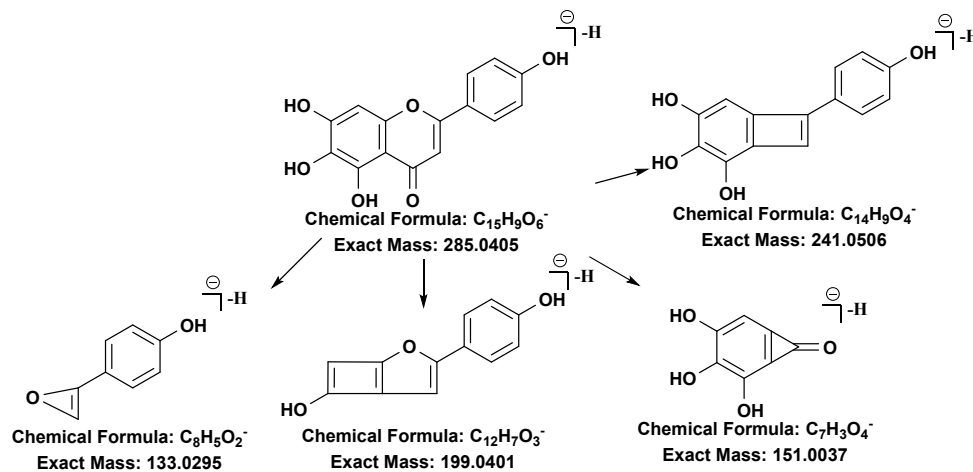

## M8

### Isomer of kanzakiflavone I ( $t_R=10.87$ min)

MS<sup>1</sup>(-): 327.05179

## M9

### Trihydroxy-dimethoxyflavone ( $t_R=11.80$ min)

MS<sup>1</sup>(-): 329.06732

MS<sup>2</sup>(-): 329.06747(5), 314.04416(97), 299.02051(100), 271.02548(4), 227.03551(11), 199.04102(4)

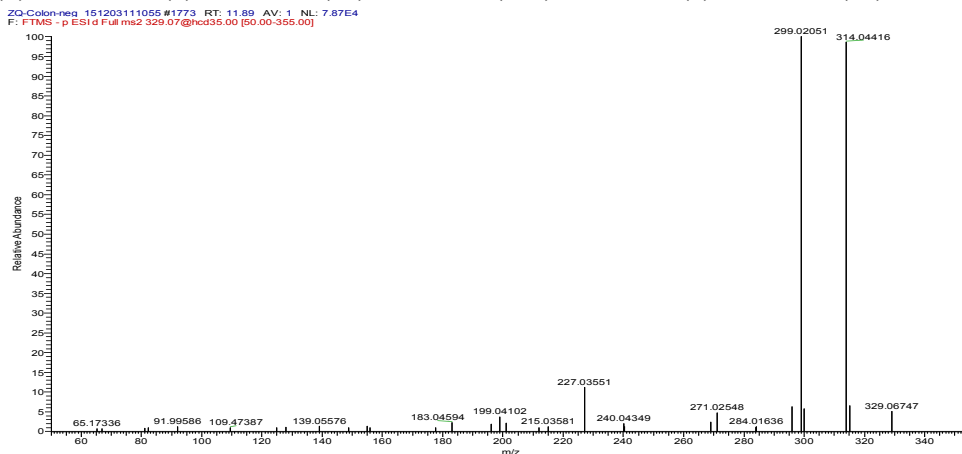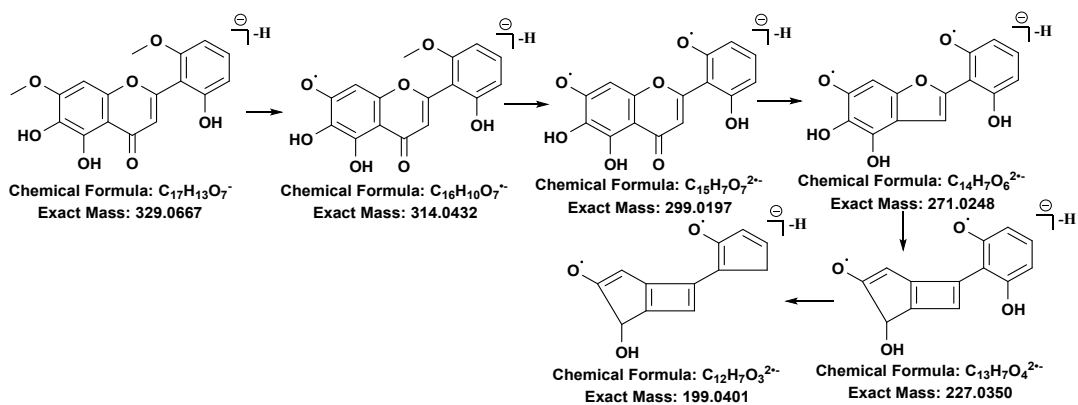

# M10

## Dihydroxy-trimethoxyflavone ( $t_R=14.60$ min)

MS<sup>1</sup>(-):

343.08295

MS<sup>2</sup>(-):

328.05975(27),313.03641(100),298.01288(14),271.01740(2),209.00899(0.5),194.99405(2)

ZQ-Colon-neg 151203111055 #2258 RT: 14.54 AV: 1 NL: 1.78E5  
F: FTMS - p ESI d Full ms2 343.08@nod35.00 [50.00-370.00]

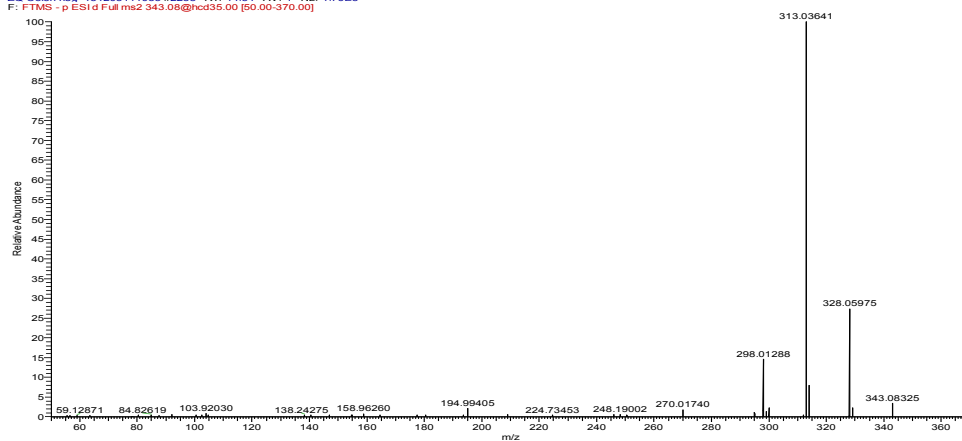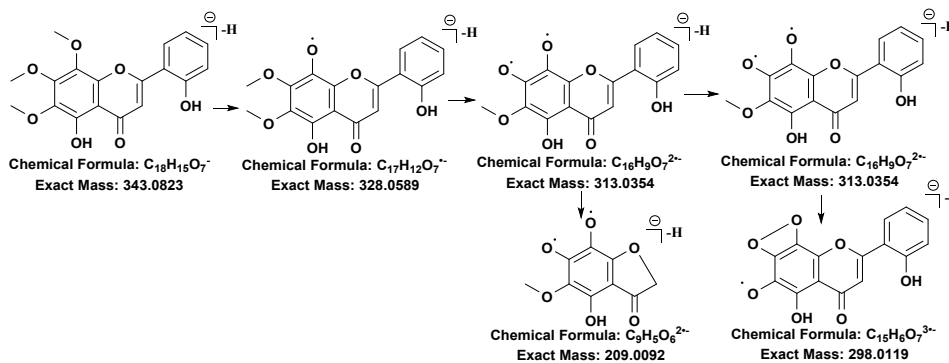

# M11

## Trihydroxy-trimethoxyflavone ( $t_R=11.80$ min)

MS<sup>1</sup>(-): 359.07789

MS<sup>2</sup>(-): 344.05469(60), 329.03140(100), 314.00830(2), 311.02087(2), 301.03745(6), 297.00381(2), 285.04218(1), 242.02234(1), 198.03300(3), 154.99925(2)

ZD-Colest-neg\_151203111055#1752 RT: 11.79 AV: 1 NL: 7.49E4  
F: FTMS -p ESI d Full ms2 359.08@ncd35.00 [50.00-385.00]

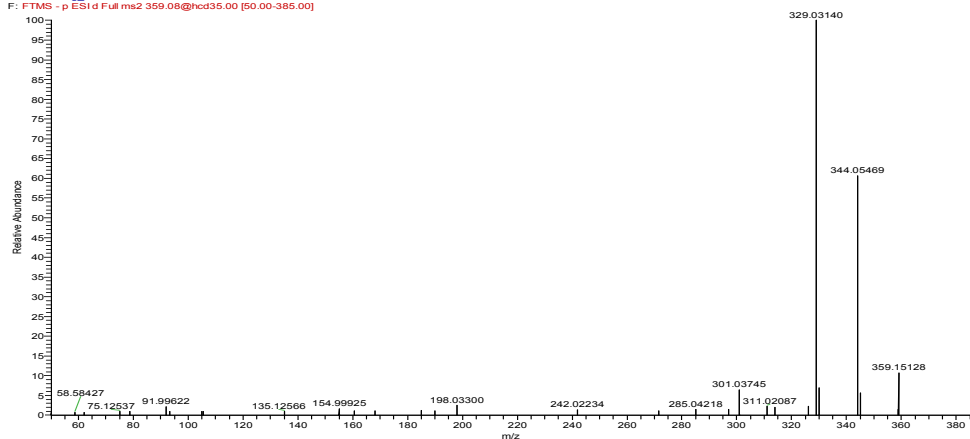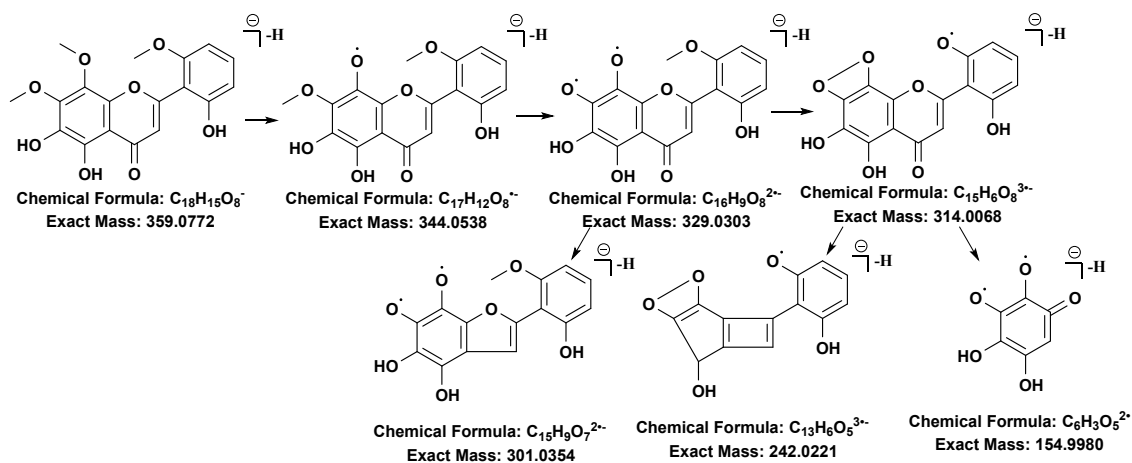



## M12

### 2,5-Dihydroxyflavone 6-C-arabinoside ( $t_R=11.40$ min)

MS<sup>1</sup>(-): 387.10951

MS<sup>2</sup>(-): 369.09869(0.4), 351.08817(1), 327.08862(4), 309.08862(3), 297.07758(100), 269.08313(5), 255.06735(2), 191.03568(5)

ZD-Colem-neg\_151203111055#1660 RT: 11.43 AV: 1 NL: 3.54E5  
F: FTMS -p ESI d Full ms2 387.11@hcd35.00 [50.00-415.00]

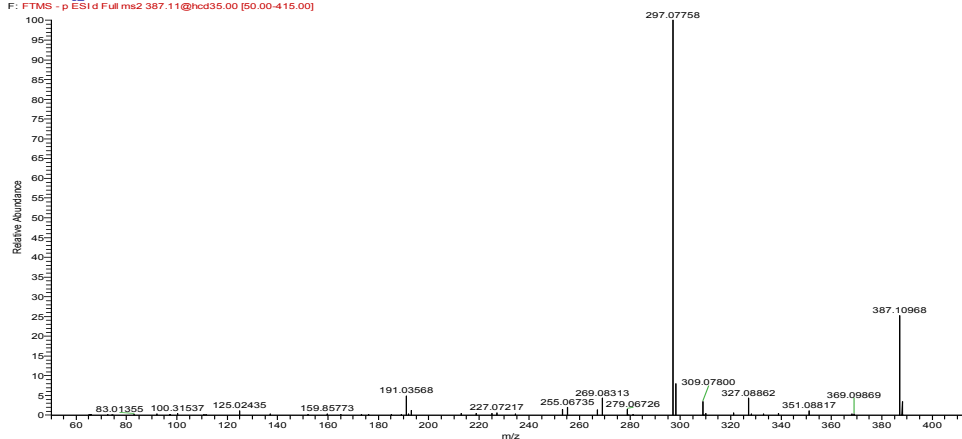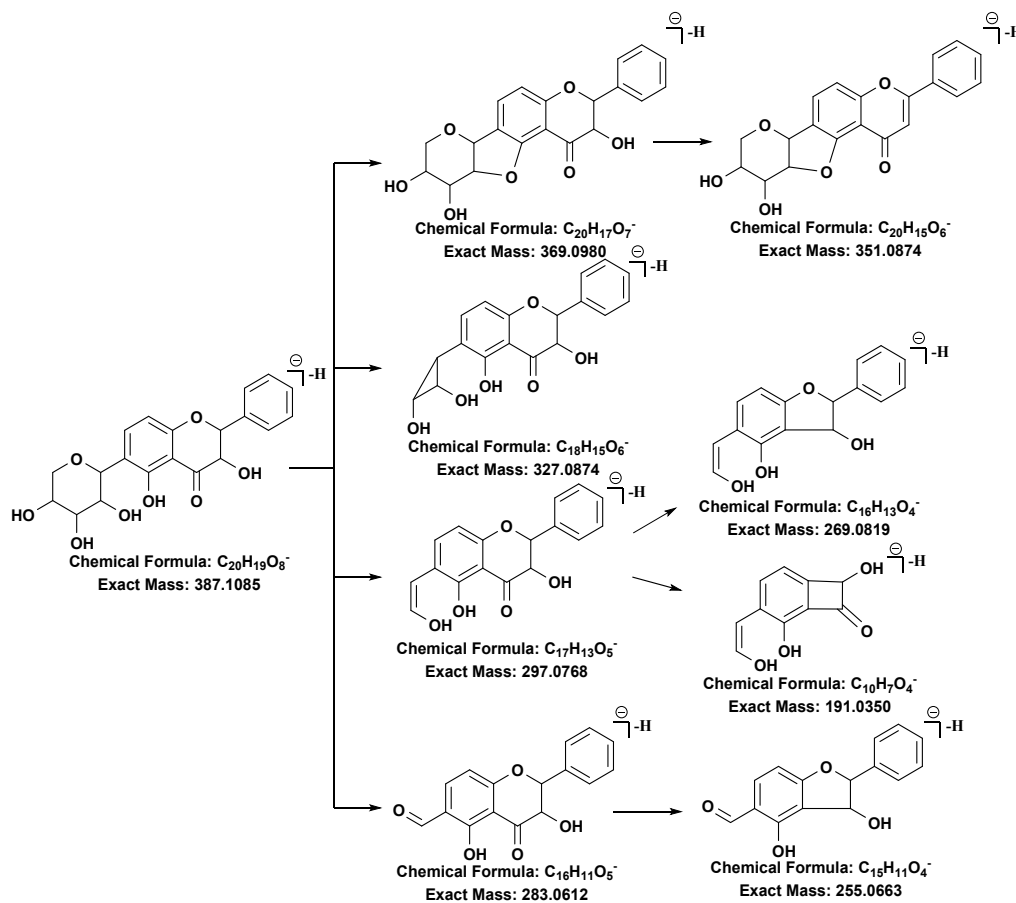

## M13

### Trihydroxy-tetramethoxyflavone ( $t_R=12.9$ min)

MS<sup>1</sup>(-):

389.08871

MS<sup>2</sup>(-):

374.06497(100),359.04156(84),344.01788(25),316.02380(4),300.02774(7),285.00543(1),183.030

52(1)

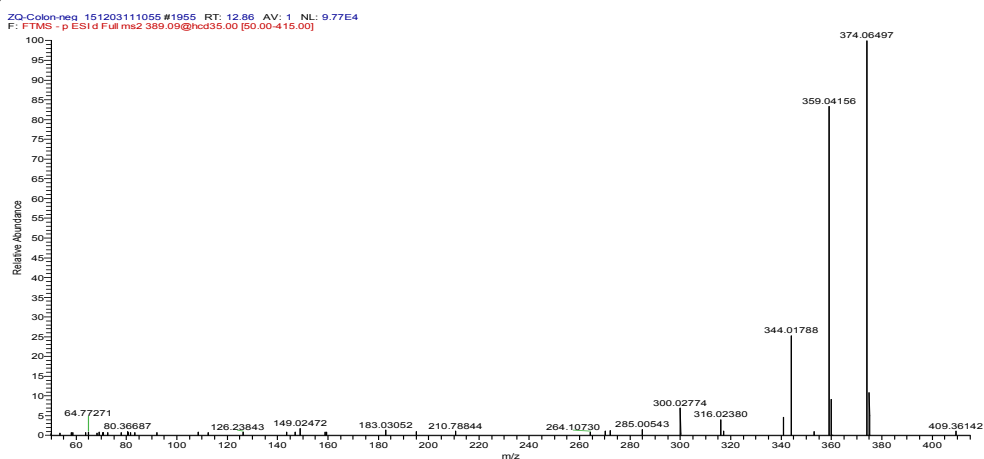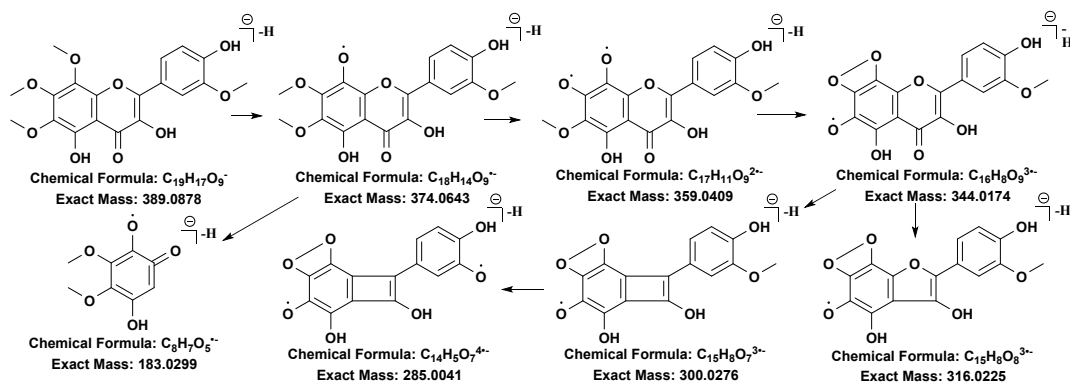

# M14

Phlorizin ( $t_R=10.50$  min)

MS<sup>1</sup>(-):

419.13573

MS<sup>2</sup>(-):

329.10379(17),299.09293(100),257.08221(32),197.04630(9),195.77(2),167.03508(55)

ZQ-Colon-neg 151203111055 #1495 RT: 10.49 AV: 1 NL: 5.51E4  
F: FTMS - p ESI d Full ms2 419.14@nod35.00 [50.00-445.00]

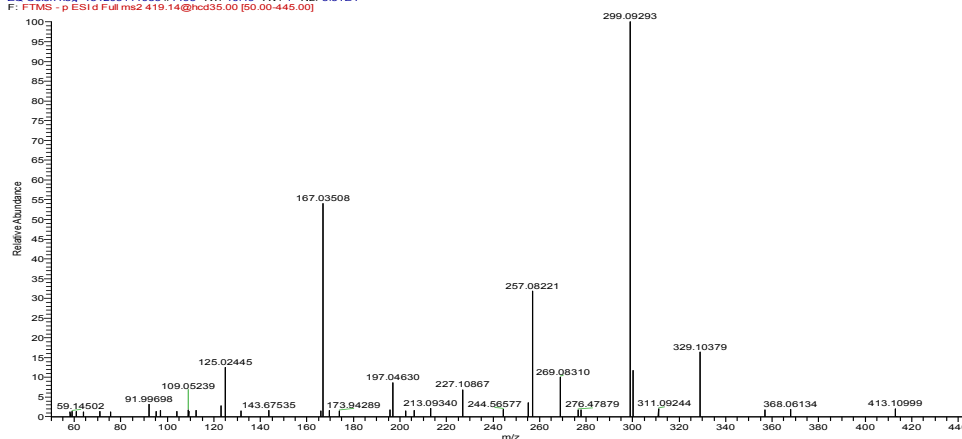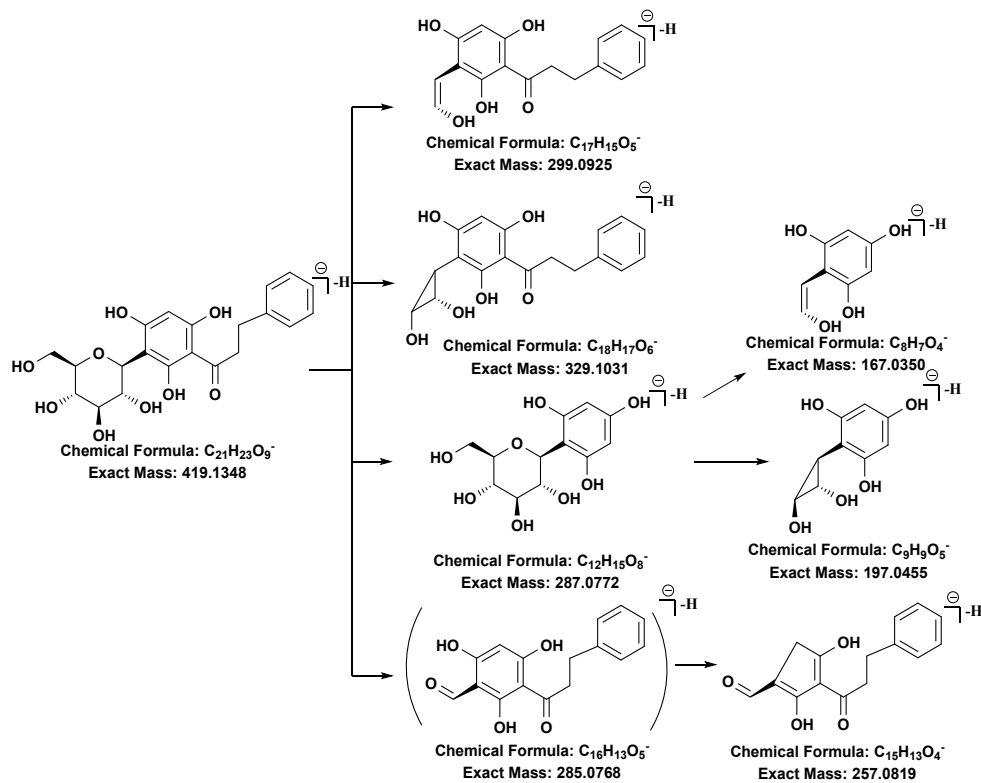

# M15

## Trihydroxyflavone *O*-glucuronide ( $t_R=8.80$ min)

MS<sup>1</sup>(-):

445.07863

MS<sup>2</sup>(-):

269.04626(100), 197.06091(0.6), 171.04570(0.7), 113.02453(2)

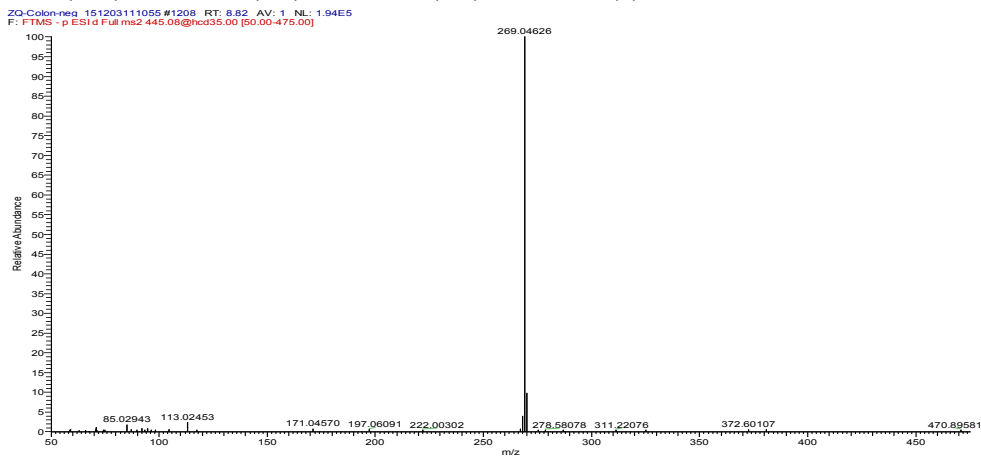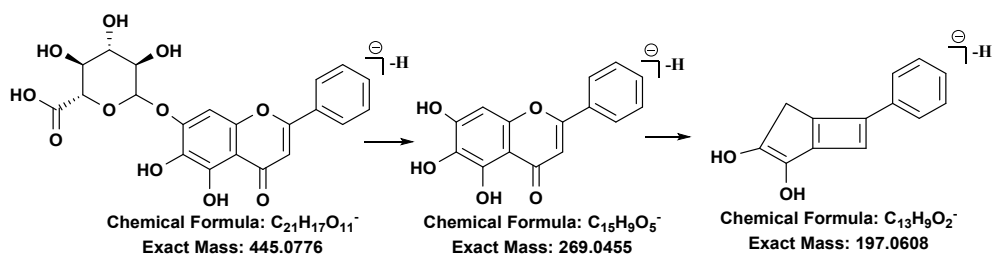

## M16

Trihydroxy-tetramethoxyflavone *O*-sulfate ( $t_R=11.50$  min)

MS<sup>1</sup>(-):

469.04555

MS<sup>2</sup>(-):

389.08881(19),374.06531(100),359.04163(25)

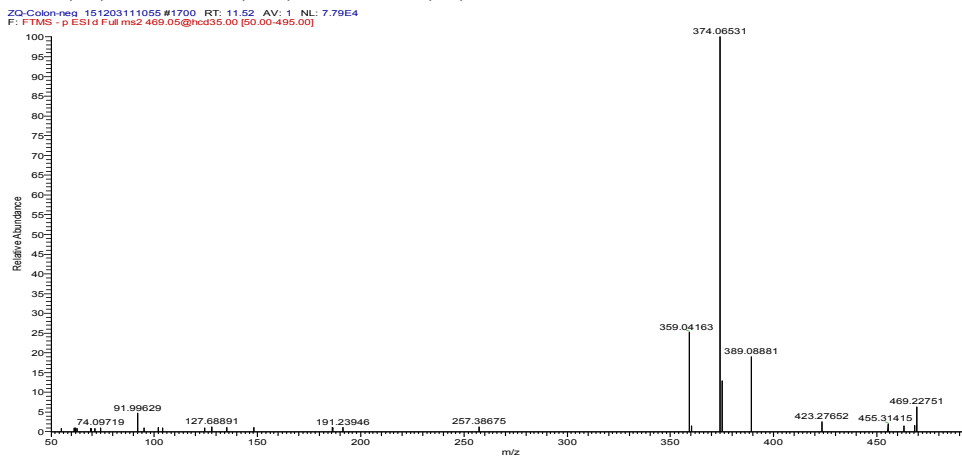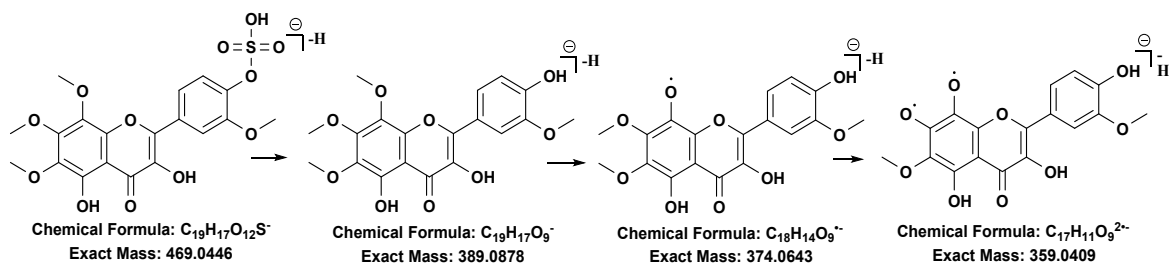

## Reference

1. Wang, Q.-H.; Wu, J.-S.; Wu, R.-J.; Han, N.-R.-C.-K.-T.; Dai, N.-Y.-T., Anti-inflammatory effect and isolation of phenylethanoid and acylated flavone glycosides from *Panzeria alaschanica*. *Z. Naturforsch., B: J. Chem. Sci.* 2015, 70, 379-384.
2. Pendota, S. C.; Ndhlala, A. R.; Aremu, A. O.; Aderogba, M. A.; Van Staden, J., Anti-inflammatory, antioxidant and in silico studies of *Buddleja salviifolia* (L). Lam leaf constituents. *S. Afr. J. Bot.* 2014, 93, 79-85.
3. Jing, W.; Ma, C.; Wang, S., Effects of acteoside on lipopolysaccharide-induced inflammation in acute lung injury via regulation of NF- $\kappa$ B pathway in vivo and in vitro. *Toxicol. Appl. Pharmacol.* 2015, 285, 128-135.
4. Lenoir, L.; Rossary, A.; Joubert-Zakeyh, J.; Vergnaud-Gauduchon, J.; Farges, M.-C.; Fraisse, D.; Texier, O.; Lamaison, J.-L.; Vasson, M.-P.; Felgines, C., Lemon Verbena Infusion Consumption Attenuates Oxidative Stress in Dextran Sulfate Sodium-Induced Colitis in the Rat. *Dig. Dis. Sci.* 2011, 56, 3534-3545.
5. Charami, M.-T.; Lazari, D.; Karioti, A.; Skaltsa, H.; Hadjipavlou-Litina, D.; Souleles, C., Antioxidant and antiinflammatory activities of *Sideritis perfoliata* subsp. *perfoliata* (Lamiaceae). *Phytotherapy Research* 2008, 22, 450-454.
6. Kolak, U.; Boga, M.; Akalin Urusak, E.; Ulubelen, A., Constituents of *Plantago major* subsp. *intermedia* with antioxidant and anticholinesterase capacities. *Turk. J. Chem.* 2011, 35, 637-645.
7. Tao, S.; Huang, Y.; Chen, Z.; Chen, Y.; Wang, Y.; Wang, Y., Rapid identification of anti-inflammatory compounds from Tongmai Yangxin Pills by liquid chromatography with high-resolution mass spectrometry and chemometric analysis. *Journal of Separation Science* 2015, 38, 1881-1893.
8. Sun, Y.; Qin, Y.; Li, H.; Peng, H.; Chen, H.; Xie, H.-r.; Deng, Z., Rapid characterization of chemical constituents in Radix Tetrastigma, a functional herbal mixture, before and after metabolism and their antioxidant/antiproliferative activities. *J. Funct. Foods* 2015, 18, 300-318.
9. Liu, Q.; Hu, H.-J.; Li, P.-F.; Yang, Y.-B.; Wu, L.-H.; Chou, G.-X.; Wang, Z.-T., Diterpenoids and phenylethanoid glycosides from the roots of *Clerodendrum bungei* and their inhibitory effects against angiotensin converting enzyme and  $\alpha$ -glucosidase. *Phytochemistry* 2014, 103, 196-202.
10. Yoshikawa, K.; Harada, A.; Iseki, K.; Hashimoto, T., Constituents of *Caryopteris incana* and their

- antibacterial activity. *Journal of Natural Medicines* 2014, 68, 231-235.
11. Zhou, X.-L.; Wen, Q.-W.; Lin, X.; Zhang, S.-J.; Li, Y.-X.; Guo, Y.-J.; Huang, R.-B., A new phenylethanoid glycoside with antioxidant and anti-HBV activity from *Tarphochlamys affinis*. *Archives of Pharmacal Research* 2014, 37, 600-605.
12. Li, D. P.; Wang, T.; Guo, Y. J.; Hu, Y. J.; Yu, B. Y.; Qi, J., Online screening of nitric oxide scavengers in natural products using high performance liquid chromatography coupled with tandem diode array and fluorescence detection. *Journal Of Chromatography A* 2015, 1425, 106-115.
13. Mamadalieva, N. Z.; Herrmann, F.; El-Readi, M. Z.; Tahrani, A.; Hamoud, R.; Egamberdieva, D. R.; Azimova, S. S.; Wink, M., Flavonoids in *Scutellaria immaculata* and *S. ramosissima* (Lamiaceae) and their biological activity. *The Journal of pharmacy and pharmacology* 2011, 63, 1346-57.
14. Chen, Y. C.; Yang, L. L.; Lee, T. J. F., Oroxylin A inhibition of lipopolysaccharide-induced iNOS and COX 2 gene expression via suppression of nuclear factor-kappa B activation. *Biochemical Pharmacology* 2000, 59, 1445-1457.
15. Ma, S. C.; Du, J.; But, P. P. H.; Deng, X. L.; Zhang, Y. W.; Ooi, V. E. C.; Xu, H. X.; Lee, S. H. S.; Lee, S. F., Antiviral Chinese medicinal herbs against respiratory syncytial virus. *Journal of Ethnopharmacology* 2002, 79, 205-211.
16. Guo, L. L.; Guan, Z. Z.; Huang, Y.; Wang, Y. L.; Shi, J. S., The neurotoxicity of beta-amyloid peptide toward rat brain is associated with enhanced oxidative stress, inflammation and apoptosis, all of which can be attenuated by scutellarin. *Experimental And Toxicologic Pathology* 2013, 65, 579-584.
17. Tan, Z. H.; Yu, L. H.; Wei, H. L.; Liu, G. T., Scutellarin protects against lipopolysaccharide-induced acute lung injury via inhibition of NF-B activation in mice. *Journal Of Asian Natural Products Research* 2010, 12, 175-184.
18. Lee, S.-J.; Jang, H.-J.; Kim, Y.; Oh, H.-M.; Lee, S.; Jung, K.; Kim, Y.-H.; Lee, W.-S.; Lee, S.-W.; Rho, M.-C., Inhibitory effects of IL-6-induced STAT3 activation of bio-active compounds derived from *Salvia plebeia* R.Br. *Process Biochem. (Oxford, U. K.)* 2016, 51, 2222-2229.
19. Yang, X.-X.; Xu, F.; Wang, D.; Yang, Z.-W.; Tan, H.-R.; Shang, M.-Y.; Wang, X.; Cai, S.-Q., Development of a mitochondria-based centrifugal ultrafiltration/liquid chromatography/mass spectrometry method for screening mitochondria-targeted bioactive constituents from complex matrixes: Herbal medicines as a case study. *Journal of Chromatography A* 2015, 1413, 33-46.
20. Cuong, T. D.; Hung, T. M.; Lee, J. S.; Weon, K. Y.; Woo, M. H.; Min, B. S., Anti-inflammatory

activity of phenolic compounds from the whole plant of *Scutellaria indica*. *Bioorganic & Medicinal Chemistry Letters* 2015, 25, 1129-1134.

21. Yang, Y.-Z.; Tang, Y.-Z.; Liu, Y.-H., Wogonoside displays anti-inflammatory effects through modulating inflammatory mediator expression using RAW264.7 cells. *J Ethnopharmacol* 2013, 148, 271-6.

22. Chen, Y.; Lu, N.; Ling, Y.; Gao, Y.; Wang, L.; Sun, Y.; Qi, Q.; Feng, F.; Liu, W.; Liu, W.; You, Q.; Guo, Q., Wogonoside inhibits lipopolysaccharide-induced angiogenesis in vitro and in vivo via toll-like receptor 4 signal transduction. *Toxicology* 2009, 259, 10-17.

23. Zhang, L.; Ren, Y.; Yang, C. L.; Guo, Y.; Zhang, X. J.; Hou, G.; Guo, X. J.; Sun, N.; Liu, Y. Y., Wogonoside Ameliorates Lipopolysaccharide-Induced Acute Lung Injury in Mice. *Inflammation* 2014, 37, 2006-2012.

24. Sun, Y.; Zhao, Y.; Yao, J.; Zhao, L.; Wu, Z. Q.; Wang, Y.; Pan, D.; Miao, H. C.; Guo, Q. L.; Lu, N., Wogonoside protects against dextran sulfate sodium-induced experimental colitis in mice by inhibiting NF-kappa B and NLRP3 inflammasome activation. *Biochemical Pharmacology* 2015, 94, 142-154.

25. Wang, H. F.; Zhang, Y. L.; Bai, R. X.; Wang, M.; Du, S. Y., Baicalin Attenuates Alcoholic Liver Injury through Modulation of Hepatic Oxidative Stress, Inflammation and Sonic Hedgehog Pathway in Rats. *Cell Physiol Biochem* 2016, 39, 1129-1140.

26. Yang, W.; Li, H.; Cong, X.; Wang, X.; Jiang, Z.; Zhang, Q.; Qi, X.; Gao, S.; Cao, R.; Tian, W., Baicalin attenuates lipopolysaccharide induced inflammation and apoptosis of cow mammary epithelial cells by regulating NF- $\kappa$ B and HSP72. *International Immunopharmacology* 2016, 40, 139-145.

27. Gong, W. Y.; Wu, J. F.; Liu, B. J.; Zhang, H. Y.; Cao, Y. X.; Sun, J.; Lv, Y. B.; Wu, X.; Dong, J. C., Flavonoid components in *Scutellaria baicalensis* inhibit nicotine-induced proliferation, metastasis and lung cancer-associated inflammation in vitro. *Int J Oncol* 2014, 44, 1561-70.

28. Hu, C. F.; Wang, Y. Q.; Fan, Y. S.; Li, H. C.; Wang, C. Y.; Zhang, J. D.; Zhang, S. J.; Han, X. L.; Wen, C. P., Lipidomics Revealed Idiopathic Pulmonary Fibrosis-Induced Hepatic Lipid Disorders Corrected with Treatment of Baicalin in a Murine Model. *Aaps Journal* 2015, 17, 711-722.

29. Du, G.; Han, G.; Zhang, S.; Lin, H.; Wu, X.; Wang, M.; Ji, L.; Lu, L.; Yu, L.; Liang, W., Baicalin suppresses lung carcinoma and lung metastasis by SOD mimic and HIF-1 $\alpha$  inhibition. *European Journal of Pharmacology* 2010, 630, 121-130.



30. Fukutake, M.; Yokota, S.; Kamamura, H.; Iizuka, A.; Amagaya, S.; Fukuda, K.; Komatsu, Y., Inhibitory effect of Coptidis Rhizoma and Scutellariae Radix on azoxymethane-induced aberrant crypt foci formation in rat colon. *Biological & Pharmaceutical Bulletin* 1998, 21, 814-817.
31. Lee, J.; Kim, S.; Namgung, H.; Jo, Y. H.; Bao, C.; Choi, H. K.; Auh, J. H.; Lee, H. J., Ellagic Acid Identified through Metabolomic Analysis Is an Active Metabolite in Strawberry ('Seolhyang') Regulating Lipopolysaccharide-Induced Inflammation. *Journal Of Agricultural And Food Chemistry* 2014, 62, 3954-3962.
32. Ge, D.; Shi, Q.-H.; Fu, J.-F.; Liu, Z.-X.; Zheng, J., The Effect of 2',5,6',7-tetrahydroxyflavanonol Pretreatment on the Activation of LPS-induced Macrophages. *Pham J Chin PLA* 2011, 27, 427-430 (in Chinese).
33. Kimura, Y.; Sumiyoshi, M., Effects of various flavonoids isolated from Scutellaria baicalensis roots on skin damage in acute UVB-irradiated hairless mice. *J. Pharm. Pharmacol.* 2011, 63, 1613-1623.
34. Sung, N. Y.; Kim, M.-Y.; Cho, J. Y., Scutellarein reduces inflammatory responses by inhibiting Src kinase activity. *Korean J. Physiol. Pharmacol.* 2015, 19, 441-449.
35. Cheng, C.-Y.; Hu, C.-C.; Yang, H.-J.; Lee, M.-C.; Kao, E.-S., Inhibitory effects of scutellarein on proliferation of human lung cancer A549 cells through ERK and NF $\kappa$ B mediated by EGFR pathway. *Chin. J. Physiol. (Taipei, Taiwan)* 2014, 57, 182-187.
36. Kumar, M.; Kasala, E. R.; Bodduluru, L. N.; Dahiya, V.; Lahkar, M., Baicalein protects isoproterenol induced myocardial ischemic injury in male Wistar rats by mitigating oxidative stress and inflammation. *Inflammation Research* 2016, 65, 613-622.
37. Patwardhan, R. S.; Sharma, D.; Thoh, M.; Checker, R.; Sandur, S. K., Baicalein exhibits anti-inflammatory effects via inhibition of NF- $\kappa$ B transactivation. *Biochem. Pharmacol. (Amsterdam, Neth.)* 2016, 108, 75-89.
38. Kim, S. D.; Lee, Y. J.; Baik, J. S.; Han, J. Y.; Lee, C. G.; Hoe, K.; Park, Y. S.; Kim, J. S.; Ji, H. D.; Park, S. I.; Rhee, M. H.; Yang, K., Baicalein inhibits agonist- and tumor cell-induced platelet aggregation while suppressing pulmonary tumor metastasis via cAMP-mediated VASP phosphorylation along with impaired MAPKs and PI3K-Akt activation. *Biochem. Pharmacol. (Amsterdam, Neth.)* 2014, 92, 251-265.
39. Gao, J. Y.; Zhao, H. Y.; Hylands, P. J.; Corcoran, O., Secondary metabolite mapping identifies

Scutellaria inhibitors of human lung cancer cells. *Journal of Pharmaceutical and Biomedical Analysis* 2010, 53, 723-728.

40. Chandrashekar, N.; Selvamani, A.; Subramanian, R.; Pandi, A.; Thiruvengadam, D., Baicalein inhibits pulmonary carcinogenesis-associated inflammation and interferes with COX-2, MMP-2 and MMP-9 expressions in-vivo. *Toxicology and Applied Pharmacology* 2012, 261, 10-21.

41. Havermann, S.; Chovolou, Y.; Humpf, H.-U.; Waetjen, W., Modulation of the Nrf2 signalling pathway in Hct116 colon carcinoma cells by baicalein and its methylated derivative negletein. *Pharm. Biol. (Abingdon, U. K.)* 2016, 54, 1491-1502.

42. Kim, D. H.; Hossain, M. A.; Kang, Y. J.; Jang, J. Y.; Lee, Y. J.; Im, E.; Yoon, J. H.; Kim, H. S.; Chung, H. Y.; Kim, N. D., Baicalein, an active component of *Scutellaria baicalensis* Georgi, induces apoptosis in human colon cancer cells and prevents AOM/DSS-induced colon cancer in mice. *International Journal of Oncology* 2013, 43, 1652-1658.

43. Khan, S.; Zhang, D.; Zhang, Y.; Li, M.; Wang, C., Wogonin attenuates diabetic cardiomyopathy through its anti-inflammatory and anti-oxidative properties. *Molecular and Cellular Endocrinology* 2016, 428, 101-108.

44. Wang, W. P.; Xia, T. S.; Yu, X. P., Wogonin suppresses inflammatory response and maintains intestinal barrier function via TLR4-MyD88-TAK1-mediated NF-kappa B pathway in vitro. *Inflammation Research* 2015, 64, 423-431.

45. Huang, K.; Huang, Y., Preliminary research on the inducing effects of wogonin on the apoptosis of lung cancer cells and its mechanism. *Med. Plant* 2013, 4, 41-44.

46. Wang, H.; Zhao, L.; Zhu, L.-T.; Wang, Y.; Pan, D.; Yao, J.; You, Q.-D.; Guo, Q.-L., Wogonin reverses hypoxia resistance of human colon cancer HCT116 cells via downregulation of HIF-1 $\alpha$  and glycolysis, by inhibiting PI3K/Akt signaling pathway. *Mol. Carcinog.* 2014, 53, E107-E118.

47. Zhang, Z.-Q.; Liua, W.; Zhang, L.; Wang, J.; Zhang, S., Comparative pharmacokinetics of baicalin, wogonoside, baicalein and wogonin in plasma after oral administration of pure baicalin, *Radix scutellariae* and *Scutellariae-paeoniae* couple extracts in normal and ulcerative colitis rats. *Iran. J. Pharm. Res.* 2013, 12, 399-409.

48. Lee, J. Y.; Park, W., Anti-inflammatory effects of oroxylin A on RAW 264.7 mouse macrophages induced with polyinosinic-polycytidylic acid. *Exp. Ther. Med.* 2016, 12, 151-156.

49. Wang, H.; Guo, Y.; Zhao, X.; Li, H.; Fan, G.; Mao, H.; Miao, L.; Gao, X., An estrogen receptor

dependent mechanism of Oroxylin A in the repression of inflammatory response. *PLoS One* 2013, 8, e69555.

50. Wei, L. B.; Dai, Q. S.; Zhou, Y. X.; Zou, M. J.; Li, Z. Y.; Lu, N.; Guo, Q. L., Oroxylin A sensitizes non-small cell lung cancer cells to anoikis via glucose-deprivation-like mechanisms: c-Src and hexokinase II (vol 1830, pg 2835, 2013). *Biochimica Et Biophysica Acta-General Subjects* 2015, 1850, 857-857.

51. Ha, J.; Zhao, L.; Zhao, Q.; Yao, J.; Zhu, B.-B.; Lu, N.; Ke, X.; Yang, H.-Y.; Li, Z.; You, Q.-D.; Guo, Q.-L., Oroxylin A improves the sensitivity of HT-29 human colon cancer cells to 5-FU through modulation of the COX-2 signaling pathway. *Biochemistry and Cell Biology* 2012, 90, 521-531.

52. Chandrasekaran, C. V.; Thiyagarajan, P.; Deepak, H. B.; Agarwal, A., In vitro modulation of LPS/calcimycin induced inflammatory and allergic mediators by pure compounds of *Andrographis paniculata* (King of bitters) extract. *International Immunopharmacology* 2011, 11, 79-84.

53. Balez, R.; Steiner, N.; Engel, M.; Munoz, S. S.; Lum, J. S.; Wu, Y.; Wang, D.; Vallotton, P.; Sachdev, P.; O'Connor, M.; Sidhu, K.; Munch, G.; Ooi, L., Neuroprotective effects of apigenin against inflammation, neuronal excitability and apoptosis in an induced pluripotent stem cell model of Alzheimer's disease. *Sci. Rep.* 2016, 6, 31450.

54. Asensi, M.; Ortega, A.; Mena, S.; Feddi, F.; Estrela, J. M., Natural polyphenols in cancer therapy. *Crit. Rev. Clin. Lab. Sci.* 2011, 48, 197-216.

55. Armah, F. A.; Annan, K.; Mensah, A. Y.; Amponsah, I. K.; Tocher, D. A.; Habtemariam, S., Erythroivorensin: A novel anti-inflammatory diterpene from the root-bark of *Erythrophleum ivorens* (A Chev.). *Fitoterapia* 2015, 105, 37-42.

56. Akram, M.; Syed, Ahmed S.; Kim, K.-A.; Lee, Jong S.; Chang, S.-Y.; Kim, Chul Y.; Bae, O.-N., Heme oxygenase 1-mediated novel anti-inflammatory activities of *Salvia plebeia* and its active components. *Journal of Ethnopharmacology* 2015, 174, 322-330.

57. Woerdenbag, H. J.; Merfort, I.; Schmidt, T. J.; Passreiter, C. M.; Willuhn, G.; Van Uden, W.; Pras, N.; Konings, A. W. T., Decreased helenalin-induced cytotoxicity by flavonoids from *Arnica* as studied in a human lung carcinoma cell line. *Phytomedicine* 1995, 2, 127-132.

58. Rashid, S.; Nafees, S.; Vafa, A.; Afzal, S. M.; Ali, N.; Rehman, M. U.; Hasan, S. K.; Siddiqi, A.; Barnwal, P.; Majed, F.; Sultana, S., Inhibition of precancerous lesions development in kidneys by chrysin via regulating hyperproliferation, inflammation and apoptosis at pre clinical stage. *Archives of*

*Biochemistry and Biophysics* 2016, 606, 1-9.

59. Bhaskaran, N.; Shukla, S.; Srivastava, J. K.; Gupta, S., Chamomile: an anti-inflammatory agent inhibits inducible nitric oxide synthase expression by blocking RelA/p65 activity. *Int. J. Mol. Med.* 2010, 26, 935-940.
60. Liao, H.-R.; Chang, Y.-S.; Lin, Y.-C.; Yang, L.-L.; Chou, Y.-M.; Wang, B.-C., QSAR analysis of the lipid peroxidation inhibitory activity with structure and energetics of 36 flavonoids derivatives. *J. Chin. Chem. Soc. (Taipei, Taiwan)* 2006, 53, 1251-1261.
61. Qiao, X.; Li, R.; Song, W.; Miao, W.-j.; Liu, J.; Chen, H.-b.; Guo, D.-a.; Ye, M., A targeted strategy to analyze untargeted mass spectral data: Rapid chemical profiling of *Scutellaria baicalensis* using ultra-high performance liquid chromatography coupled with hybrid quadrupole orbitrap mass spectrometry and key ion filtering. *Journal of Chromatography A* 2016, 1441, 83-95.
62. Shang, X.; He, X.; He, X.; Li, M.; Zhang, R.; Fan, P.; Zhang, Q.; Jia, Z., The genus *Scutellaria* an ethnopharmacological and phytochemical review. *Journal of Ethnopharmacology* 2010, 128, 279-313.
63. Jin, M.-R.; Xu, H.; Duan, C.-H.; Chou, G.-X., Two new flavones from *Salvia plebeia*. *Natural product research* 2015, 29, 1315-1322.
64. Shen, G.; Van Kiem, P.; Cai, X.-F.; Li, G.; Dat, N. T.; Choi, Y. A.; Lee, Y. M.; Park, Y. K.; Kim, Y. H., Solanoflavone, a new biflavonol glycoside from *Solanum melongena*: Seeking for anti-inflammatory components. *Archives of pharmacal research* 2005, 28, 657-659.
65. Sabudak, T.; Demirkiran, O.; Ozturk, M.; Topcu, G., Phenolic compounds from *Trifolium echinatum* Bieb. and investigation of their tyrosinase inhibitory and antioxidant activities. *Phytochemistry* 2013, 96, 305-311.
66. Marczak, Ł.; Stobiecki, M.; Jasiński, M.; Oleszek, W.; Kachlicki, P., Fragmentation pathways of acylated flavonoid diglucuronides from leaves of *Medicago truncatula*. *Phytochemical Analysis* 2010, 21, 224-233.
67. Sun, H. Y.; Liu, M. X.; Lin, Z. T.; Jiang, H.; Niu, Y. Y.; Wang, H.; Chen, S. Z., Comprehensive identification of 125 multifarious constituents in Shuang-huang-lian powder injection by HPLC-DAD-ESI-IT-TOF-MS. *J Pharmaceut Biomed* 2015, 115, 86-106.
68. Wang, M. H.; Li, L. Z.; Sun, J. B.; Wu, F. H.; Liang, J. Y., A new antioxidant flavone glycoside from *Scutellaria baicalensis* Georgi. *Nat Prod Res* 2014, 28, 1772-6.
69. Olennikov, D. N.; Chirikova, N. K.; Tankhaeva, L. M., Phenolic compounds of scullcap

- (*Scutellaria baicalensis*. Georgi). *Khim. Rastit. Syr'ya* 2009, 89-98.
70. Wang, H.; Cao, J.; Xu, S.; Gu, D.; Wang, Y.; Xiao, S., Depletion of high-abundance flavonoids by metal complexation and identification of low-abundance flavonoids in *Scutellaria baicalensis* Georgi. *J Chromatogr A* 2013, 1315, 107-17.
71. Han, J.; Ye, M.; Xu, M.; Sun, J. H.; Wang, B. R.; Guo, D., Characterization of flavonoids in the traditional Chinese herbal medicine-Huangqin by liquid chromatography coupled with electrospray ionization mass spectrometry. *J Chromatogr B* 2007, 848, 355-362.
72. Malikov, V.; Yuldashev, M., Phenolic compounds of plants of the *Scutellaria* L. genus. Distribution, structure, and properties. *Chemistry of natural compounds* 2002, 38, 358-406.
73. Zhang, J.; Park, H. S.; Kim, J. A.; Hong, G. E.; Nagappan, A.; Park, K. I.; Kim, G. S., Flavonoids Identified from Korean *Scutellaria baicalensis* Induce Apoptosis by ROS Generation and Caspase Activation on Human Fibrosarcoma Cells. *Am J Chinese Med* 2014, 42, 465-483.
74. Imperato, F., 1-Caffeyllaminaribiose-new hydroxycinnamic acid sugar derivative from *Asplenium-Adiantum-Nigrum* L. *SOC CHEMICAL INDUSTRY 14 BELGRAVE SQUARE, LONDON, ENGLAND SW1X 8PS* 1979, 553-554.
75. Li, Z.-P.; Wei, H.-Q., A Summary on the Study of the Chemical constituents of *Scutellaria*. *World Notes on Plant Medicine* 1994, 09, 147-156(in Chinese).
76. Farag, M. A.; Sakna, S. T.; El-fiky, N. M.; Shabana, M. M.; Wessjohann, L. A., Phytochemical, antioxidant and antidiabetic evaluation of eight *Bauhinia* L. species from Egypt using UHPLC–PDA–qTOF-MS and chemometrics. *Phytochemistry* 2015, 119, 41-50.
77. Chang, M.-S.; Yang, Y.-C.; Kuo, Y.-C.; Kuo, Y.-H.; Chang, C.; Chen, C.-M.; Lee, T.-H., Furocoumarin Glycosides from the Leaves of *Ficus ruficaulis* Merr. var. *antaensis*. *Journal of natural products* 2005, 68, 11-13.
78. Jaiswal, R.; Halabi, E. A.; Karar, M. G. E.; Kuhnert, N., Identification and characterisation of the phenolics of *Ilex glabra* L. Gray (Aquifoliaceae) leaves by liquid chromatography tandem mass spectrometry. *Phytochemistry* 2014, 106, 141-155.
79. Martinez-Vazquez, M.; Estrada-Reyes, R.; Martinez-Laurrabaquio, A.; Lopez-Rubalcava, C.; Heinze, G., Neuropharmacological study of *Dracocephalum moldavica* L. (Lamiaceae) in mice: sedative effect and chemical analysis of an aqueous extract. *J Ethnopharmacol* 2012, 141, 908-17.
80. Yan, R. Y.; Cao, Y. Y.; Chen, C. Y.; Dai, H. Q.; Yu, S. X.; Wei, J. L.; Li, H.; Yang, B.,

Antioxidant flavonoids from the seed of *Oroxylum indicum*. *Fitoterapia* 2011, 82, 841-848.

81. Abd-Alla, H. I.; Albalawy, M. A.; Aly, H. F.; Shalaby, N. M.; Shaker, K. H., Flavone composition and antihypercholesterolemic and antihyperglycemic activities of *Chrysanthemum coronarium* L. *Zeitschrift für Naturforschung C* 2014, 69, 199-208.
